# Supplementary material for: Heterogeneous carbon nitride photocatalyst for C–C bond oxidative cleavage of vicinal diols in aerobic micellar medium
Source: Royal Society of Chemistry journal article supplement (doi:10.1039/d0gc01727b), 2020-01-01

**Heterogeneous Carbon Nitrides Photocatalysis C-C Bond Oxidative Cleavage of Vicinal Diols in Aerobic Micellar Medium**

Tengfei Niu\*, Shengjun Chen, Mei Hong, Tianhao Zhang, Jiayang Chen, Xinyu Dong, Bangqing Ni\*

|                                    |           |
|------------------------------------|-----------|
| <b>General Methods .....</b>       | <b>2</b>  |
| <b>Experimental Section .....</b>  | <b>2</b>  |
| <b>Characterization data .....</b> | <b>9</b>  |
| <b>NMR Spectra .....</b>           | <b>20</b> |

## General Methods

All chemicals were commercially available and used without further purification. Analytical thin-layer chromatography was performed on glass plates precoated with silica gel impregnated with a fluorescent indicator (254 nm). The plates were visualized by exposure to ultraviolet light.  $^1\text{H}$  NMR spectra were recorded on Bruker DRX (400 MHz) and  $^{13}\text{C}$  NMR spectra on Bruker DRX (100 MHz) spectrometer. Mass spectra were taken on a Finnigan TSQ Quantum-MS instrument in the electrospray ionization (ESI) mode. X-ray diffraction (XRD) pattern was recorded with a diffractometer (Bruker D8 Advance) using Cu K $\alpha$  radiation. The catalysts were examined at room temperature at a range of 10–80° on 2 $\theta$ . The N $_2$  adsorption–desorption isotherms were measured using a Quantachrome Autosorb iQ instrument. UV–vis diffuse reflectance spectroscopy (UV–vis DRS) of the samples were measured using a UV-3600 plus spectrometer (Shimadzu, Japan) and the spectra were collected at 300–800nm using BaSO $_4$  as a reference.

## Experimental Section

**Table S1 Optimization of reaction conditions for internal 1,2-diols**

| Entry | Catalyst                                | solvent                | Conv./% | Sel./% <sup>b</sup> |
|-------|-----------------------------------------|------------------------|---------|---------------------|
| 1     | CN620 (20 mg)                           | CH $_3$ OH             | 87      | 70                  |
| 2     | CN620 (20 mg)                           | MeCN                   | 82      | 73                  |
| 3     | CN620 (20 mg)                           | CH $_2$ Cl $_2$        | 32      | 57                  |
| 4     | CN620 (20 mg)                           | DMF                    | 76      | 43                  |
| 5     | p-g-C $_3$ N $_4$ (20 mg)               | CH $_3$ OH             | 88      | 55                  |
| 6     | Fe $_2$ O $_3$ @g-C $_3$ N $_4$ (20 mg) | CH $_3$ OH             | 78      | 50                  |
| 7     | CuO@g-C $_3$ N $_4$ (20 mg)             | CH $_3$ OH             | 82      | 52                  |
| 8     | Acr $^+$ –Mes (2 mol%)                  | CH $_3$ OH             | 100     | 37                  |
| 9     | Eosin Y (2 mol%)                        | CH $_3$ OH             | 74      | 68                  |
| 10    | Ru(bpy) $_3$ Cl $_2$ (2 mol%)           | CH $_3$ OH             | 40      | 100                 |
| 11    | Rhodamine B (2 mol%)                    | CH $_3$ OH             | 51      | 53                  |
| 12    | CN620 (20 mg)                           | H $_2$ O               | 8       | 75                  |
| 13    | CN620 (20 mg)                           | 2wt% Brij L4/H $_2$ O  | 84      | 90                  |
| 14    | CN620 (20mg)                            | 2wt% Brij O20/H $_2$ O | 62      | 13                  |
| 15    | CN620 (20mg)                            | 2wt% Brij C20/H $_2$ O | 74      | 66                  |
| 16    | CN620 (20mg)                            | 2wt% Brij SDS/H $_2$ O | 66      | 47                  |
| 17    | CN620 (20mg)                            | 2wt% CTAB/H $_2$ O     | 94      | 90                  |
| 18    | CN620 (20mg)                            | 1wt% CTAB/H $_2$ O     | 92      | 77                  |
| 19    | CN620 (20mg)                            | 4wt% CTAB/H $_2$ O     | 86      | 90                  |
| 20    | CN620 (30mg)                            | 2wt% CTAB/H $_2$ O     | 95      | 79                  |

|                 |                                                                         |                            |       |    |
|-----------------|-------------------------------------------------------------------------|----------------------------|-------|----|
| 21 <sup>c</sup> | CN620 (20mg)                                                            | 2wt% CTAB/H <sub>2</sub> O | 84    | 85 |
| 22              | p-g-C <sub>3</sub> N <sub>4</sub> (20 mg)                               | 2wt% CTAB/H <sub>2</sub> O | 84    | 61 |
| 23              | Fe <sub>2</sub> O <sub>3</sub> @g-C <sub>3</sub> N <sub>4</sub> (20 mg) | 2wt% CTAB/H <sub>2</sub> O | 73    | 54 |
| 24              | CuO@g-C <sub>3</sub> N <sub>4</sub> (20 mg)                             | 2wt% CTAB/H <sub>2</sub> O | 80    | 63 |
| 25              | Acr+-Mes (2 mol%)                                                       | 2wt% CTAB/H <sub>2</sub> O | Trace | -  |
| 26              | Eosin Y (2 mol%)                                                        | 2wt% CTAB/H <sub>2</sub> O | Trace | -  |
| 27              | Ru(bpy) <sub>3</sub> Cl <sub>2</sub> (2 mol%)                           | 2wt% CTAB/H <sub>2</sub> O | Trace | -  |
| 28              | Rhodamine B (2 mol%)                                                    | 2wt% CTAB/H <sub>2</sub> O | Trace | -  |
| 29              | NO                                                                      | 2wt% CTAB/H <sub>2</sub> O | NR    | NR |
| 30 <sup>d</sup> | CN620 (20mg)                                                            | 2wt% CTAB/H <sub>2</sub> O | NR    | NR |

<sup>a</sup> Reaction conditions: substrate **1a** (1 mmol), CN620 under Xe lamp (250 W) irradiation or homogeneous PC under blue LED (5W), at room temperature, solvent (3 mL), O<sub>2</sub> atmosphere, reaction for 5 hours. <sup>b</sup> Conversion and selectivity determined by HPLC. <sup>c</sup> reaction carried out at open air. <sup>d</sup> reaction without light.

**Table S2 Optimization of reaction conditions for monosubstituted 1,2-diols**

c1ccccc1C(O)CO (3a)  $\xrightarrow[\text{Surfactant/solvent, O}_2(1\text{atm})]{\text{CN620, Xe lamp}}$  c1ccccc1C(=O)O (2a)

| Entry | Base (eq)                           | Surfactant/solvent                        | Conversion/% | Yield(%) <sup>b</sup> |
|-------|-------------------------------------|-------------------------------------------|--------------|-----------------------|
| 1     | —                                   | CH <sub>3</sub> CN: H <sub>2</sub> O(1:1) | 83           | 37                    |
| 2     | Na <sub>2</sub> CO <sub>3</sub> (2) | CH <sub>3</sub> CN: H <sub>2</sub> O(1:1) | 71           | 68                    |
| 3     | NaHCO <sub>3</sub> (2)              | CH <sub>3</sub> CN: H <sub>2</sub> O(1:1) | 37           | 37                    |
| 4     | CaCO <sub>3</sub> (2)               | CH <sub>3</sub> CN: H <sub>2</sub> O(1:1) | 58           | 21                    |
| 5     | Cs <sub>2</sub> CO <sub>3</sub> (2) | CH <sub>3</sub> CN: H <sub>2</sub> O(1:1) | 46           | 43                    |
| 6     | Na <sub>2</sub> CO <sub>3</sub> (1) | CH <sub>3</sub> CN: H <sub>2</sub> O(1:1) | 53           | 42                    |
| 7     | Na <sub>2</sub> CO <sub>3</sub> (4) | CH <sub>3</sub> CN: H <sub>2</sub> O(1:1) | 36           | 12                    |
| 8     | Na <sub>2</sub> CO <sub>3</sub> (4) | H <sub>2</sub> O                          | Trace        | Trace                 |
| 9     | Na <sub>2</sub> CO <sub>3</sub> (2) | 2wt%CTAB/H <sub>2</sub> O                 | 78           | 78                    |
| 10    | Na <sub>2</sub> CO <sub>3</sub> (2) | 2wt%Brij L4/H <sub>2</sub> O              | 88           | 88                    |
| 11    | Na <sub>2</sub> CO <sub>3</sub> (2) | 2WT% Brij C20/H <sub>2</sub> O            | 68           | 72                    |
| 12    | Na <sub>2</sub> CO <sub>3</sub> (2) | 2WT% Brij SDS/H <sub>2</sub> O            | 65           | 63                    |

<sup>a</sup> Reaction conditions: 1-Phenyl-1,2-ethanediol (1mmol), CN620 (20 mg), solvent (3 mL), the reaction filled with oxygen (1 atm), at room temperature, Xe lamp (250 W), 5 h irradiation. <sup>b</sup> Conversion and yield determined by HPLC. <sup>c</sup> reaction carried out at open air. <sup>d</sup> reaction without light.

## The D<sub>2</sub>O isotope experiment.

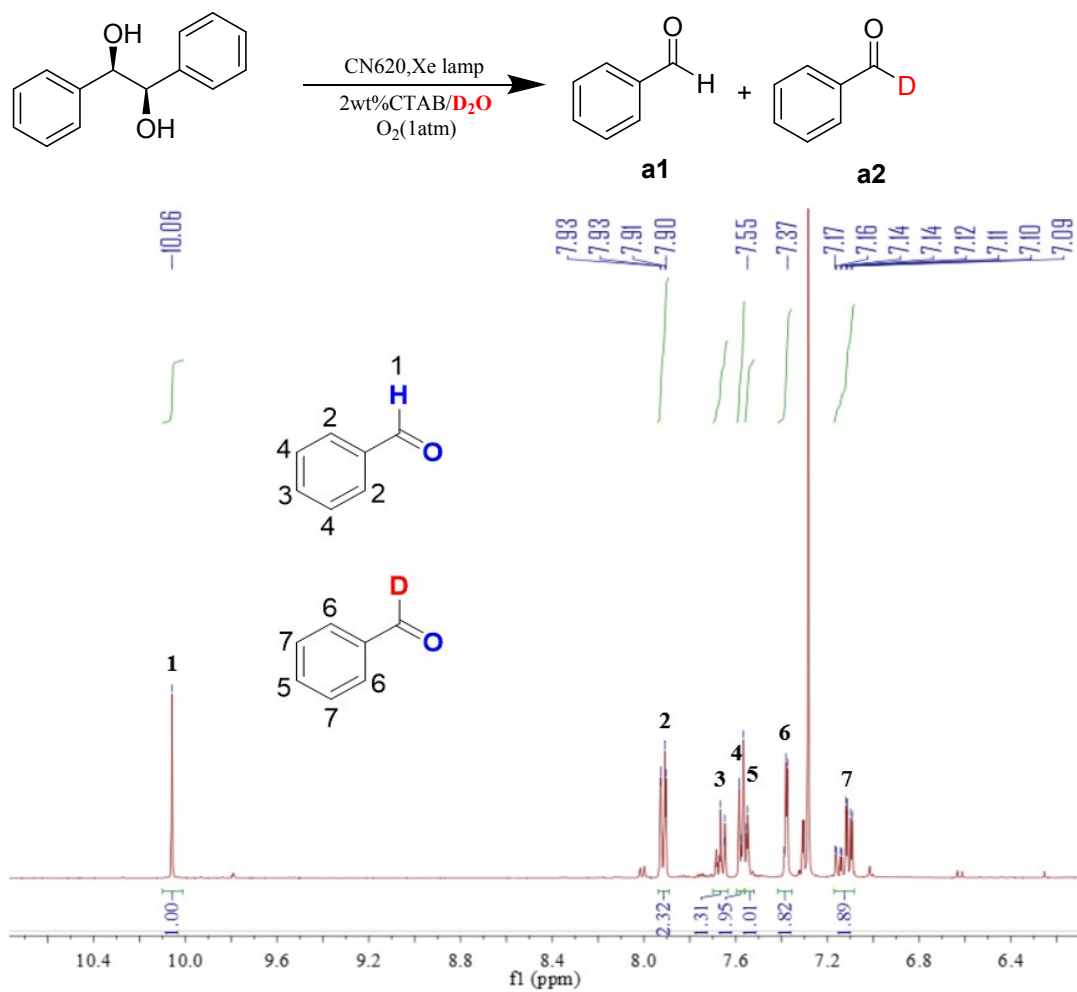

Sa1:Sa2≈1:1.1

## The H<sub>2</sub>O<sup>18</sup> isotope experiment.

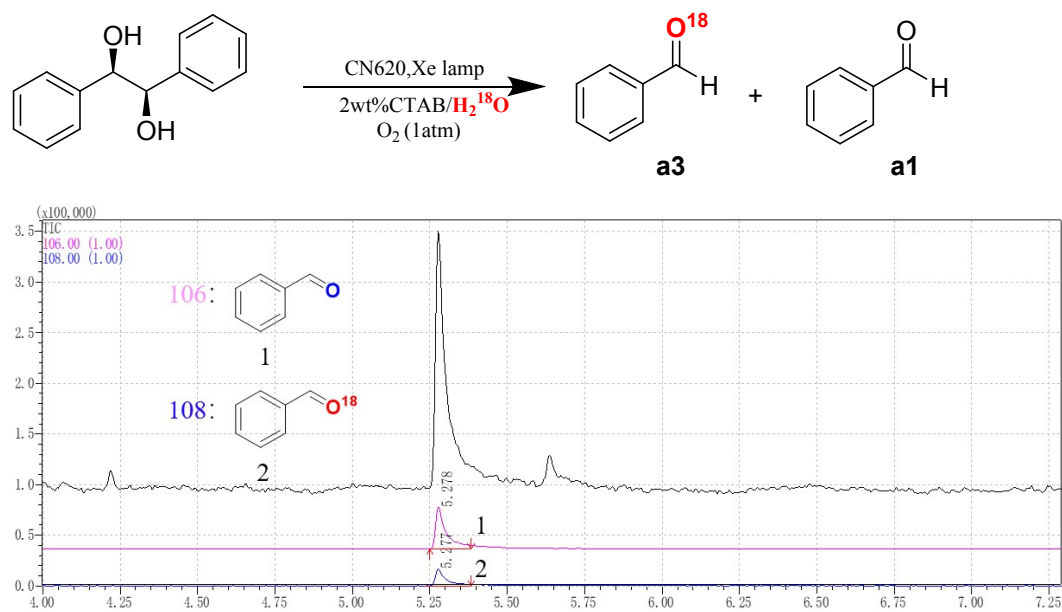

Sa3:Sa1=40282:103381≈1:2.57

### The O<sub>2</sub><sup>18</sup> isotope experiment.

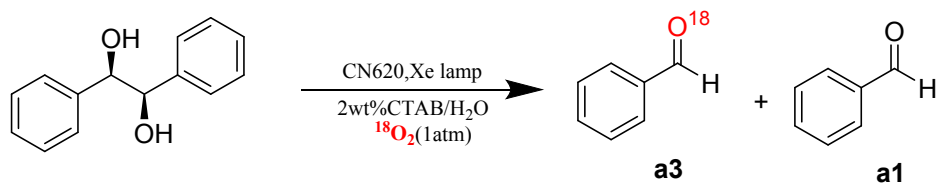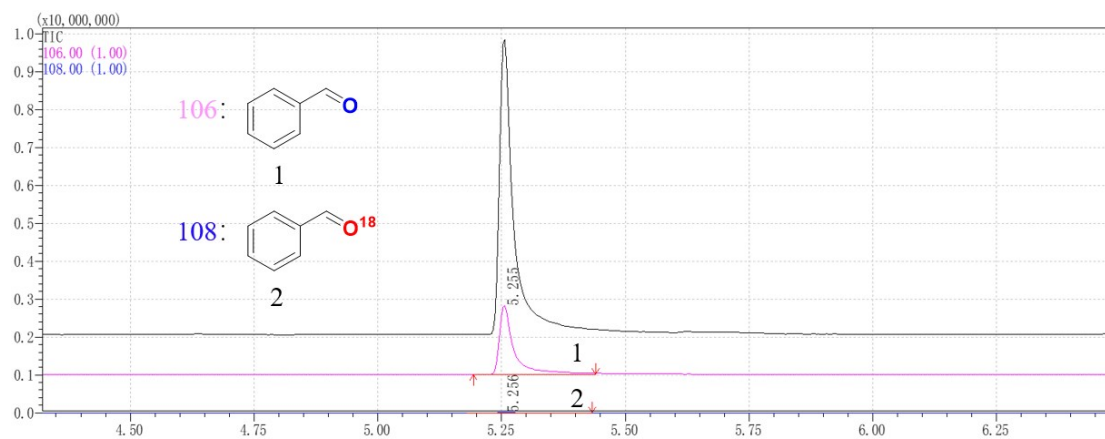

Sa3:Sa1=23496:3752891≈1:159.72

### The O<sub>2</sub><sup>18</sup> isotope experiment in dry CH<sub>3</sub>CN.

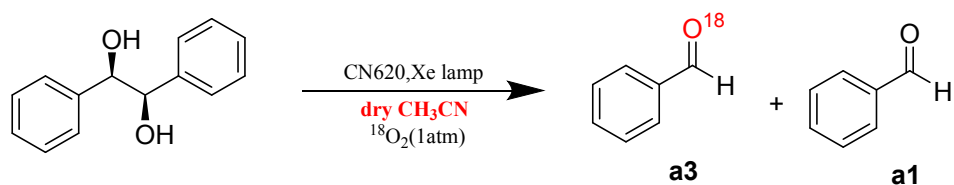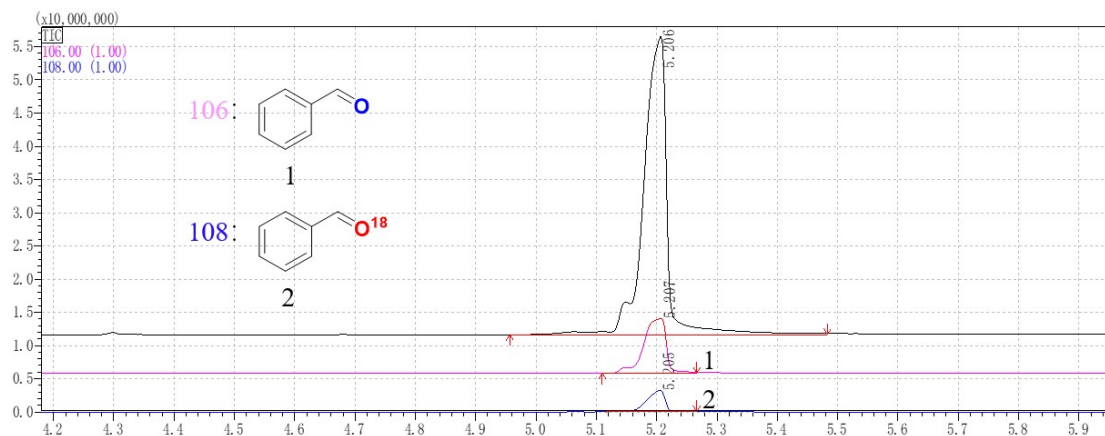

Sa3:Sa1=6925663:21078363≈1:3.04

### The H<sub>2</sub>O<sup>18</sup> isotope experiment.

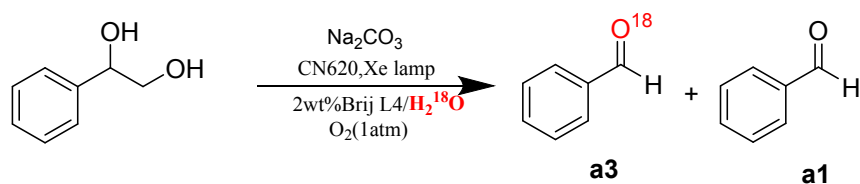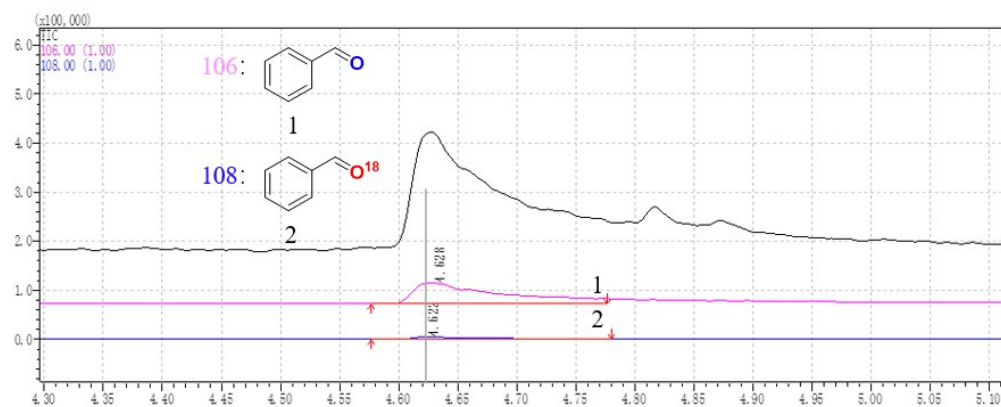

Sa3:Sa1=24237:228890≈1:9.44

### The O<sub>2</sub><sup>18</sup> isotope experiment.

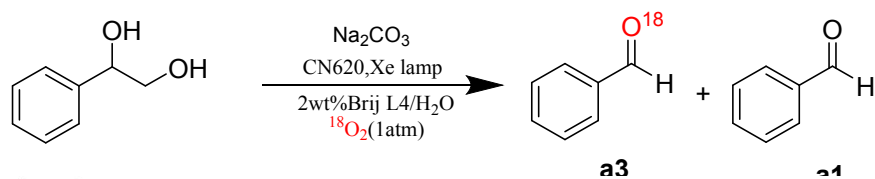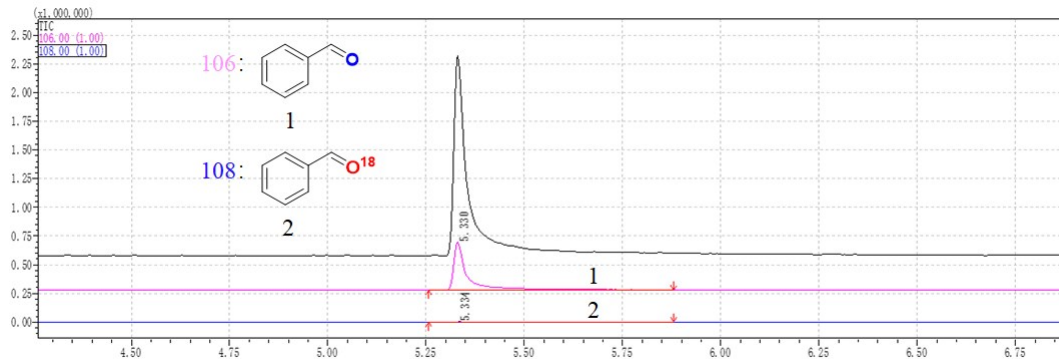

Sa3:Sa1=11144:2108853≈1:189.2

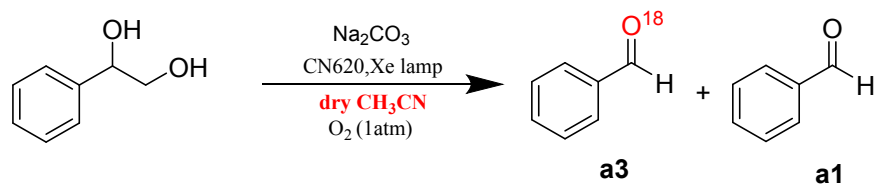

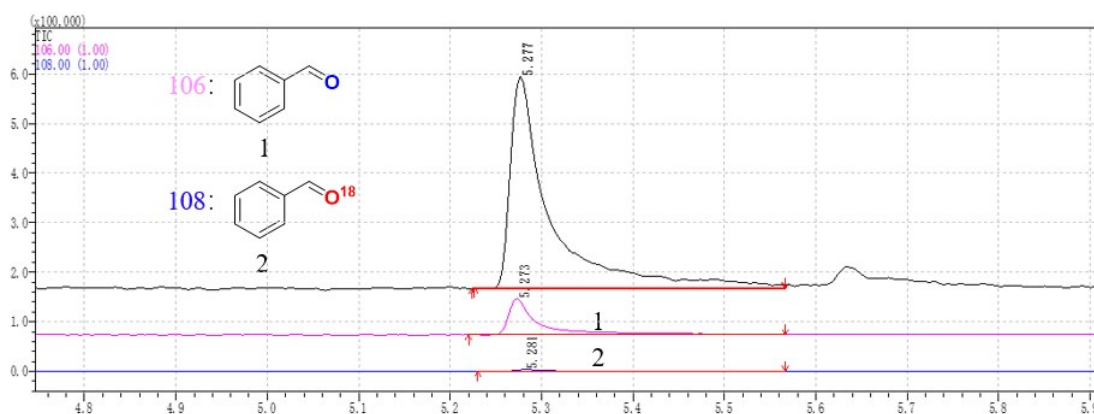

Sa3:Sa1=11982:177455≈1:14.81

### Synthesis of CN620<sup>1</sup>:

5g of dicyandiamide was put into a covered crucible, heated to 500°C at a ramp rate of 5°C min<sup>-1</sup> in a tube furnace under air condition and then maintained at this temperature for additional 4h, noted as CN. 1g of CN was put into a crucible, heated to 620°C at a ramp rate of 5°C min<sup>-1</sup> in a tube furnace under N<sub>2</sub> condition, respectively, and maintained at the corresponding temperature for 2h.

### Representative procedure for oxidative cleavage of (R, R)-hydrobenzoin to Benzaldehyde:

A 25 mL reaction vessel with a magnetic stirring bar was equipped with (R, R)-hydrobenzoin (1 mmol), CN620 (20 mg), CTAB (60mg) and distilled water (3 mL). The mixture was irradiated with a Xe lamp (250 W) and stirred at r.t. in an oxygen atmosphere for 5 h. The distance of the reaction vial from the light is about 10 centimeters. After the reaction, the solvent was extracted with EtOAc (3×10mL). The extracted solution was dried with anhydrous Na<sub>2</sub>SO<sub>4</sub> and concentrated under reduced pressure. Purification of the crude product was achieved by flash column chromatography using petrol ether/ethyl acetate (5:1~10:1) as eluent.

### Representative procedure for oxidative cleavage of 1-phenyl-1,2-ethanediol to benzaldehyde:

A 25 mL reaction vessel with a magnetic stirring bar was equipped with benzaldehyde (1 mmol), CN620 (20 mg), Na<sub>2</sub>CO<sub>3</sub> (2 mmol), Brij L4 (60mg) and distilled water (3 mL). The mixture was irradiated with a Xe lamp (250 W) and stirred at r.t. in an oxygen atmosphere for 5 h. The distance of the reaction vial from the light is about 10 centimeters. After the reaction, the solvent was extracted with EtOAc (3×10mL). The extracted solution was dried with anhydrous Na<sub>2</sub>SO<sub>4</sub> and concentrated under reduced pressure. Purification of the crude product was achieved by flash column chromatography using petrol ether/ethyl acetate (5:1~10:1) as eluent.

### Representative procedure for photocatalyst recycling

A 25 mL reaction vessel with a magnetic stirring bar was equipped with (R, R)-hydrobenzoin (1 mmol), CN620 (20 mg), CTAB (60mg) and distilled water (3 mL). The mixture was irradiated with a Xe lamp (250 W) and stirred at r.t. in an oxygen atmosphere for 5 h. The distance of the reaction vial from the light is about 10 centimeters. Once the reaction was finished, the solvent was extracted with EtOAc (3×6mL). The extracted solution was tested by HPLC. Then another (R, R)-

hydrobenzoin (1 mmol) was added in the separated aqueous medium without fresh portion of surfactant or catalyst for recycle reaction.

## Characterization data

### Characterization of the catalyst

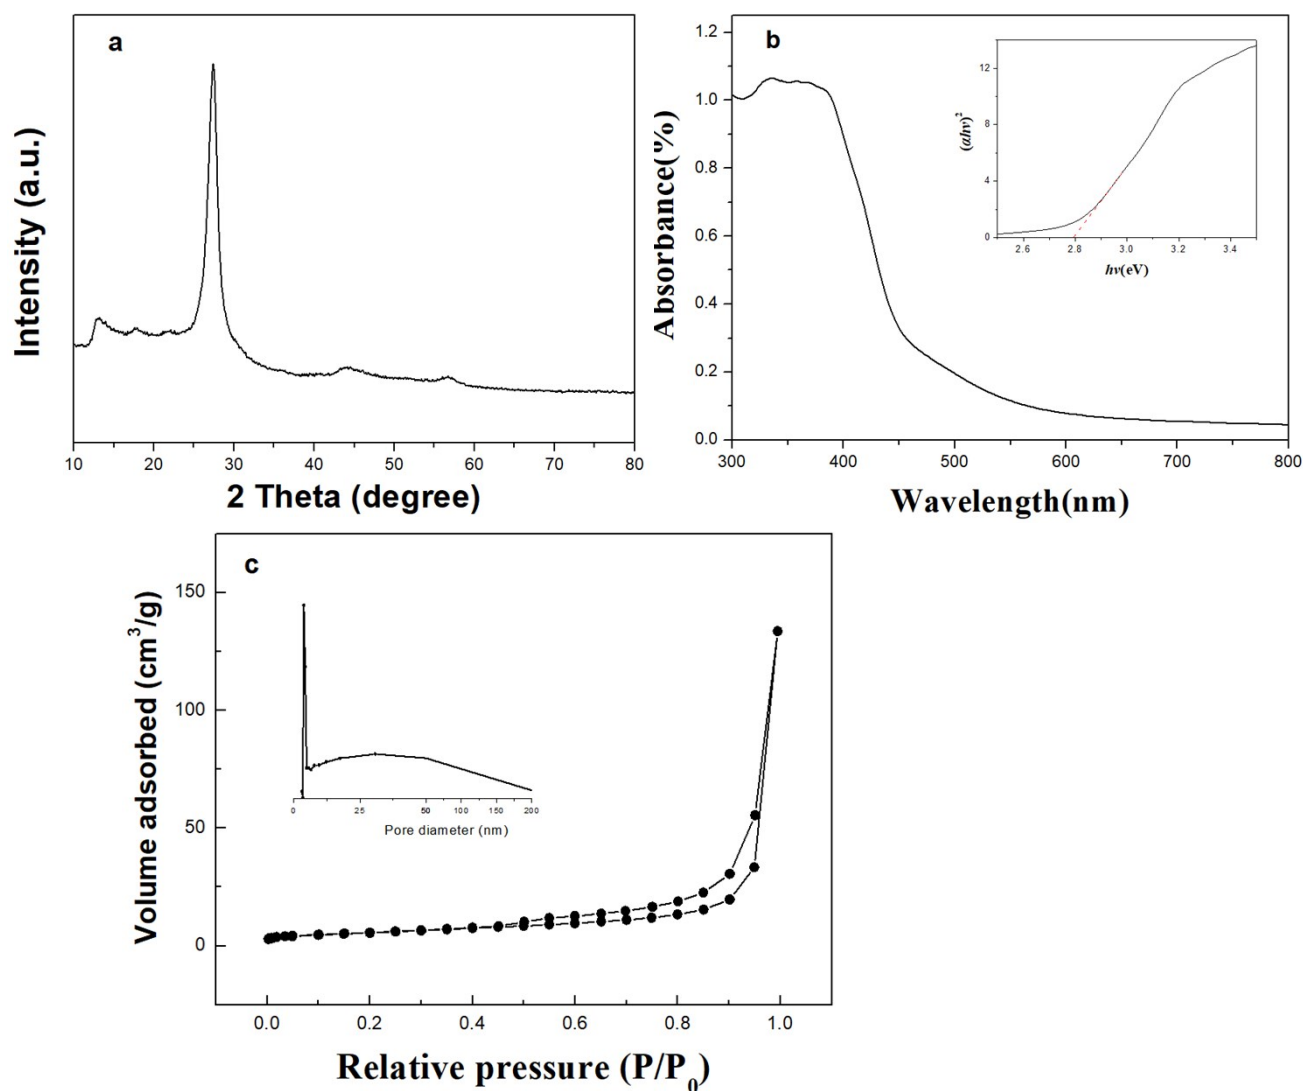

**Figure S1.** (a) XRD patterns and (b) diffuse reflectance UV-vis spectra (c) Nitrogen adsorption–desorption isotherms and Barret-Joyner-Halenda (BJH) pore size distribution plots (inset) of CN620.

The XRD patterns of CN620 show two diffraction peaks at 13.2° and 27.4°, which correspond to the (100) and (002) crystal planes of the graphitic carbon nitride, respectively. Figure S1 (b) shows UV–vis diffuse reflectance spectra (DRS) and calculated bandgaps for CN620 samples. The calculated band gaps were approximately 2.79 eV for CN620. The Brunauer-Emmett-Teller (BET) specific surface areas of CN620 were calculated to be 19.961 m<sup>2</sup>g<sup>-1</sup>.



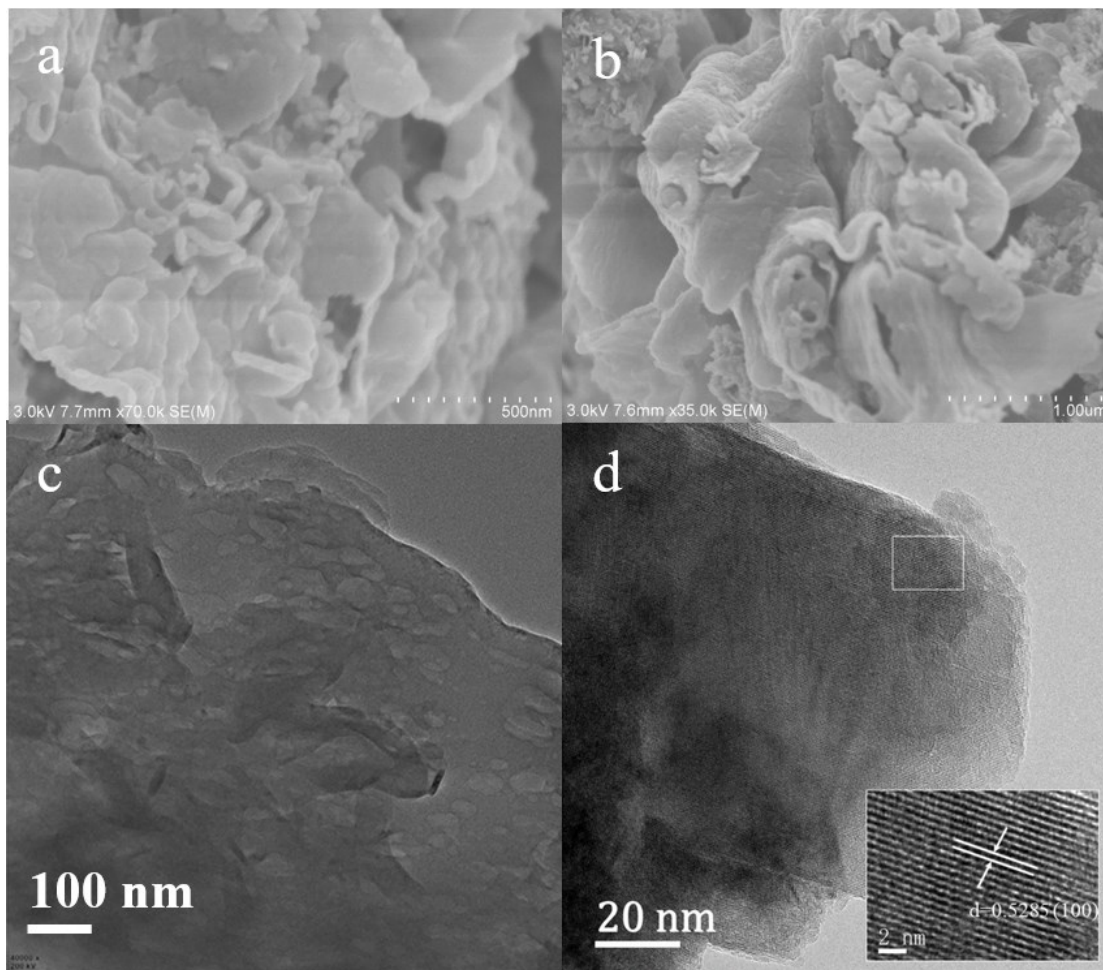

**Figure S2.** (a,b) SEM, (c) TEM and (d) HRTEM image of CN620.

The morphology of the sample was observed by scanning electron microscope (SEM) and transmission electron microscope (TEM). SEM and TEM spectra show that CN620 has a lamellar stacking structure, and some crack holes are generated while stacking. The high-resolution TEM image reveals well-defined lattice fringes with an interplanar spacing of 0.5285 nm, corresponding to the (100) plane of CN620.

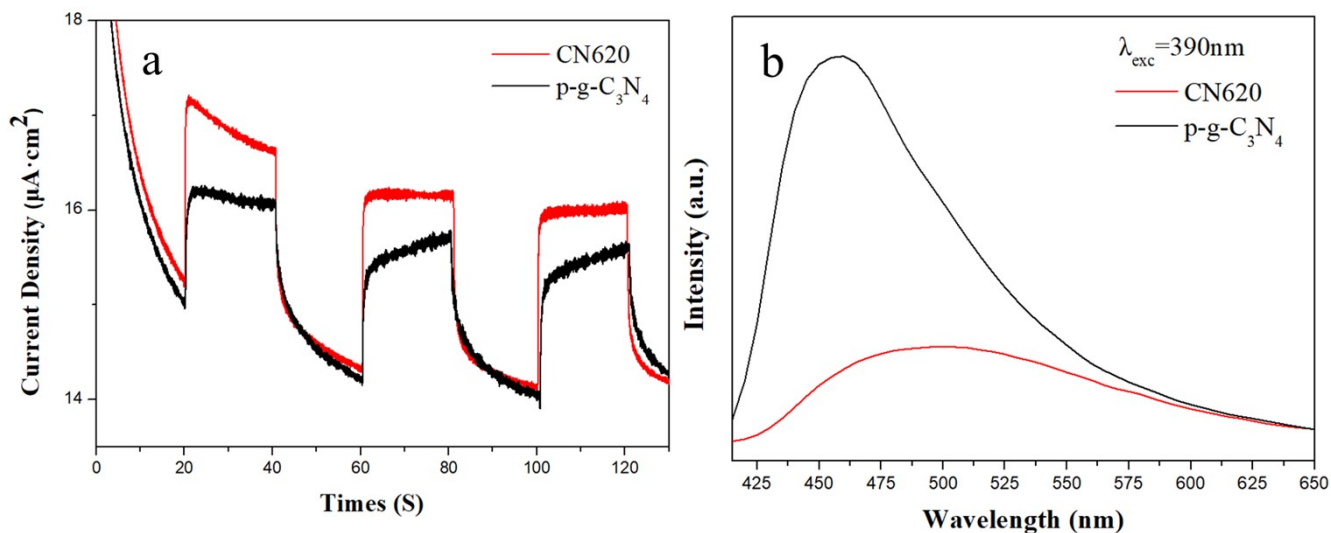

**Figure S3.** (a) Photocurrent responses and (b) PL emission spectra of CN620.

To prove the positive impact of nitrogen vacancies on separation and transportation of photogenerated electron-hole pairs under irradiation, the periodic on/off photocurrent response was measured over the samples. CN620 enhancement in photocurrent response as compared to p-g-C<sub>3</sub>N<sub>4</sub>. The charge separation efficiency was also investigated by photoluminescence spectra (PL) at an excitation wavelength of 390 nm. From p-g-C<sub>3</sub>N<sub>4</sub> to CN620, the PL intensity is significantly reduced, which indicates that the reorganization of the photogenerated electron-hole pairs of CN620 is reduced compared to p-g-C<sub>3</sub>N<sub>4</sub>.

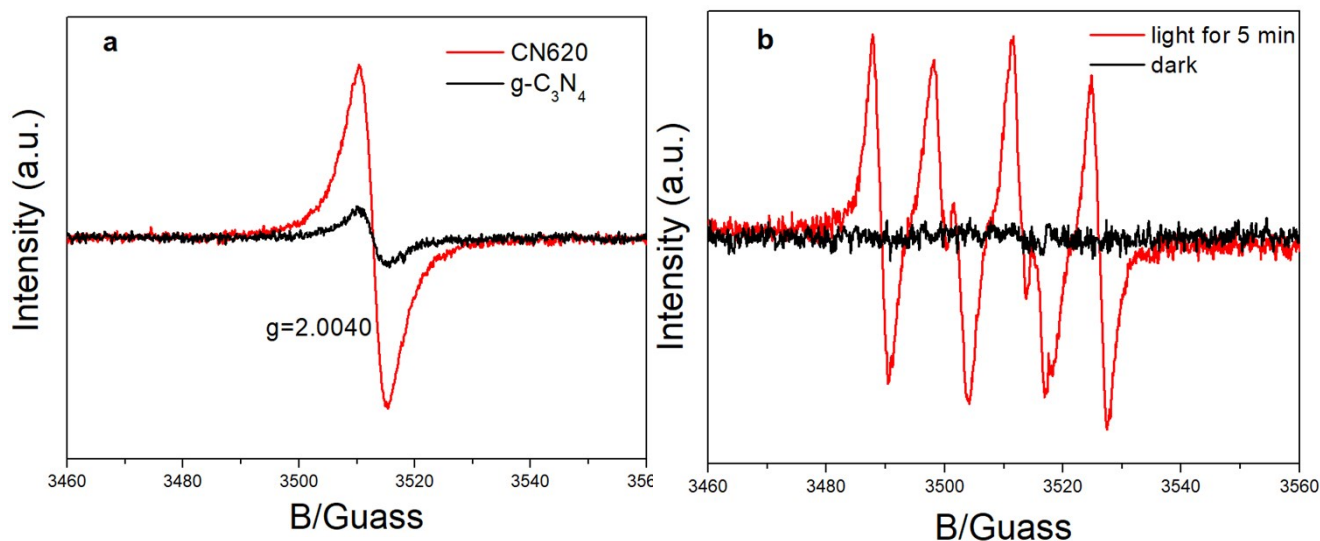

**Figure S4.** (a) EPR spectra of CN620 and g-C<sub>3</sub>N<sub>4</sub>. (b) ESR measurement for ·O<sub>2</sub><sup>-</sup> over CN620 composite.

The electron paramagnetic resonance (EPR) spectroscopy can provide fingerprint evidence for probing the surface vacancies in semiconductor photocatalysts.<sup>2</sup> As shown in Figure S4 (a), the EPR signal strength of CN620 is significantly higher than that of g-C<sub>3</sub>N<sub>4</sub>, revealing the increase of nitrogen vacancies generated in CN620. Figure S4 (b) shows, superoxide radical was detected by electron paramagnetic resonance (ESR).<sup>3</sup>

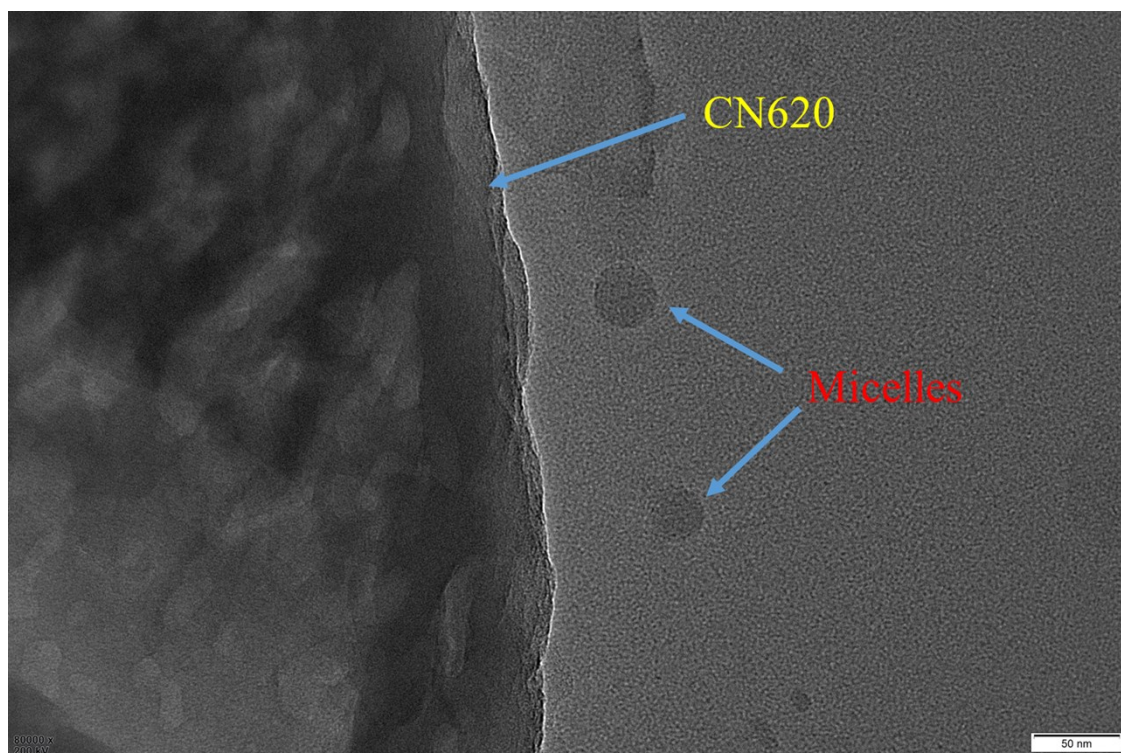

**Figure S5.** TEM images of CN620 and CTAB mixed solution

As can be seen from TEM, the nature of the micelles formed by CTAB was found to be spherical in shape. TEM also revealed that the micelle size distribution of CTAB aqueous solution is within 50 nm and CN620 is much larger than the micelle size. Therefore, the micelle is probably on the surface of the catalyst rather than the catalyst in the micelle.

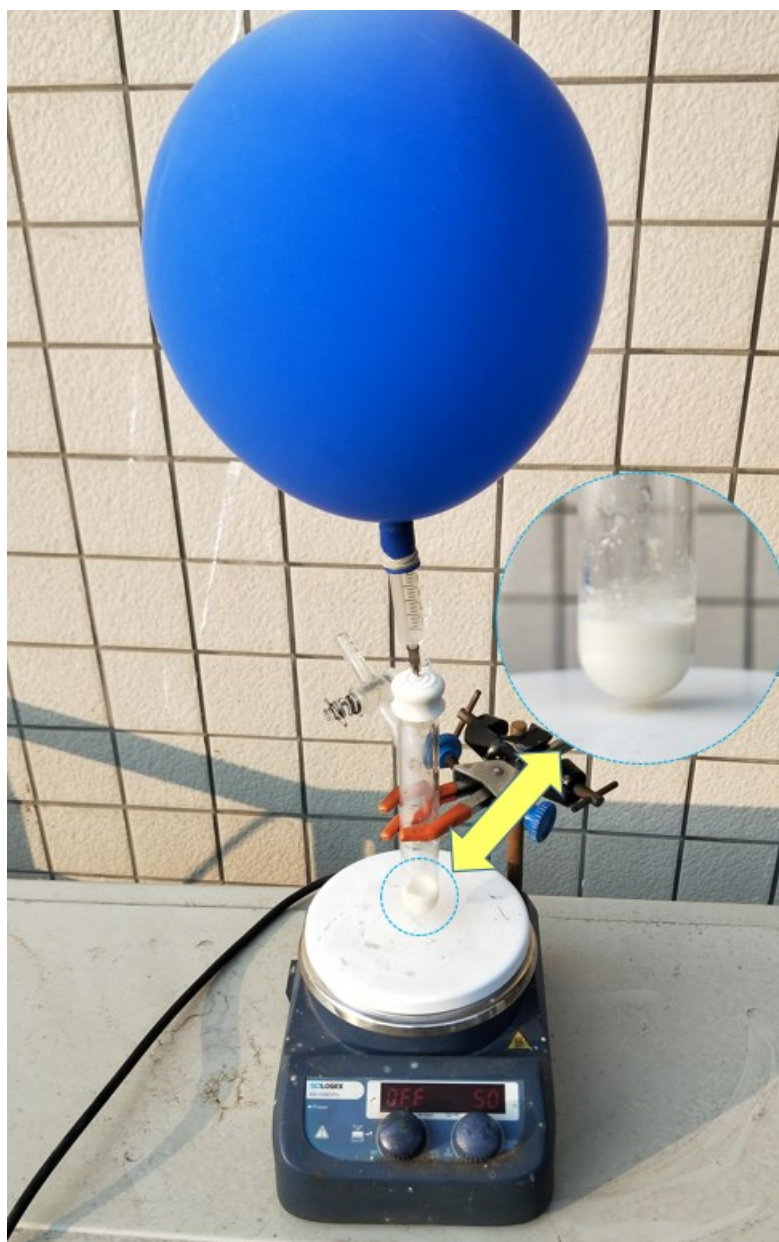

**Figure S6.** The photograph of outdoor equipment of sunlight-driven.

## References

- 1 P. Zhou, X. Hou, Y. Chao, W. Yang, W. Zhang, Z. Mu, J. Lai, F. Lv, K. Yang, Y. Liu, J. Li, J. Ma, J. Luo and S. Guo, *Chem Sci.*, 2019, **10**, 5898-5905.
- 2 W. Tu, Y. Xu, J. Wang, B. Zhang, T. Zhou, S. Yin, S. Wu, C. Li, Y. Huang, Y. Zhou, Z. Zou, J. Robertson, M. Kraft and R. Xu, *ACS Sustainable Chem. Eng.*, 2017, **5**, 7260-7268.
- 3 L. Wang, X. Zhang, X. Yu, F. Gao, Z. Shen, X. Zhang, S. Ge, J. Liu, Z. Gu and C. Chen, *Adv. Mater.*, 2019, **31**, 1901965.



## NMR data for characteristic compounds

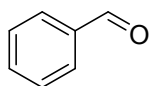

Benzaldehyde (**2a**). Colorless liquid (159mg, 75%).  $^1\text{H}$  NMR (400 MHz,  $\text{CDCl}_3$ )  $\delta$  10.03 (s, 1H), 7.97 – 7.84 (m, 2H), 7.70 – 7.58 (m, 1H), 7.54 (t,  $J$  = 7.5 Hz, 2H).  $^{13}\text{C}$  NMR (101 MHz,  $\text{CDCl}_3$ )  $\delta$  192.4, 136.4, 134.5, 129.7, 129.0. ESI-MS:  $m/z$  = 107  $[\text{M}+1]^+$ .

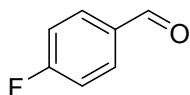

4-Fluorobenzaldehyde (**2b**). Colorless liquid (174mg, 70%).  $^1\text{H}$  NMR (400 MHz,  $\text{CDCl}_3$ )  $\delta$  9.98 (s, 1H), 8.02 – 7.82 (m, 2H), 7.22 (dd,  $J$  = 11.9, 5.2 Hz, 2H).  $^{13}\text{C}$  NMR (101 MHz,  $\text{CDCl}_3$ )  $\delta$  190.5, 167.8, 133.0, 133.0, 132.3, 132.2, 116.5, 116.2. ESI-MS:  $m/z$  = 125  $[\text{M}+1]^+$ .

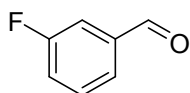

3-Fluorobenzaldehyde (**2c**). Colorless liquid (166mg, 67%).  $^1\text{H}$  NMR (400 MHz,  $\text{CDCl}_3$ )  $\delta$  10.01 (d,  $J$  = 1.9 Hz, 1H), 7.69 (dt,  $J$  = 7.6, 1.2 Hz, 1H), 7.63 – 7.50 (m, 2H), 7.35 (tdd,  $J$  = 8.3, 2.7, 1.0 Hz, 1H).  $^{13}\text{C}$  NMR (101 MHz,  $\text{CDCl}_3$ )  $\delta$  190.9, 190.9, 164.3, 161.9, 138.4, 138.4, 130.8, 130.8, 126.1, 126.1, 121.7, 121.5, 115.4, 115.2. ESI-MS:  $m/z$  = 125  $[\text{M}+1]^+$ .

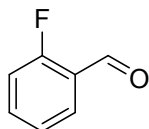

2-Fluorobenzaldehyde (**2d**). Colorless liquid (184mg, 74%).  $^1\text{H}$  NMR (400 MHz,  $\text{CDCl}_3$ )  $\delta$  10.37 (d,  $J$  = 0.5 Hz, 1H), 7.93 – 7.82 (m, 1H), 7.61 (dddd,  $J$  = 8.4, 7.3, 5.4, 1.9 Hz, 1H), 7.34 – 7.22 (m, 1H), 7.18 (ddd,  $J$  = 10.4, 8.4, 0.8 Hz, 1H).  $^{13}\text{C}$  NMR (101 MHz,  $\text{CDCl}_3$ )  $\delta$  187.3, 187.2, 166.0, 163.4, 136.4, 136.3, 128.7, 128.7, 124.7, 124.6, 116.6, 116.4. ESI-MS:  $m/z$  = 125  $[\text{M}+1]^+$ .

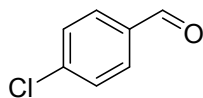

4-Chlorobenzaldehyde (**2e**). Colorless solid (204mg, 73%); m.p. 48°C.  $^1\text{H}$  NMR (400 MHz,  $\text{CDCl}_3$ )  $\delta$  10.00 (s, 1H), 7.89 – 7.80 (m, 2H), 7.61 – 7.49 (m, 2H).  $^{13}\text{C}$  NMR (101 MHz,  $\text{CDCl}_3$ )  $\delta$  197.3, 144.6, 140.1, 136.4, 134.5. ESI-MS:  $m/z$  = 141  $[\text{M}+1]^+$ .

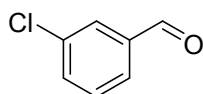

3-Chlorobenzaldehyde (**2f**). Colorless liquid (207mg, 74%).  $^1\text{H}$  NMR (400 MHz,  $\text{CDCl}_3$ )  $\delta$  9.98 (s, 1H), 7.85 (t,  $J$  = 1.8 Hz, 1H), 7.77 (dt,  $J$  = 7.6, 1.3 Hz, 1H), 7.60 (ddd,  $J$  = 8.0, 2.2, 1.2 Hz, 1H), 7.49 (t,  $J$  = 7.8 Hz, 1H).  $^{13}\text{C}$  NMR (101 MHz,  $\text{CDCl}_3$ )

$\delta$  190.8, 137.8, 135.4, 134.4, 130.4, 129.3, 128.0. ESI-MS:  $m/z$  =141  $[M+1]^+$ .

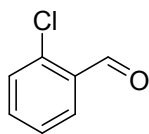

2-Chlorobenzaldehyde (**2g**). Colorless liquid (182mg, 65%).  $^1\text{H}$  NMR (400 MHz,  $\text{CDCl}_3$ )  $\delta$  10.48 (d,  $J$  = 0.8 Hz, 1H), 7.92 (dd,  $J$  = 7.7, 1.8 Hz, 1H), 7.53 (ddd,  $J$  = 8.1, 7.2, 1.8 Hz, 1H), 7.49 – 7.43 (m, 1H), 7.42 – 7.35 (m, 1H).  $^{13}\text{C}$  NMR (101 MHz,  $\text{CDCl}_3$ )  $\delta$  189.7, 137.9, 135.1, 132.5, 130.6, 129.4, 127.3. ESI-MS:  $m/z$  =141  $[M+1]^+$ .

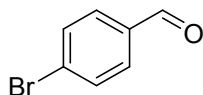

4-Bromobenzaldehyde (**2h**). Colorless solid (313mg, 85%); m.p. 55-58°C.  $^1\text{H}$  NMR (400 MHz,  $\text{CDCl}_3$ )  $\delta$  10.00 (s, 1H), 7.82 – 7.74 (m, 2H), 7.74 – 7.67 (m, 2H).  $^{13}\text{C}$  NMR (101 MHz,  $\text{CDCl}_3$ )  $\delta$  191.0, 135.1, 132.4, 131.0, 129.7. ESI-MS:  $m/z$  =185  $[M+1]^+$ .

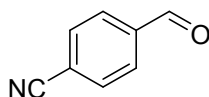

4-Formylbenzonitrile (**2i**). White crystalline Powder (228mg, 87%); m.p. 100-102°C.  $^1\text{H}$  NMR (400 MHz,  $\text{CDCl}_3$ )  $\delta$  10.10 (s, 1H), 8.04 – 7.96 (m, 2H), 7.90 – 7.81 (m, 2H).  $^{13}\text{C}$  NMR (101 MHz,  $\text{CDCl}_3$ )  $\delta$  190.7, 138.7, 132.9, 129.9, 117.7, 117.6. ESI-MS:  $m/z$  =132  $[M+1]^+$ .

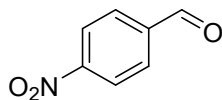

4-Nitrobenzaldehyde (**2j**). Yellow powder (269mg, 89%); m.p. 103-106°C.  $^1\text{H}$  NMR (400 MHz,  $\text{CDCl}_3$ )  $\delta$  10.18 (s, 1H), 8.41 (d,  $J$  = 8.7 Hz, 2H), 8.10 (d,  $J$  = 8.8 Hz, 2H).  $^{13}\text{C}$  NMR (101 MHz,  $\text{CDCl}_3$ )  $\delta$  190.3, 151.1, 140.1, 130.5, 124.3. ESI-MS:  $m/z$  =152  $[M+1]^+$ .

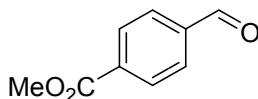

Methyl 4-formylbenzoate (**2k**). White solid (207mg, 63%); m.p. 59-63°C.  $^1\text{H}$  NMR (400 MHz,  $\text{CDCl}_3$ )  $\delta$  10.10 (s, 1H), 8.19 (d,  $J$  = 8.2 Hz, 2H), 8.01 – 7.89 (m, 2H), 3.96 (s, 3H).  $^{13}\text{C}$  NMR (101 MHz,  $\text{CDCl}_3$ )  $\delta$  191.6, 166.0, 139.2, 135.1, 130.2, 129.5, 52.5. ESI-MS:  $m/z$  =165  $[M+1]^+$ .

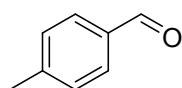

4-Methylbenzaldehyde (**2l**). Colorless liquid (161mg, 67%).  $^1\text{H}$  NMR (400 MHz,  $\text{CDCl}_3$ )  $\delta$  9.96 (s, 1H), 7.86 – 7.69 (m, 2H), 7.41 – 7.24 (m, 2H), 2.44 (s, 3H).  $^{13}\text{C}$  NMR (101 MHz,  $\text{CDCl}_3$ )  $\delta$  192.0, 145.5, 134.2, 130.2, 129.8, 129.7, 129.2, 21.8. ESI-MS:  $m/z$  =121  $[M+1]^+$ .

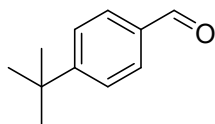

4-(Tert-butyl)benzaldehyde (**2m**). Faint yellow liquid (204mg, 63%).  $^1\text{H}$  NMR (400 MHz,  $\text{CDCl}_3$ )  $\delta$  10.01 (s, 1H), 7.84 (d,  $J = 8.4$  Hz, 2H), 7.58 (d,  $J = 8.3$  Hz, 2H), 1.38 (s, 9H).  $^{13}\text{C}$  NMR (101 MHz,  $\text{CDCl}_3$ )  $\delta$  192.0, 158.4, 134.1, 129.7, 126.0, 35.4, 31.1. ESI-MS:  $m/z = 163$   $[\text{M}+1]^+$ .

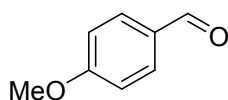

4-Methoxybenzaldehyde (**2n**). Colorless liquid (95mg, 35%).  $^1\text{H}$  NMR (400 MHz,  $\text{CDCl}_3$ )  $\delta$  9.89 (s, 1H), 7.84 (d,  $J = 8.9$  Hz, 2H), 7.01 (d,  $J = 8.7$  Hz, 2H), 3.89 (s, 3H).  $^{13}\text{C}$  NMR (101 MHz,  $\text{CDCl}_3$ )  $\delta$  190.8, 164.6, 132.0, 130.0, 114.3, 55.6. ESI-MS:  $m/z = 137$   $[\text{M}+1]^+$ .

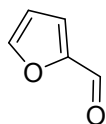

Furan-2-carbaldehyde (**2o**). Brown liquid (159mg, 86%).  $^1\text{H}$  NMR (400 MHz,  $\text{CDCl}_3$ )  $\delta$  9.62 (d,  $J = 0.4$  Hz, 1H), 7.74 – 7.53 (m, 1H), 7.23 (dd,  $J = 3.6, 0.7$  Hz, 1H), 6.58 (dd,  $J = 3.6, 1.7$  Hz, 1H).  $^{13}\text{C}$  NMR (101 MHz,  $\text{CDCl}_3$ )  $\delta$  177.9, 152.9, 148.1, 121.2, 112.6. ESI-MS:  $m/z = 97$   $[\text{M}+1]^+$ .

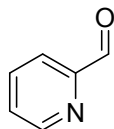

Picolinaldehyde (**2p**). Brown liquid (178mg, 83%).  $^1\text{H}$  NMR (400 MHz,  $\text{CDCl}_3$ )  $\delta$  10.01 (d,  $J = 0.8$  Hz, 1H), 8.72 (ddd,  $J = 4.8, 1.5, 1.0$  Hz, 1H), 7.94 – 7.85 (m, 1H), 7.82 (tdd,  $J = 7.8, 1.6, 0.8$  Hz, 1H), 7.47 (ddd,  $J = 7.5, 4.8, 1.4$  Hz, 1H).  $^{13}\text{C}$  NMR (101 MHz,  $\text{CDCl}_3$ )  $\delta$  193.3, 152.7, 150.2, 137.0, 127.8, 121.6. ESI-MS:  $m/z = 108$   $[\text{M}+1]^+$ .

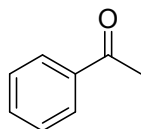

Acetophenone (**2q**). Colorless liquid (199mg, 83%).  $^1\text{H}$  NMR (400 MHz,  $\text{CDCl}_3$ )  $\delta$  8.02 – 7.95 (m, 2H), 7.62 – 7.54 (m, 1H), 7.52 – 7.44 (m, 2H), 2.62 (s, 3H).  $^{13}\text{C}$  NMR (126 MHz,  $\text{CDCl}_3$ )  $\delta$  184.4, 140.6, 132.9, 132.2, 128.6, 127.7, 127.1, 32.5. ESI-MS:  $m/z = 121$   $[\text{M}+1]^+$ .

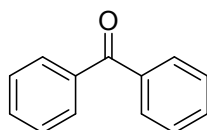

Benzophenone (**2r**). White solid (313mg, 86%); m.p. 47-51°C. <sup>1</sup>H NMR (400 MHz, CDCl<sub>3</sub>) δ 7.88 – 7.79 (m, 4H), 7.67 – 7.59 (m, 2H), 7.56 – 7.46 (m, 4H). <sup>13</sup>C NMR (101 MHz, CDCl<sub>3</sub>) δ 196.8, 137.6, 132.4, 130.1, 128.3. ESI-MS: m/z =183 [M+1]<sup>+</sup>.

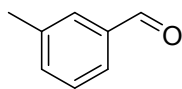

3-Methylbenzaldehyde (**4a**). Colorless liquid (95mg, 79%). <sup>1</sup>H NMR (400 MHz, CDCl<sub>3</sub>) δ 10.01 (s, 1H), 7.70 (dd, *J* = 6.9, 1.1 Hz, 2H), 7.54 – 7.36 (m, 2H), 2.46 (s, 3H). <sup>13</sup>C NMR (101 MHz, CDCl<sub>3</sub>) δ 192.6, 138.9, 136.5, 135.3, 130.0, 128.9, 127.2, 21.2. ESI-MS: m/z =121 [M+1]<sup>+</sup>.

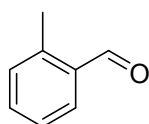

2-Methylbenzaldehyde (**4b**). Colorless liquid (88mg, 73%). <sup>1</sup>H NMR (400 MHz, CDCl<sub>3</sub>) δ 10.27 (s, 1H), 7.80 (dd, *J* = 7.6, 1.2 Hz, 1H), 7.48 (td, *J* = 7.5, 1.4 Hz, 1H), 7.36 (t, *J* = 7.5 Hz, 1H), 7.26 (d, *J* = 7.6 Hz, 1H), 2.67 (s, 3H). <sup>13</sup>C NMR (101 MHz, CDCl<sub>3</sub>) δ 192.8, 140.6, 134.1, 133.7, 132.1, 131.8, 126.3, 19.6. ESI-MS: m/z =121 [M+1]<sup>+</sup>.

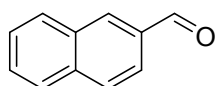

2-Naphthaldehyde (**4c**). Off-white to yellow solid (125mg, 80%); m.p. 58-61°C. <sup>1</sup>H NMR (400 MHz, CDCl<sub>3</sub>) δ 10.19 (s, 1H), 8.37 (s, 1H), 8.10 – 7.89 (m, 4H), 7.65 (dddd, *J* = 22.8, 8.1, 6.9, 1.3 Hz, 2H). <sup>13</sup>C NMR (101 MHz, CDCl<sub>3</sub>) δ 192.3, 136.5, 134.6, 134.1, 132.7, 129.5, 129.1, 129.1, 128.1, 127.1, 122.8. ESI-MS: m/z =157 [M+1]<sup>+</sup>.

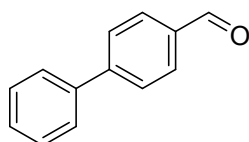

[1,1'-Biphenyl]-4-carbaldehyde (**4d**). Colorless solid (133mg, 73%); m.p. 57-59°C. <sup>1</sup>H NMR (400 MHz, CDCl<sub>3</sub>) δ 10.08 (s, 1H), 8.02 – 7.94 (m, 2H), 7.83 – 7.74 (m, 2H), 7.71 – 7.62 (m, 2H), 7.55 – 7.42 (m, 3H). <sup>13</sup>C NMR (101 MHz, CDCl<sub>3</sub>) δ 191.9, 147.2, 139.7, 135.2, 130.3, 129.1, 128.5, 127.7, 127.4. ESI-MS: m/z =183[M+1]<sup>+</sup>.

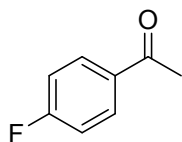

1-(4-Fluorophenyl)ethan-1-one (**4e**). Colorless liquid (89mg, 64%). <sup>1</sup>H NMR (400 MHz, CDCl<sub>3</sub>) δ 7.95 (dd, *J* = 8.9, 5.4 Hz, 2H), 7.20 – 6.97 (m, 2H), 2.55 (s, 3H). <sup>13</sup>C NMR (101 MHz, CDCl<sub>3</sub>) δ 196.4, 167.0, 164.5, 133.6, 133.6, 131.0, 130.9, 115.7, 115.5, 26.5. ESI-MS: m/z =139 [M+1]<sup>+</sup>.



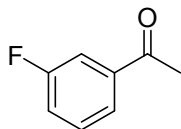

1-(3-Fluorophenyl)ethan-1-one (**4f**). Colorless liquid (86mg, 62%).  $^1\text{H}$  NMR (400 MHz,  $\text{CDCl}_3$ )  $\delta$  7.75 – 7.69 (m, 1H), 7.62 (ddd,  $J$  = 9.5, 2.4, 1.6 Hz, 1H), 7.43 (td,  $J$  = 8.0, 5.5 Hz, 1H), 7.30 – 7.20 (m, 1H), 2.59 (s, 3H).  $^{13}\text{C}$  NMR (101 MHz,  $\text{CDCl}_3$ )  $\delta$  196.7, 196.6, 164.1, 161.6, 139.2, 139.2, 130.3, 130.2, 124.1, 124.1, 120.2, 119.9, 115.0, 114.8, 26.6. ESI-MS:  $m/z$  = 139  $[\text{M}+1]^+$ .

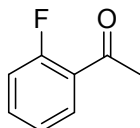

1-(2-Fluorophenyl)ethan-1-one (**4g**). Colorless liquid (70mg, 51%).  $^1\text{H}$  NMR (400 MHz,  $\text{CDCl}_3$ )  $\delta$  7.86 (td,  $J$  = 7.7, 1.9 Hz, 1H), 7.51 (dddd,  $J$  = 8.3, 7.1, 5.0, 1.9 Hz, 1H), 7.26 – 7.16 (m, 1H), 7.12 (ddd,  $J$  = 11.2, 8.3, 0.8 Hz, 1H), 2.63 (d,  $J$  = 4.9 Hz, 3H).  $^{13}\text{C}$  NMR (101 MHz,  $\text{CDCl}_3$ )  $\delta$  195.8, 195.8, 163.5, 160.9, 134.7, 134.6, 130.6, 130.5, 125.8, 125.7, 124.4, 124.3, 116.7, 116.5, 31.4, 31.3. ESI-MS:  $m/z$  = 139  $[\text{M}+1]^+$ .

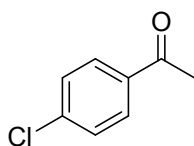

1-(4-Chlorophenyl)ethan-1-one (**4h**). Colorless liquid (108mg, 70%).  $^1\text{H}$  NMR (400 MHz,  $\text{CDCl}_3$ )  $\delta$  8.01 – 7.82 (m, 2H), 7.57 – 7.37 (m, 2H), 2.62 (s, 3H).  $^{13}\text{C}$  NMR (101 MHz,  $\text{CDCl}_3$ )  $\delta$  196.8, 139.6, 135.5, 129.7, 128.9, 26.5. ESI-MS:  $m/z$  = 155  $[\text{M}+1]^+$ .

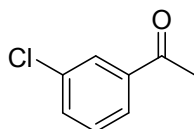

1-(3-Chlorophenyl)ethan-1-one (**4i**). Faint yellow liquid (103mg, 67%).  $^1\text{H}$  NMR (400 MHz,  $\text{CDCl}_3$ )  $\delta$  7.92 (t,  $J$  = 1.8 Hz, 1H), 7.86 – 7.80 (m, 1H), 7.53 (ddd,  $J$  = 8.0, 2.1, 1.1 Hz, 1H), 7.40 (t,  $J$  = 7.9 Hz, 1H), 2.59 (s, 3H).  $^{13}\text{C}$  NMR (101 MHz,  $\text{CDCl}_3$ )  $\delta$  196.6, 138.6, 134.9, 133.0, 129.9, 128.4, 126.4, 26.6. ESI-MS:  $m/z$  = 155  $[\text{M}+1]^+$ .

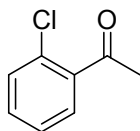

1-(2-Chlorophenyl)ethan-1-one (**4j**). Colorless liquid (72mg, 47%).  $^1\text{H}$  NMR (400 MHz,  $\text{CDCl}_3$ )  $\delta$  7.58 – 7.52 (m, 1H), 7.45 – 7.36 (m, 2H), 7.36 – 7.28 (m, 1H), 2.65 (s, 3H).  $^{13}\text{C}$  NMR (101 MHz,  $\text{CDCl}_3$ )  $\delta$  200.4, 139.2, 132.0, 131.3, 130.6, 129.4, 126.9, 30.7. ESI-MS:  $m/z$  = 155  $[\text{M}+1]^+$ .

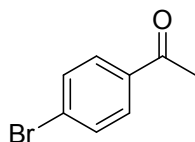

1-(4-Bromophenyl)ethan-1-one (**4k**). Colorless solid (123mg, 62%); m.p. 108-110°C.  $^1\text{H}$  NMR (400 MHz,  $\text{CDCl}_3$ )  $\delta$  7.87 – 7.78 (m, 2H), 7.65 – 7.55 (m, 2H), 2.59 (s, 3H).  $^{13}\text{C}$  NMR (101 MHz,  $\text{CDCl}_3$ )  $\delta$  197.0, 135.8, 131.9, 129.8, 128.3, 26.5. ESI-MS:  $m/z$  =199  $[\text{M}+1]^+$ .

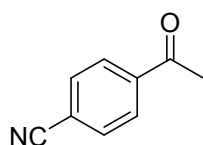

4-Acetylbenzonitrile (**4l**). Faint yellow crystalline powder (101mg, 70%); m.p. 56-59°C.  $^1\text{H}$  NMR (400 MHz,  $\text{CDCl}_3$ )  $\delta$  8.17 – 7.95 (m, 2H), 7.76 (d,  $J$  = 8.5 Hz, 2H), 2.63 (s, 3H).  $^{13}\text{C}$  NMR (101 MHz,  $\text{CDCl}_3$ )  $\delta$  196.5, 139.9, 132.5, 128.7, 117.9, 116.4, 26.7. ESI-MS:  $m/z$  =146  $[\text{M}+1]^+$ .

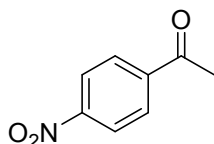

1-(4-Nitrophenyl)ethan-1-one (**4m**). Light yellow crystal (119mg, 72%); m.p. 75-78°C.  $^1\text{H}$  NMR (400 MHz,  $\text{CDCl}_3$ )  $\delta$  8.30 (d,  $J$  = 8.9 Hz, 2H), 8.18 – 8.02 (m, 2H), 2.68 (s, 3H).  $^{13}\text{C}$  NMR (101 MHz,  $\text{CDCl}_3$ )  $\delta$  196.3, 150.4, 141.4, 129.3, 123.8, 26.9. ESI-MS:  $m/z$  =166  $[\text{M}+1]^+$ .

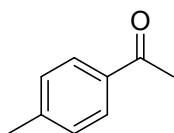

1-(P-tolyl)ethan-1-one (**4n**). Colorless liquid (75mg, 56%).  $^1\text{H}$  NMR (400 MHz,  $\text{CDCl}_3$ )  $\delta$  7.88 (d,  $J$  = 8.2 Hz, 2H), 7.41 – 7.20 (m, 2H), 2.61 (s, 3H), 2.44 (s, 3H).  $^{13}\text{C}$  NMR (101 MHz,  $\text{CDCl}_3$ )  $\delta$  197.8, 143.9, 134.8, 129.2, 128.4, 26.5, 21.6. ESI-MS:  $m/z$  =135  $[\text{M}+1]^+$ .

# NMR Spectra

Compound 2a

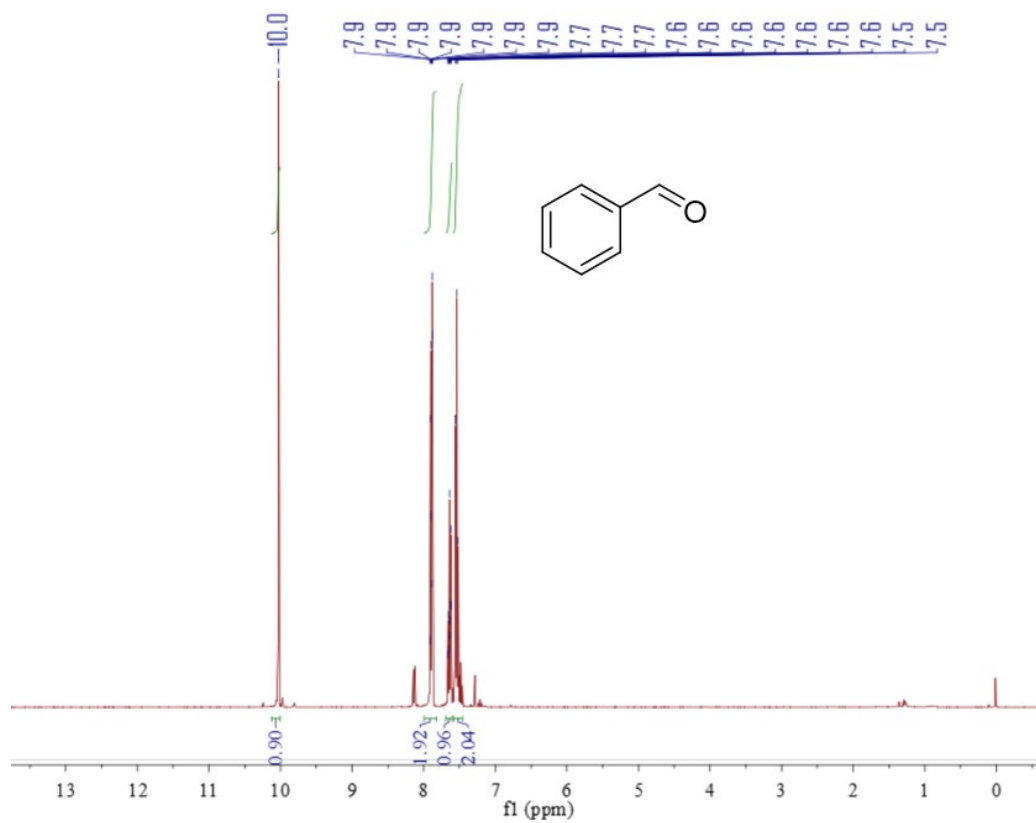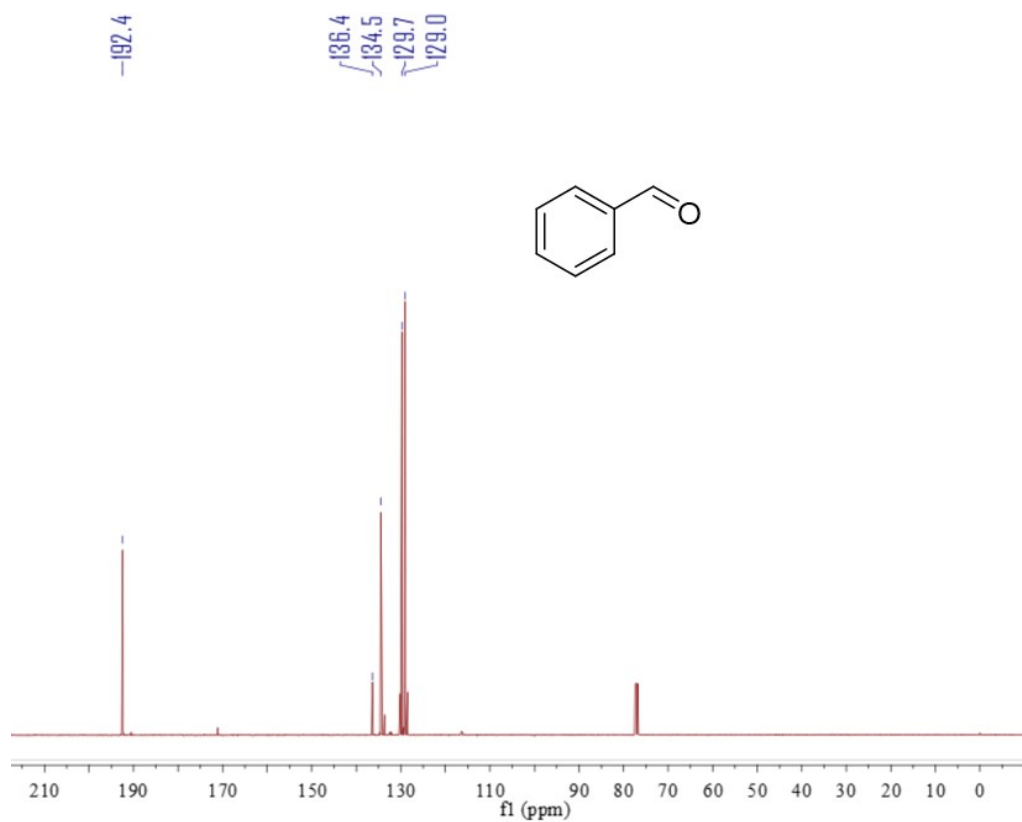

Compound 2b

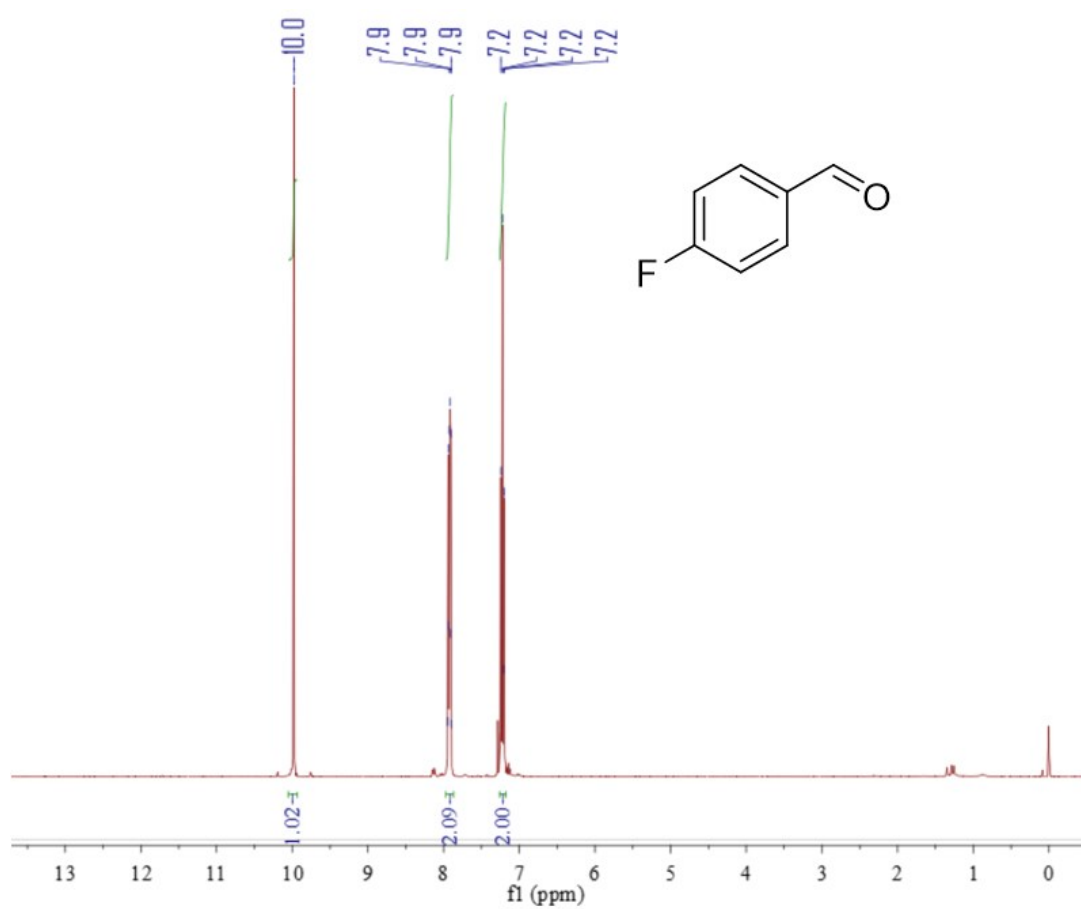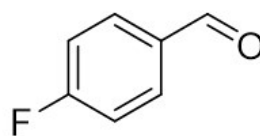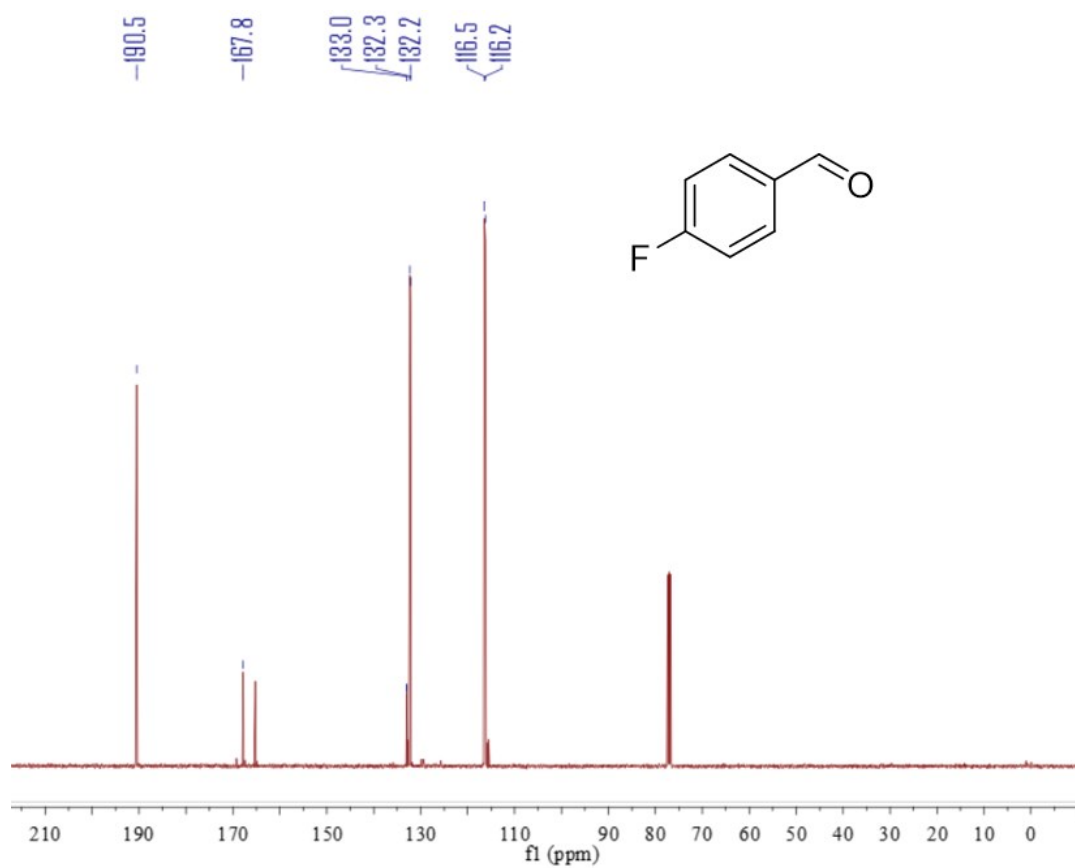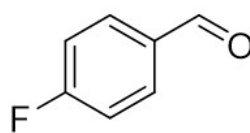

Compound 2c

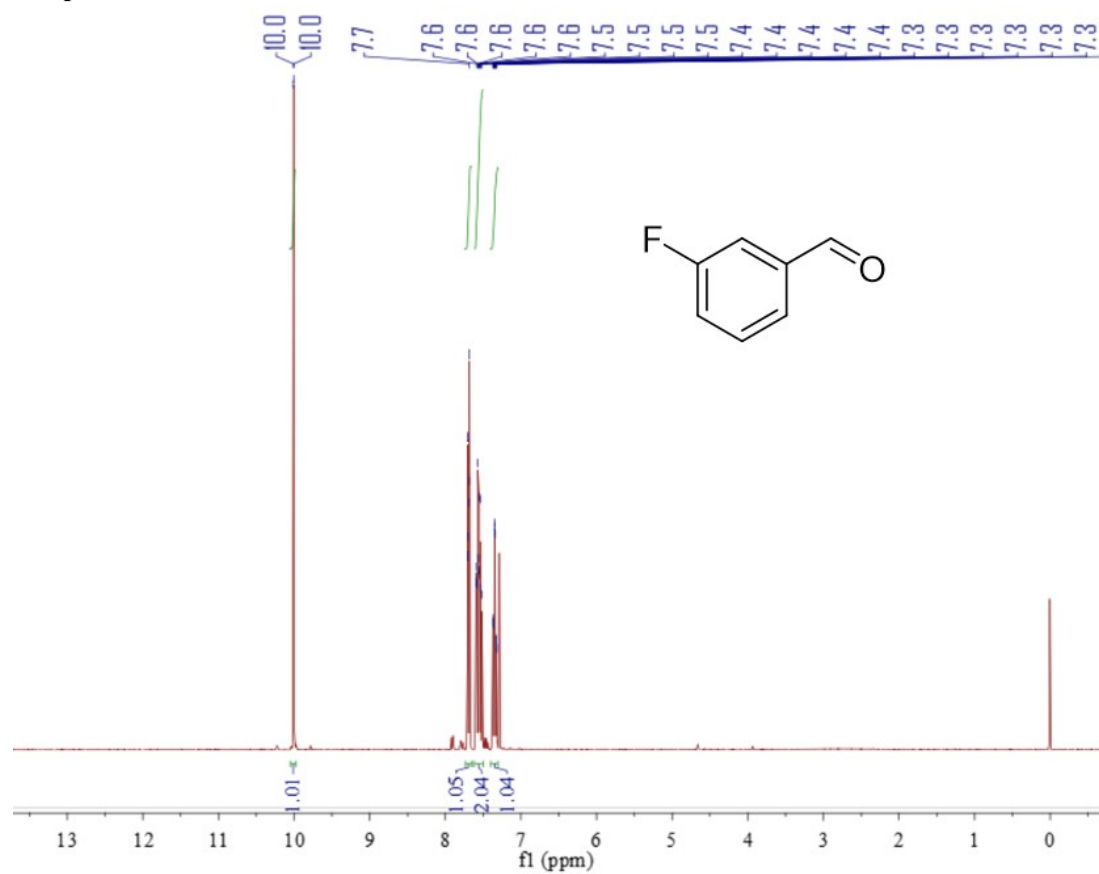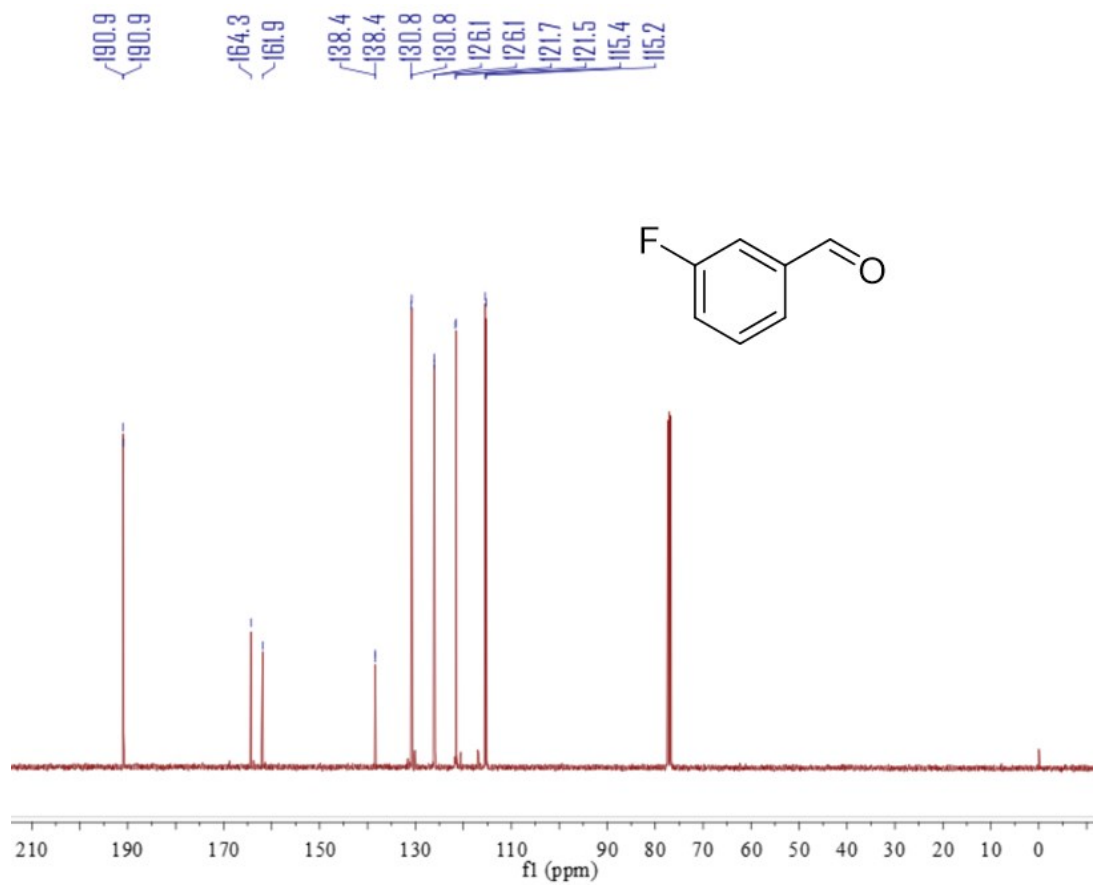

Compound 2d

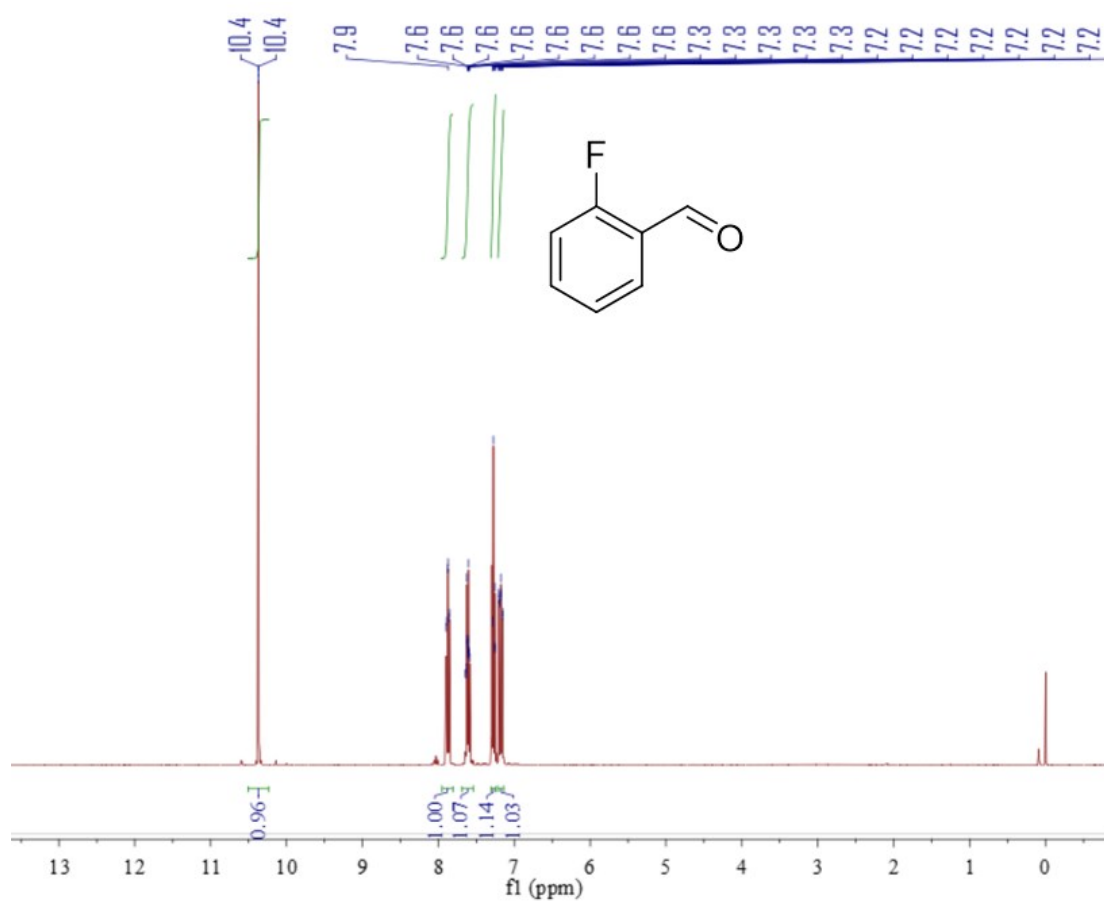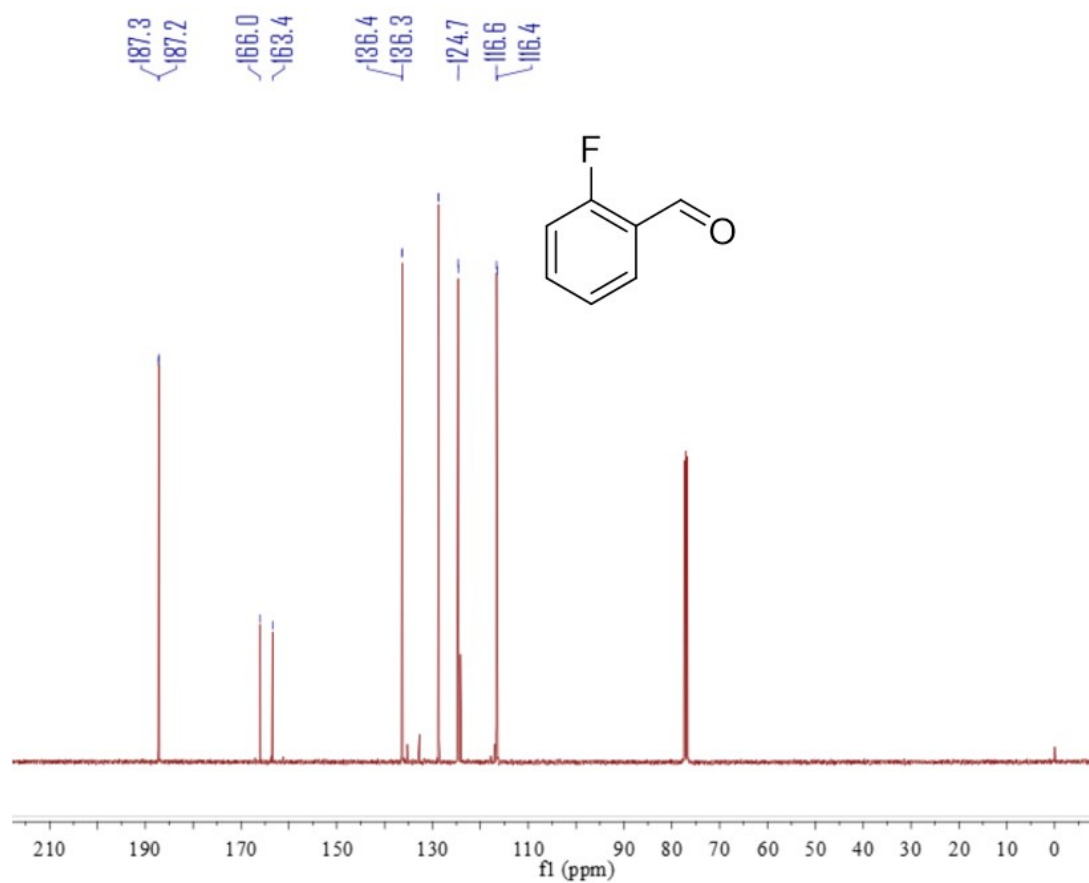

Compound 2e

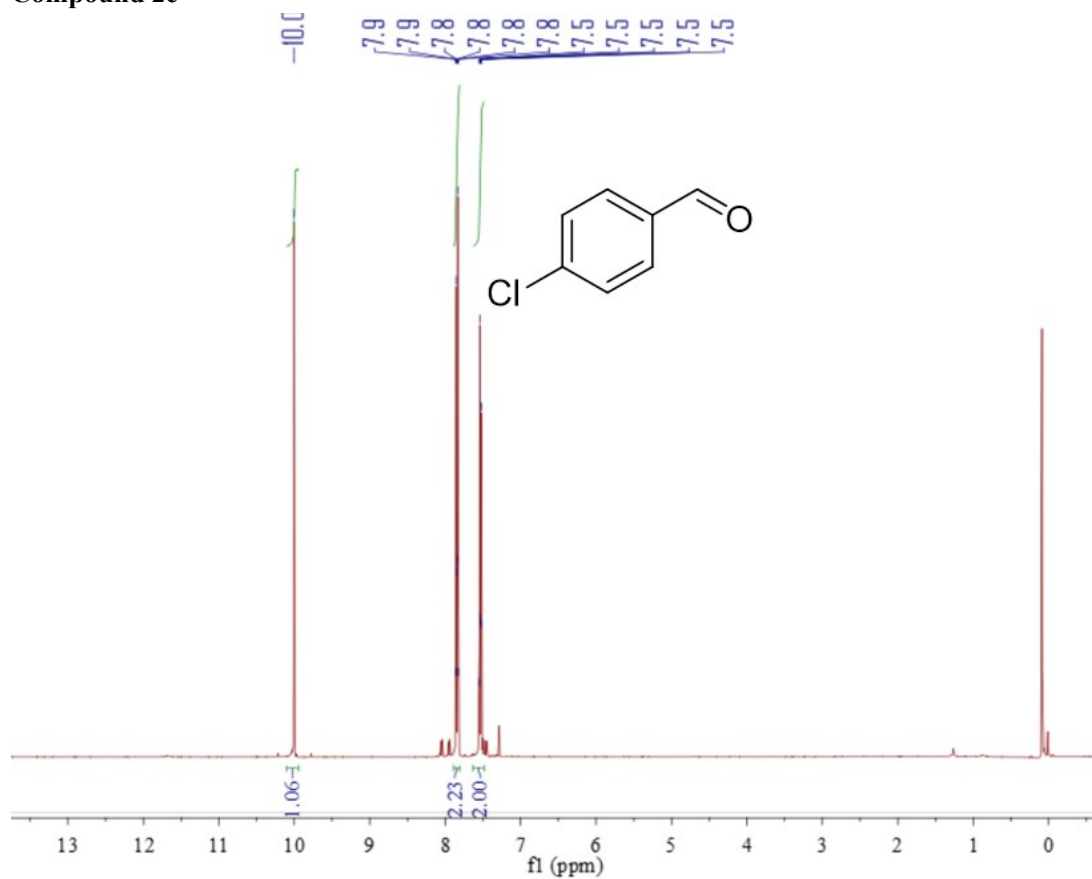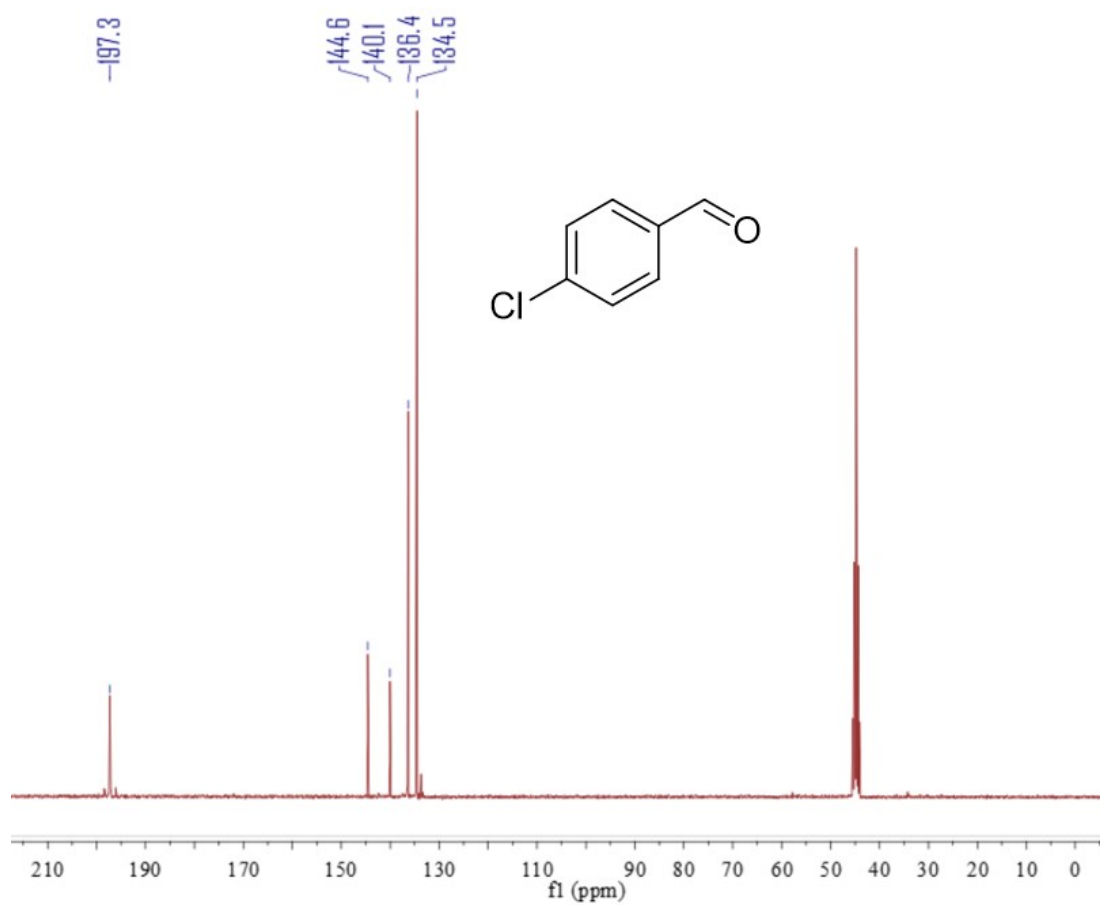

Compound 2f

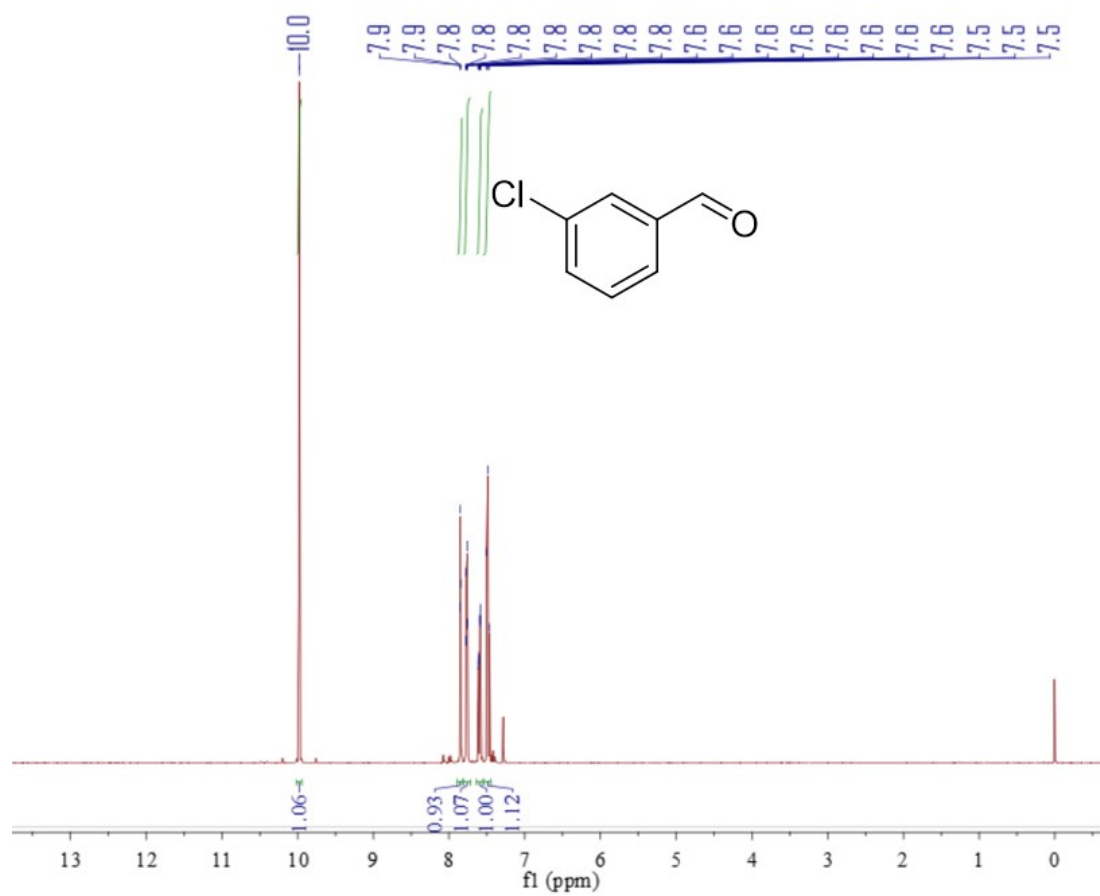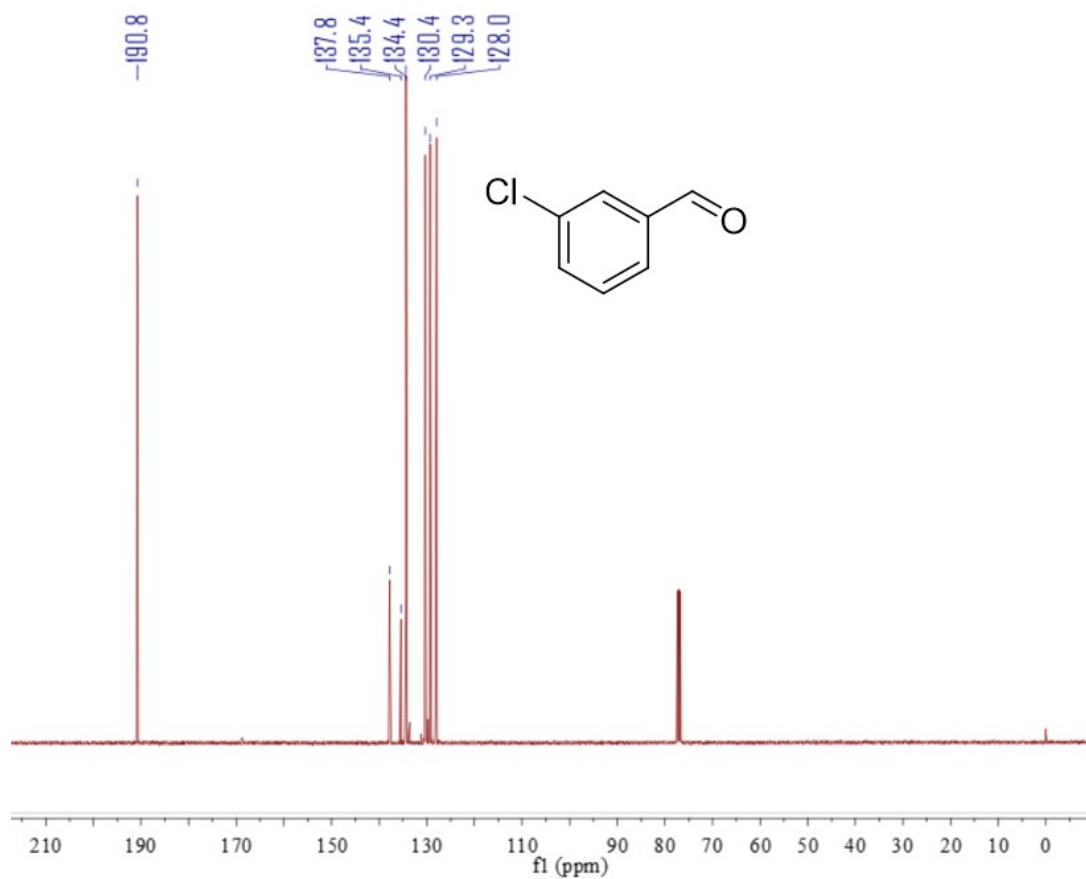



Compound 2g

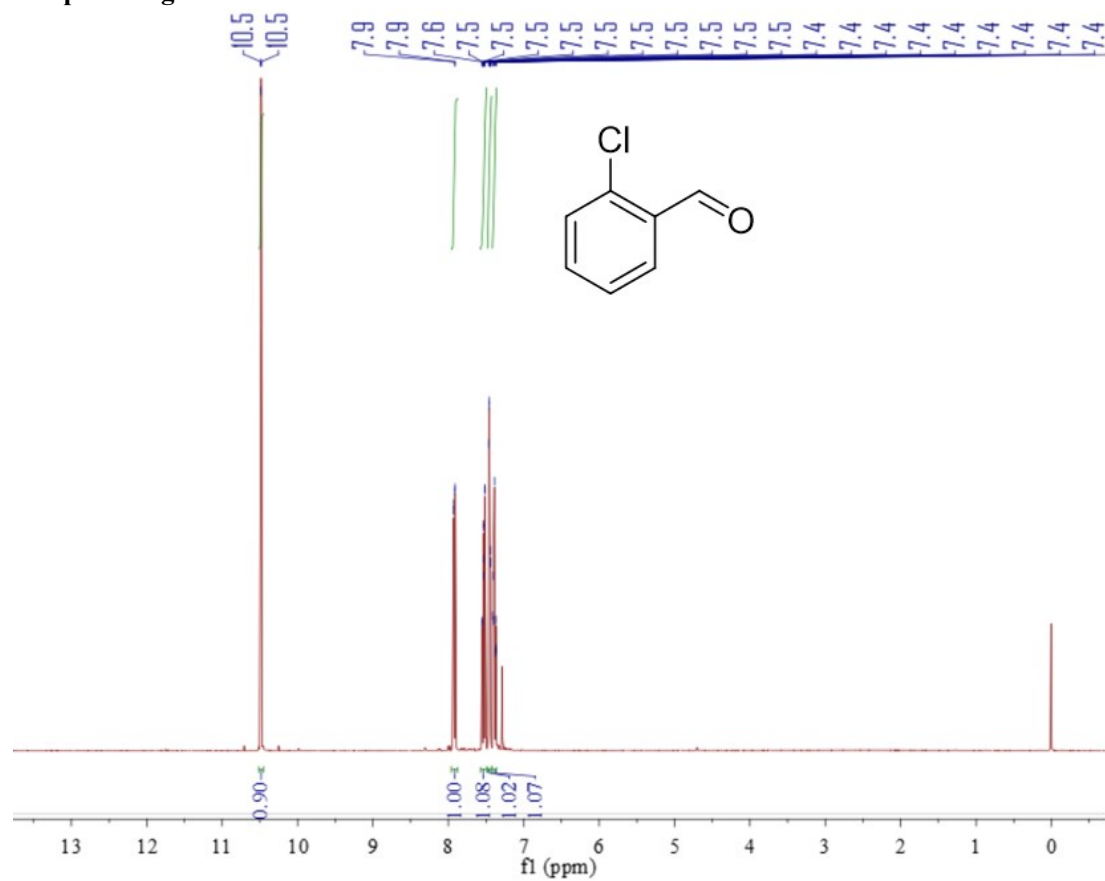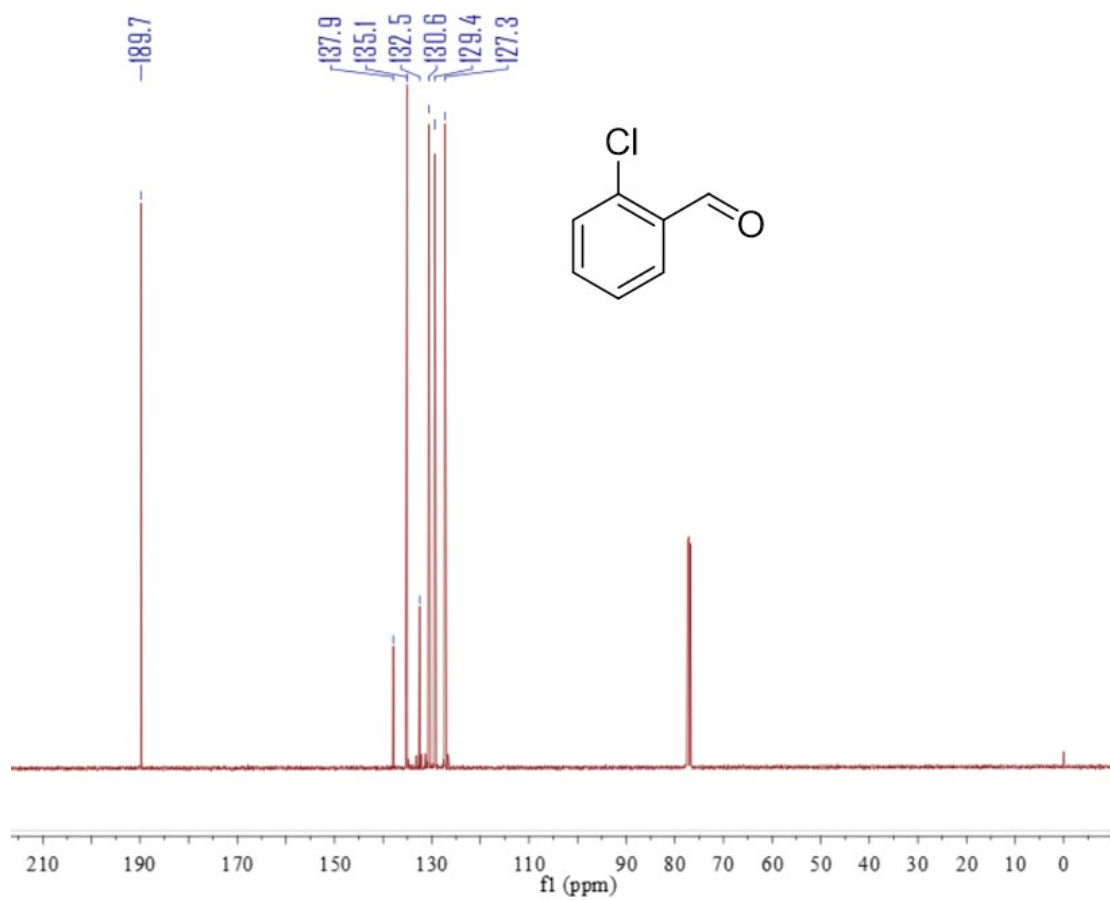

Compound 2h

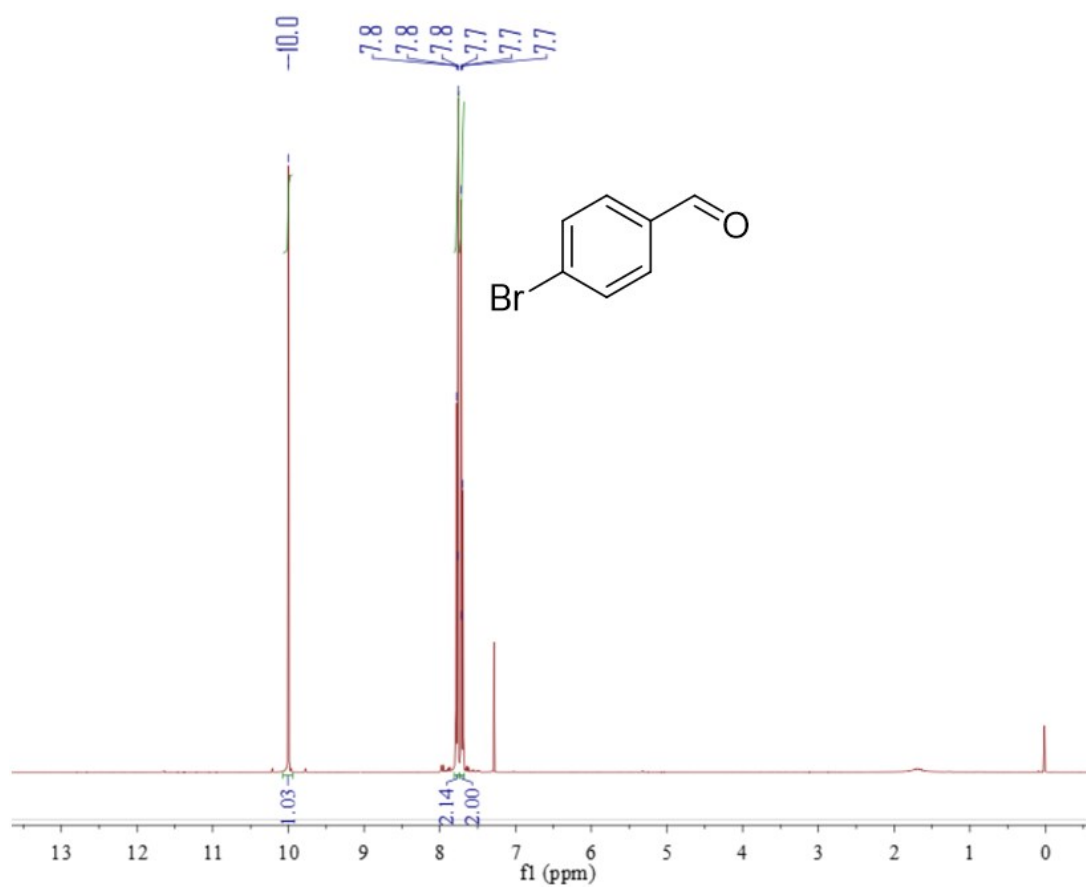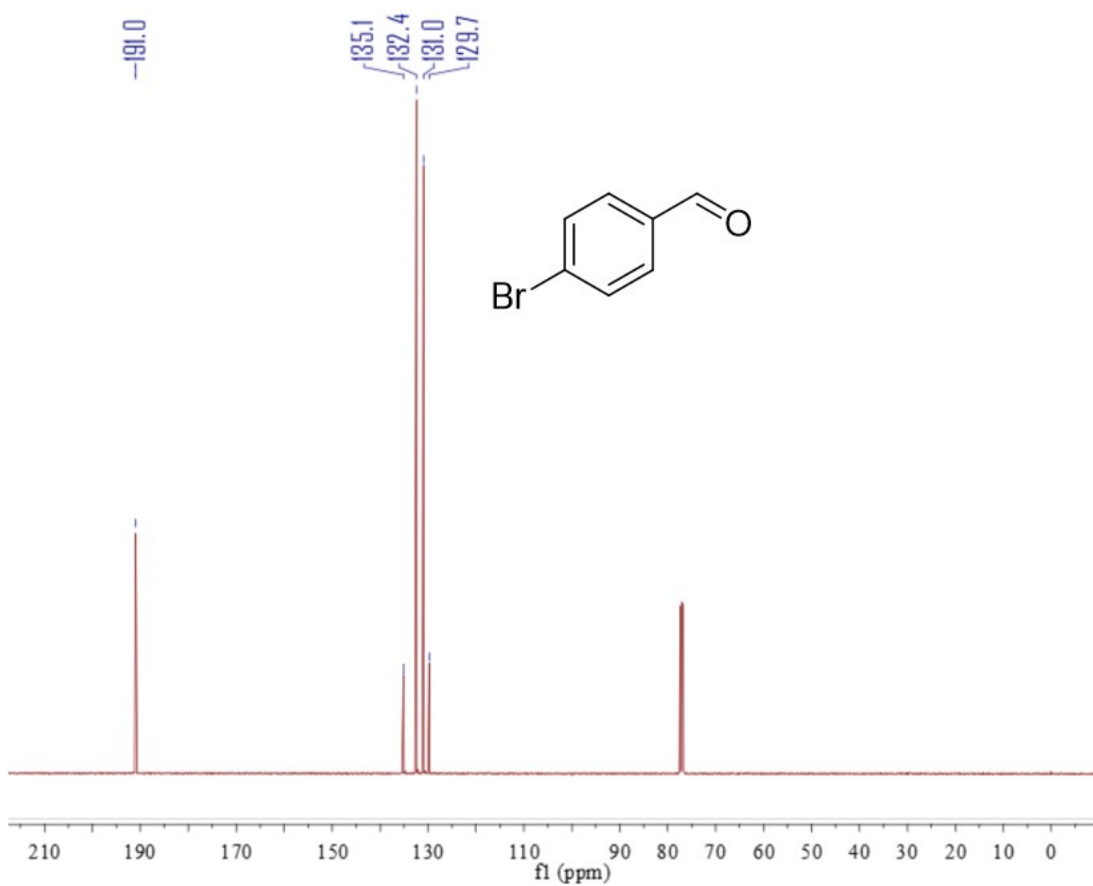

Compound 2i

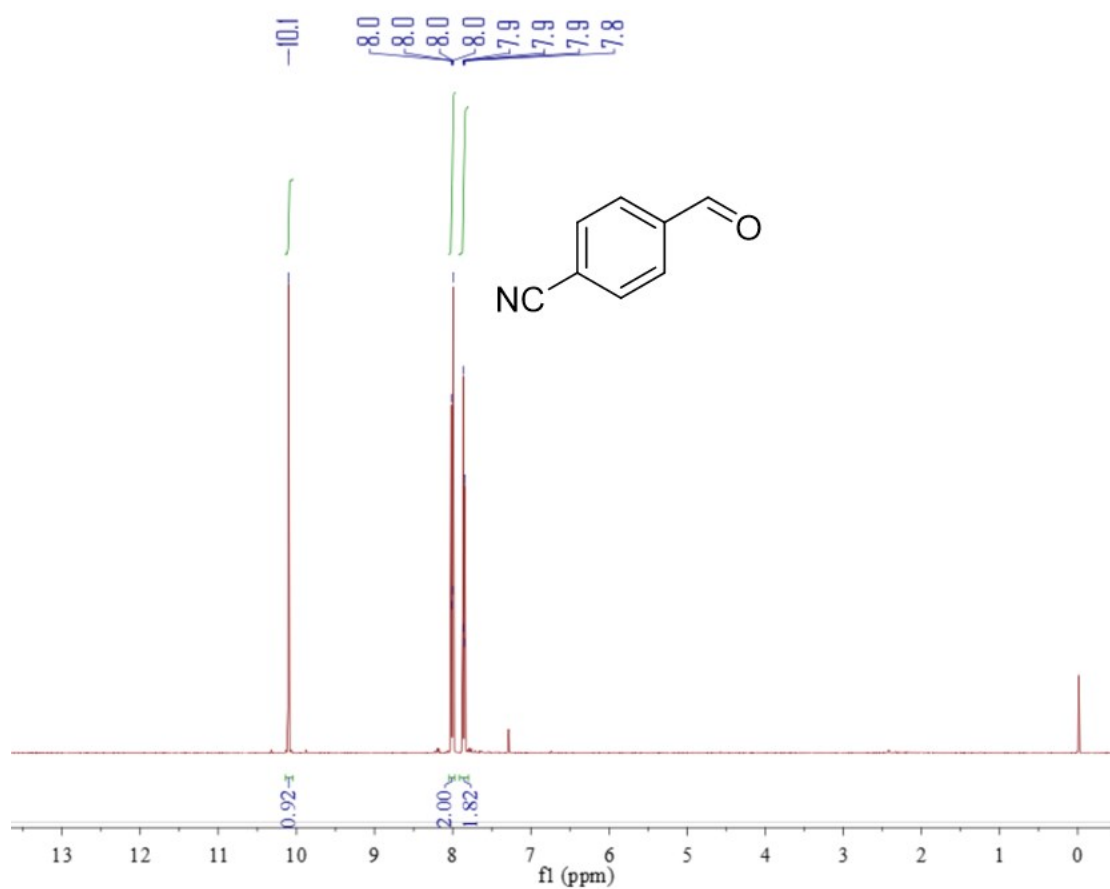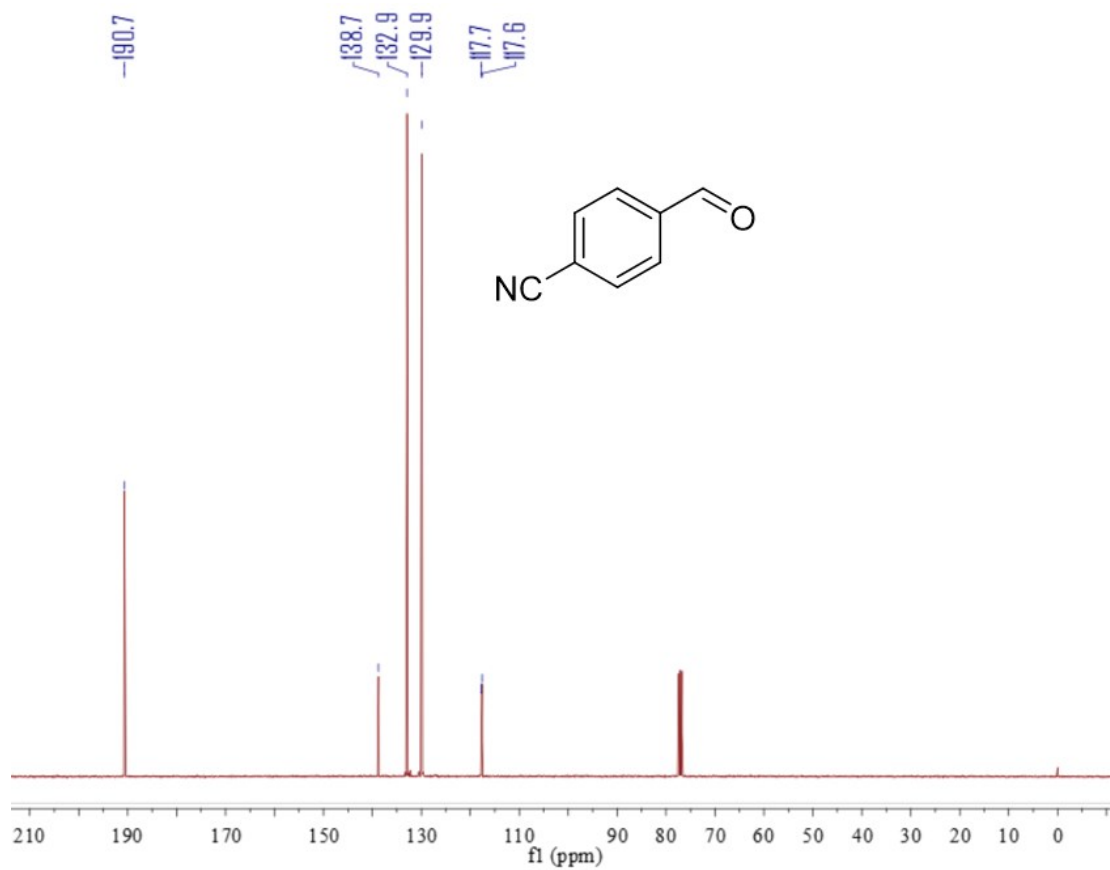

Compound 2j

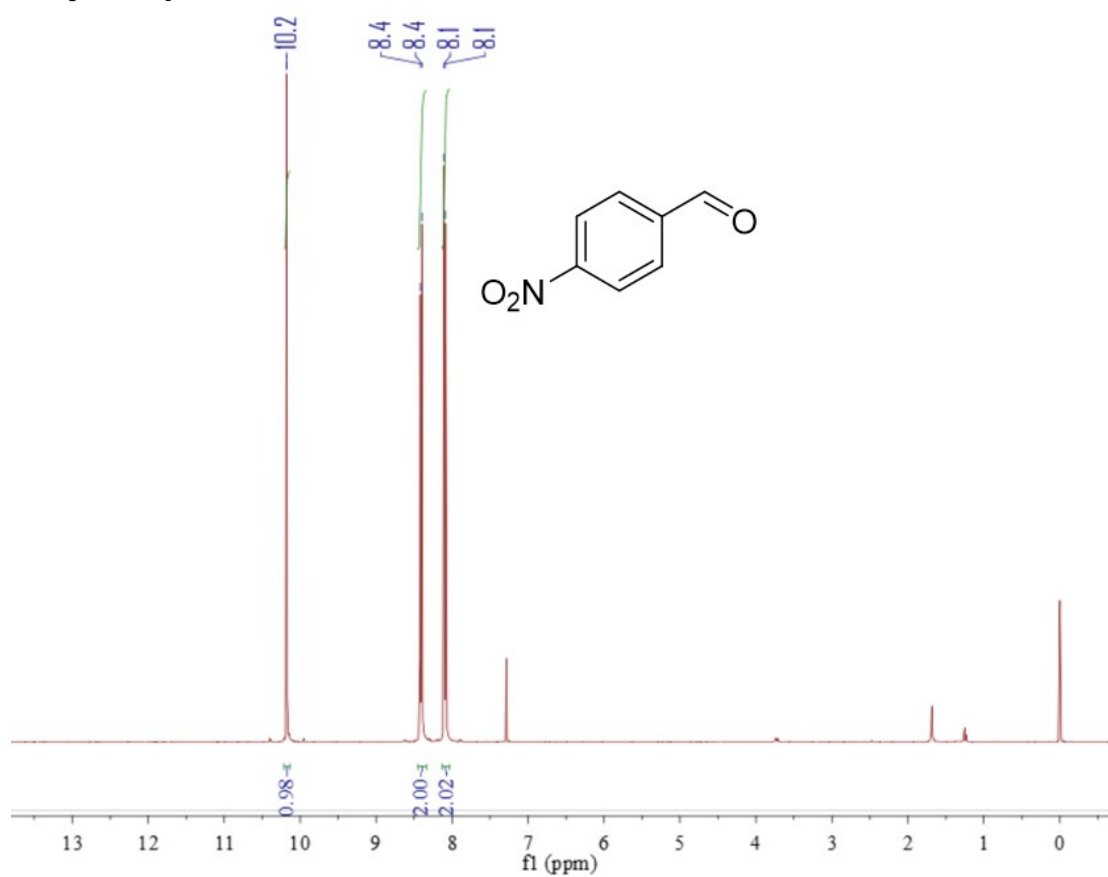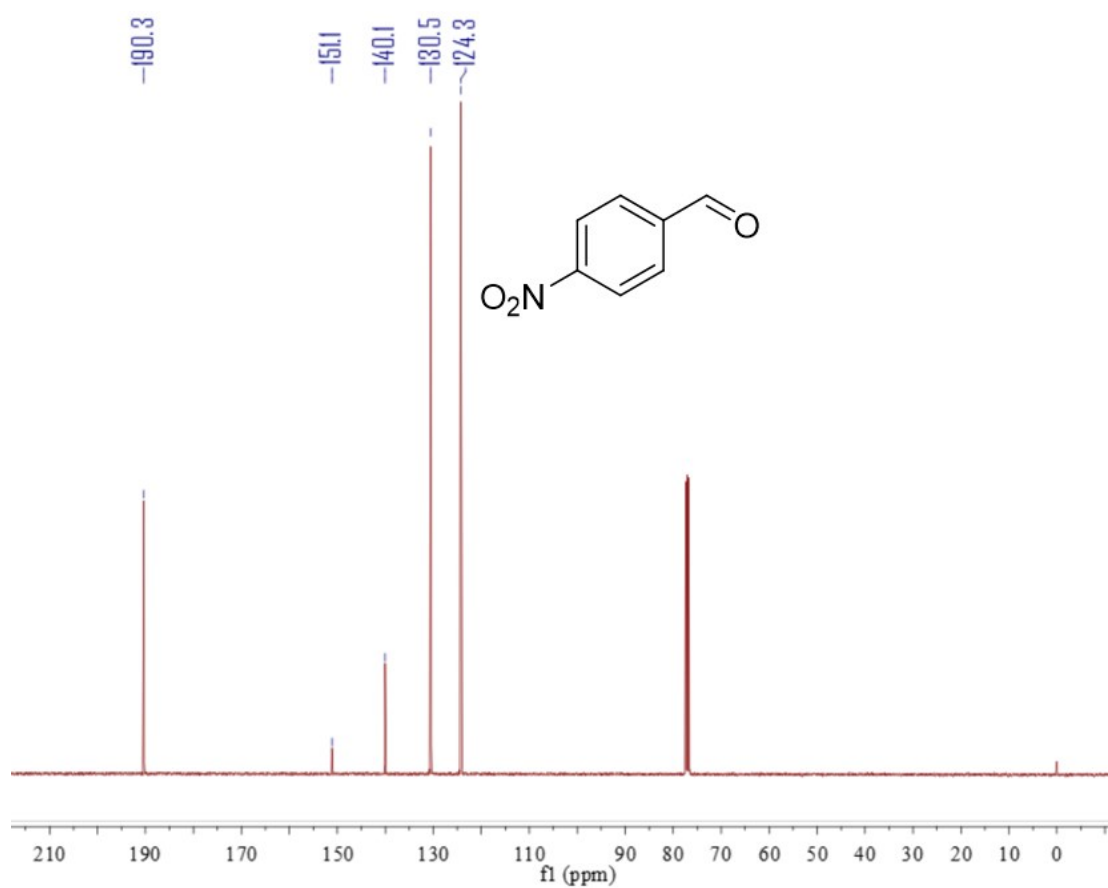

Compound 2k

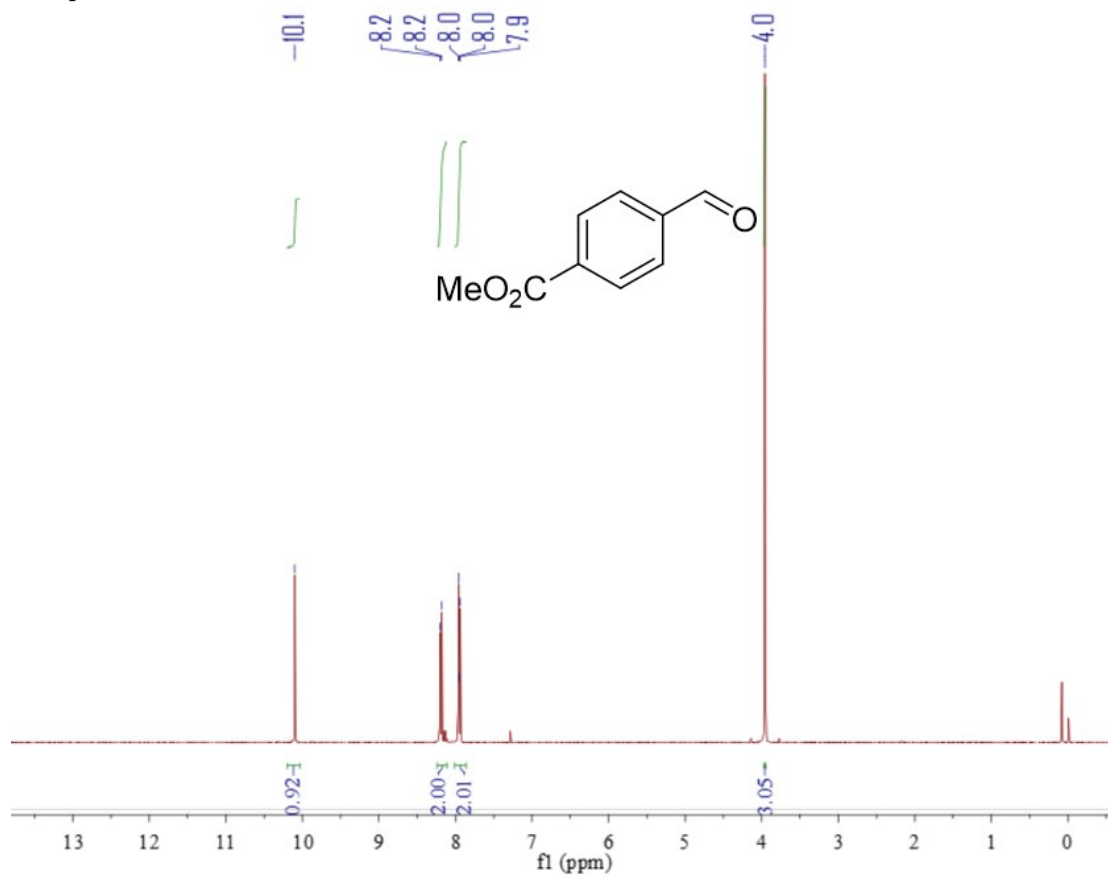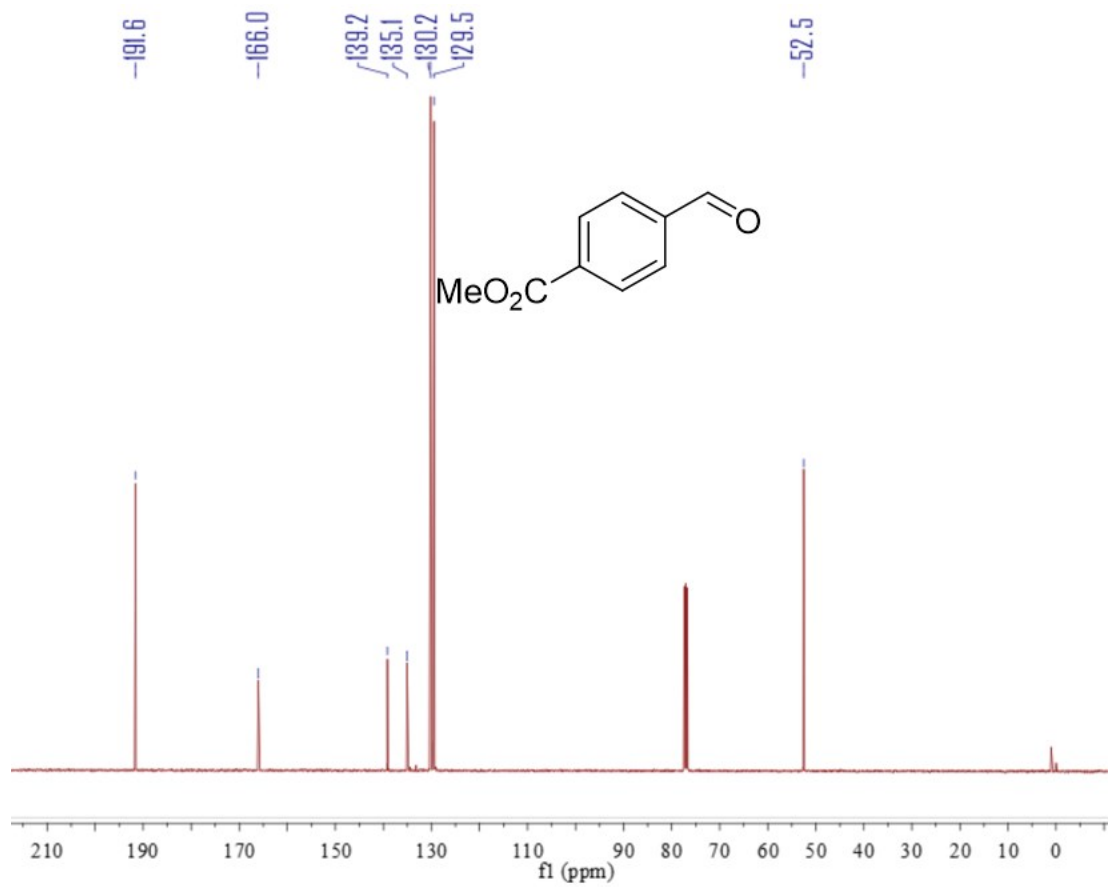

Compound 2l

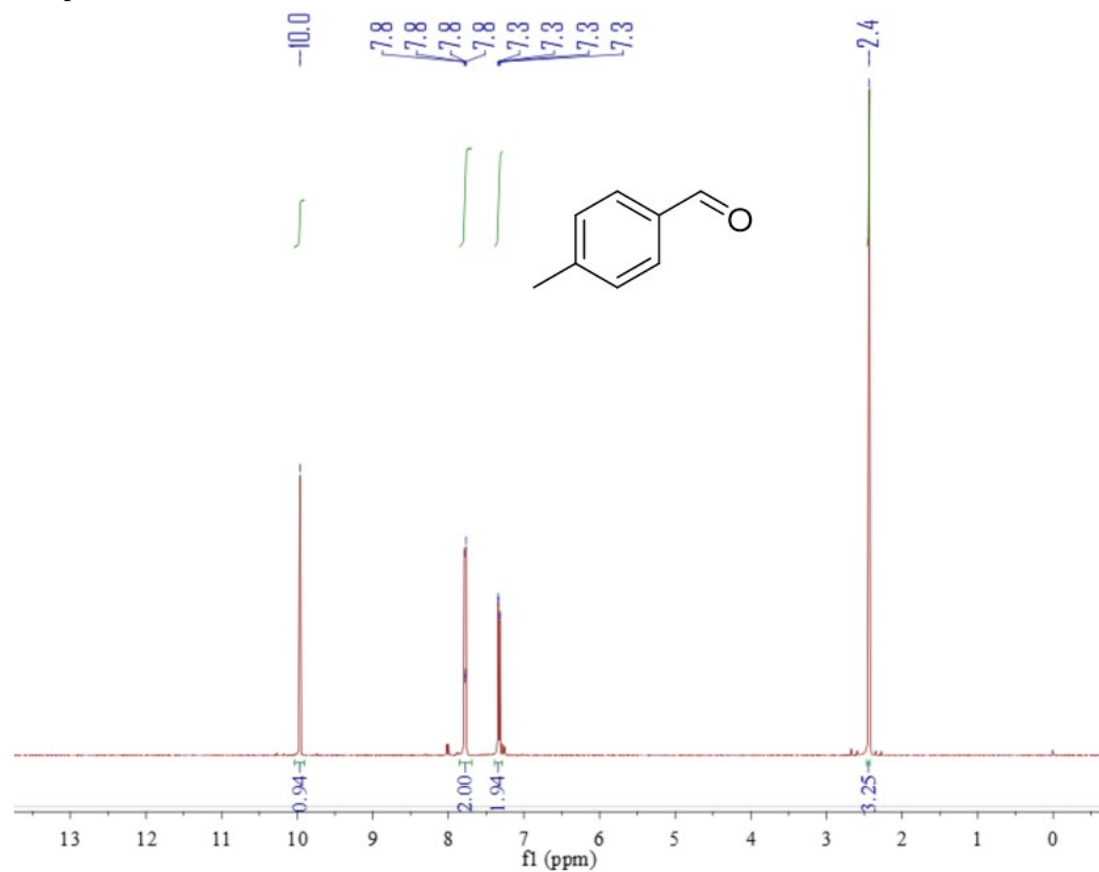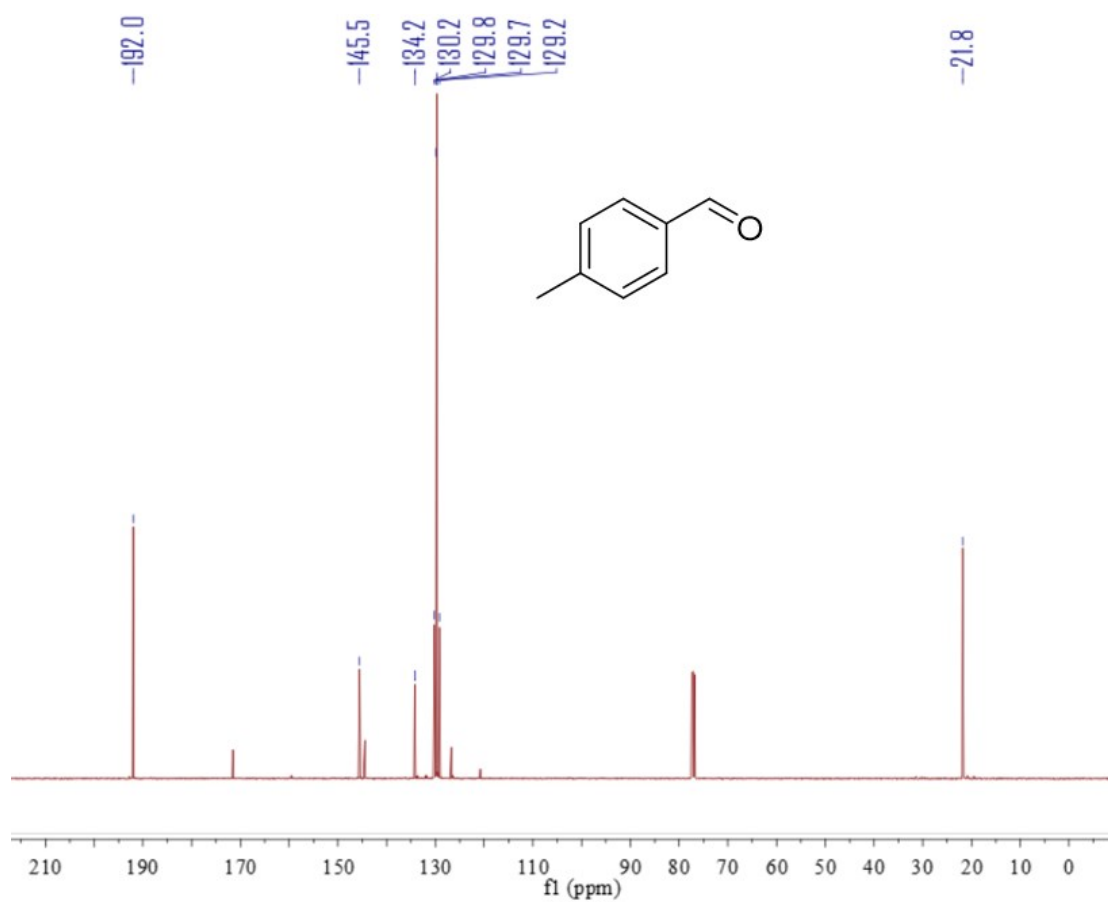

Compound 2m

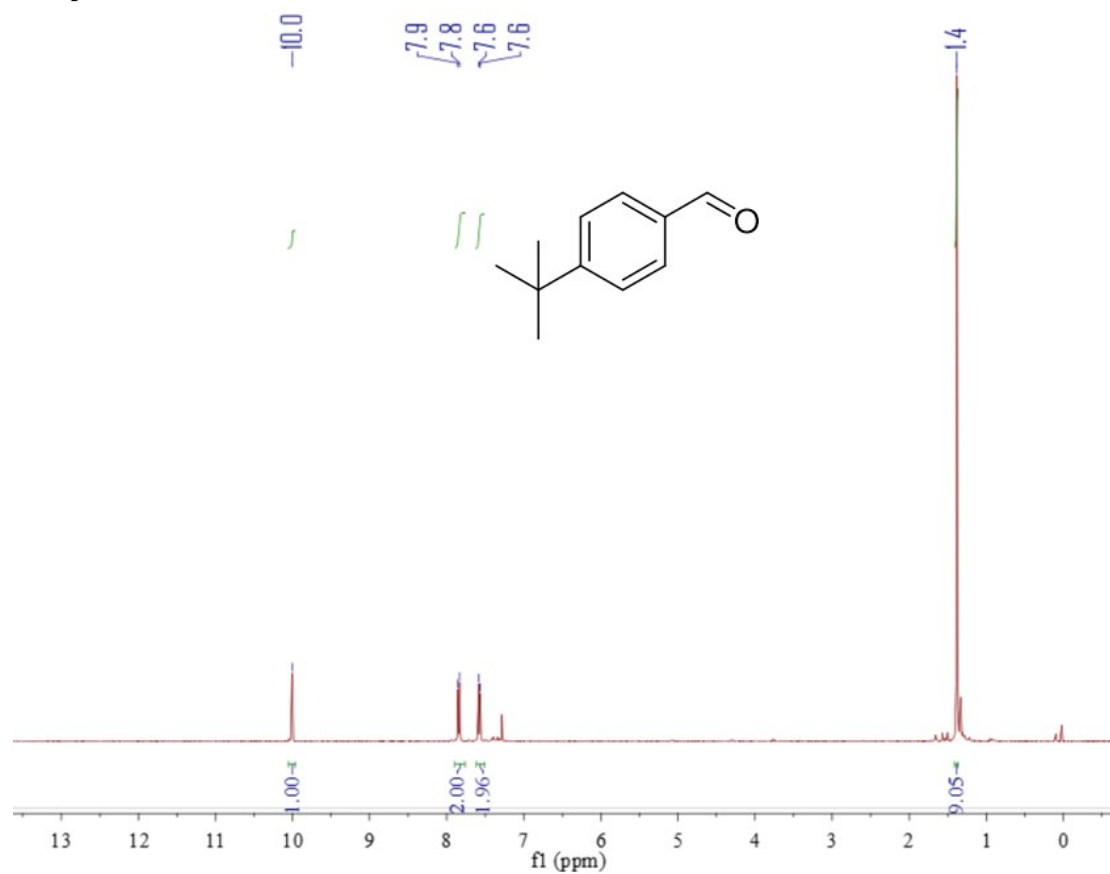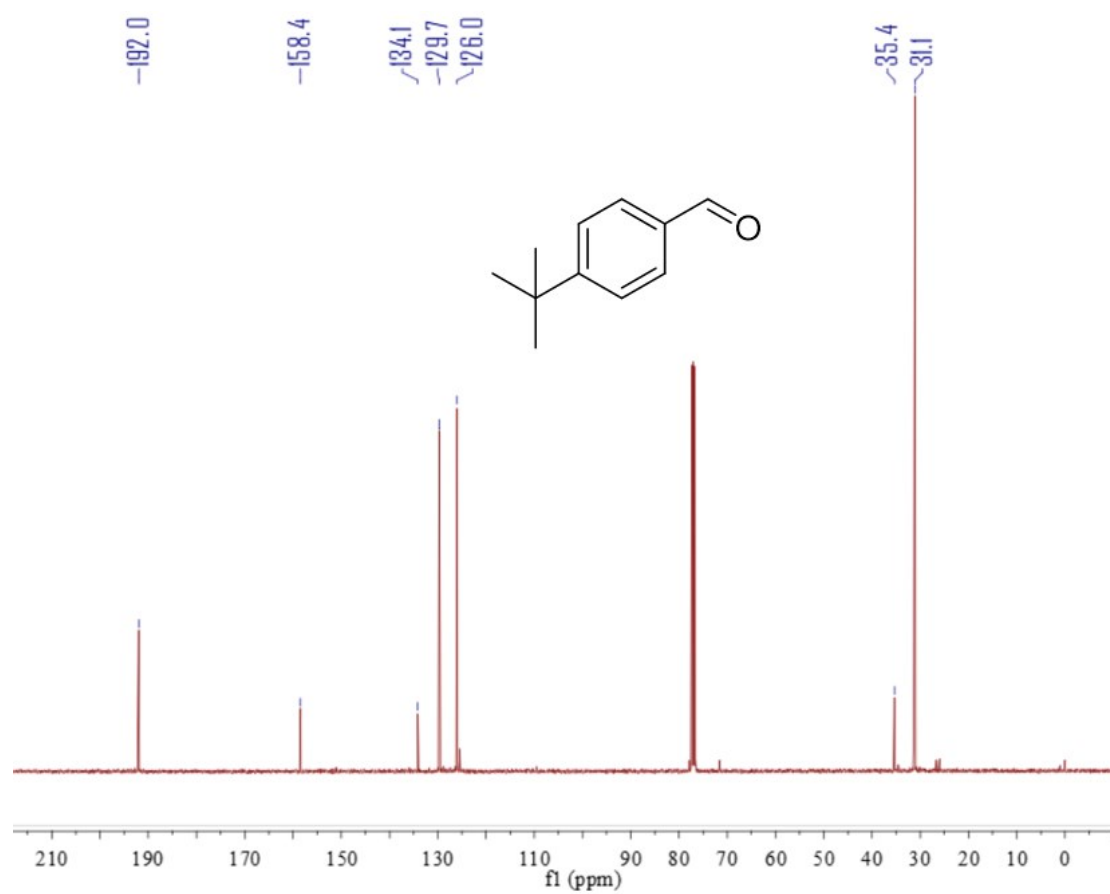

Compound 2n

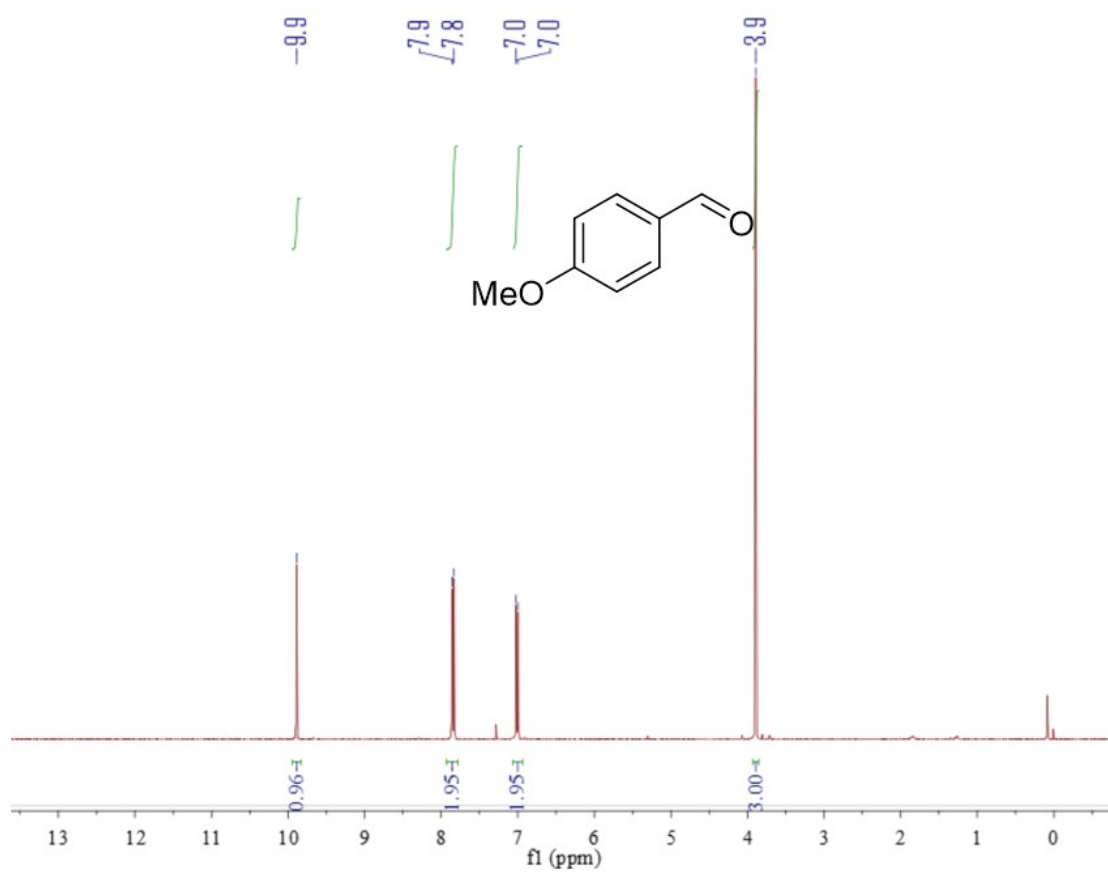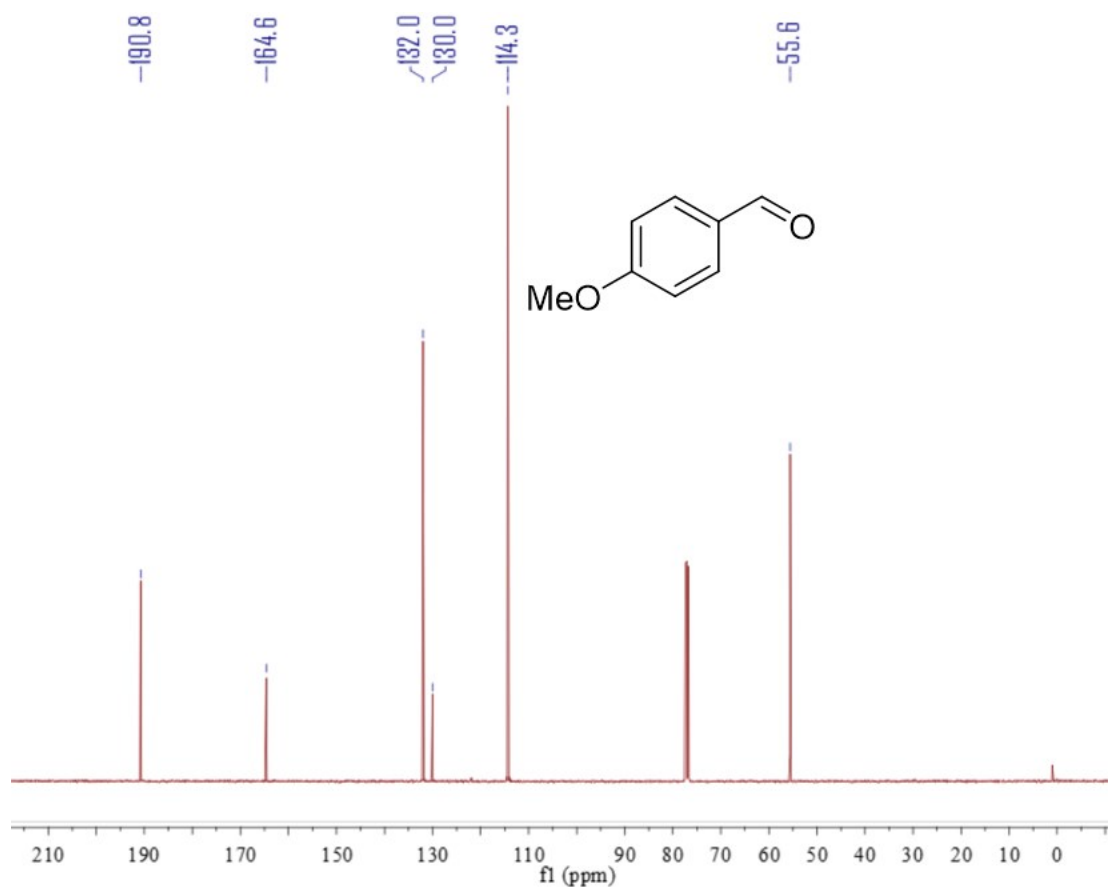



**Compound 2o**

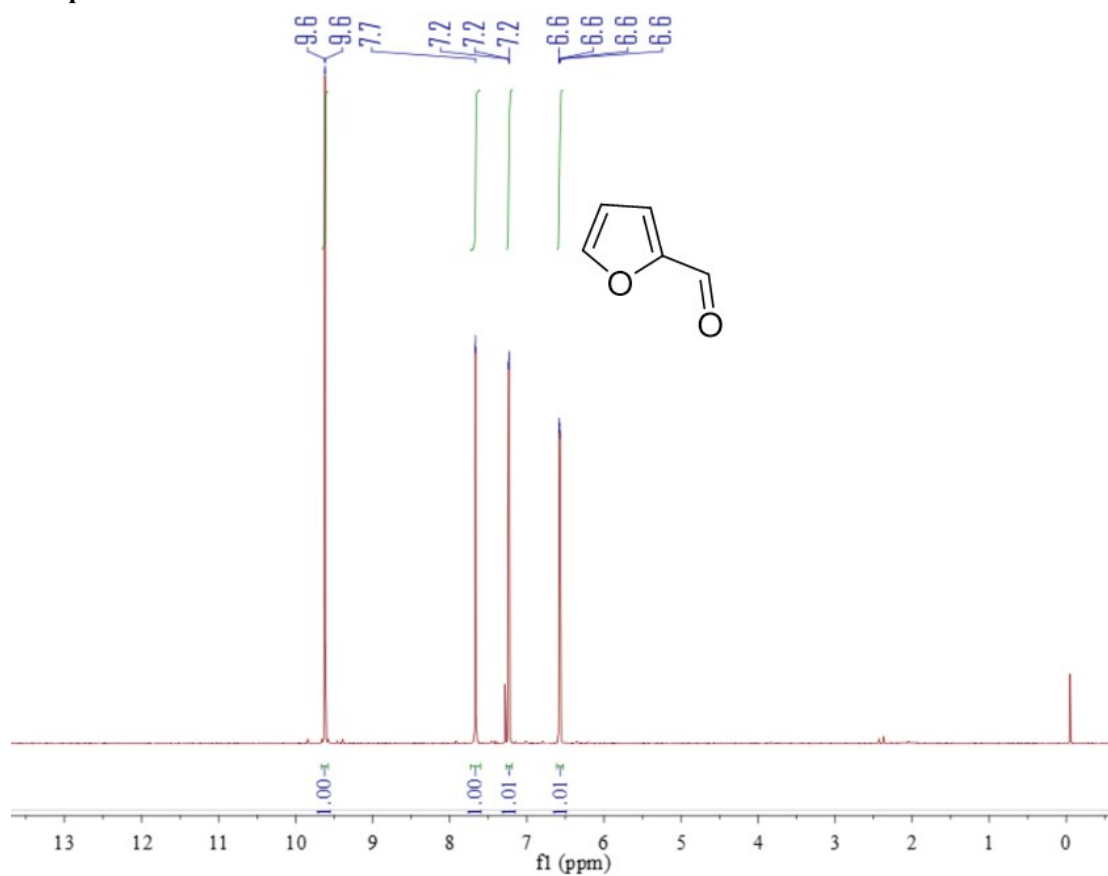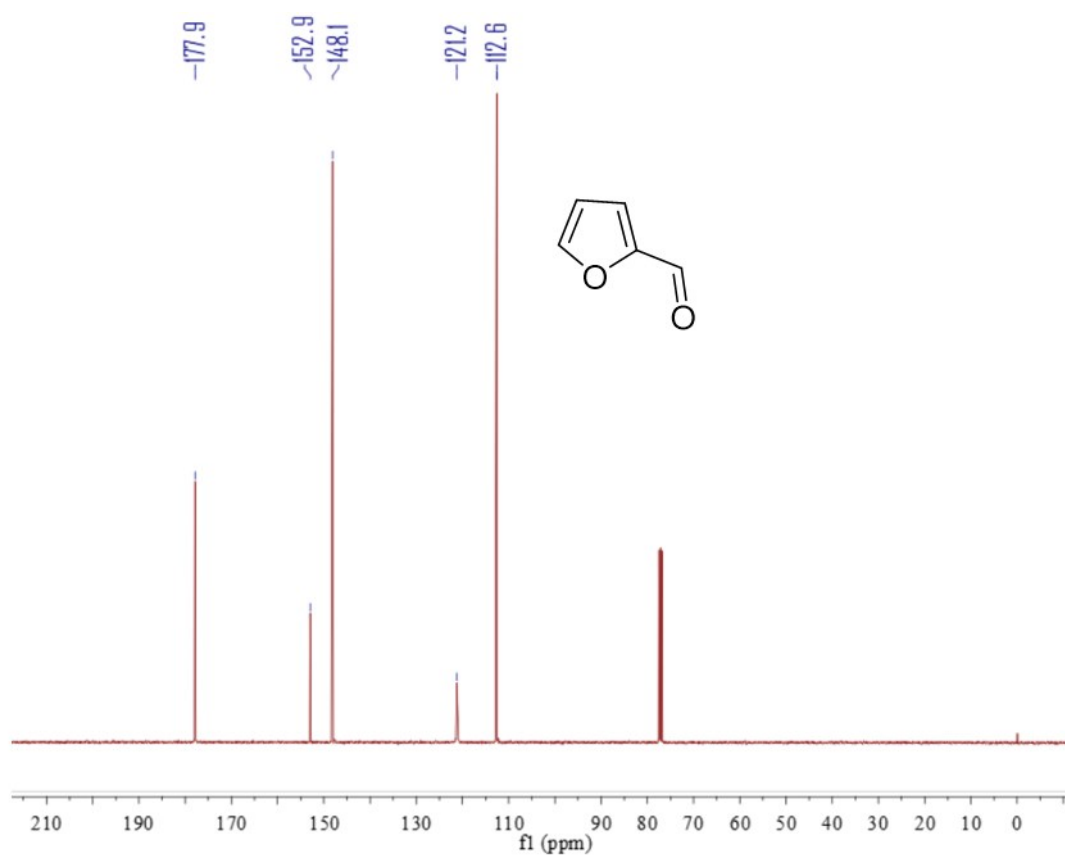

Compound 2p

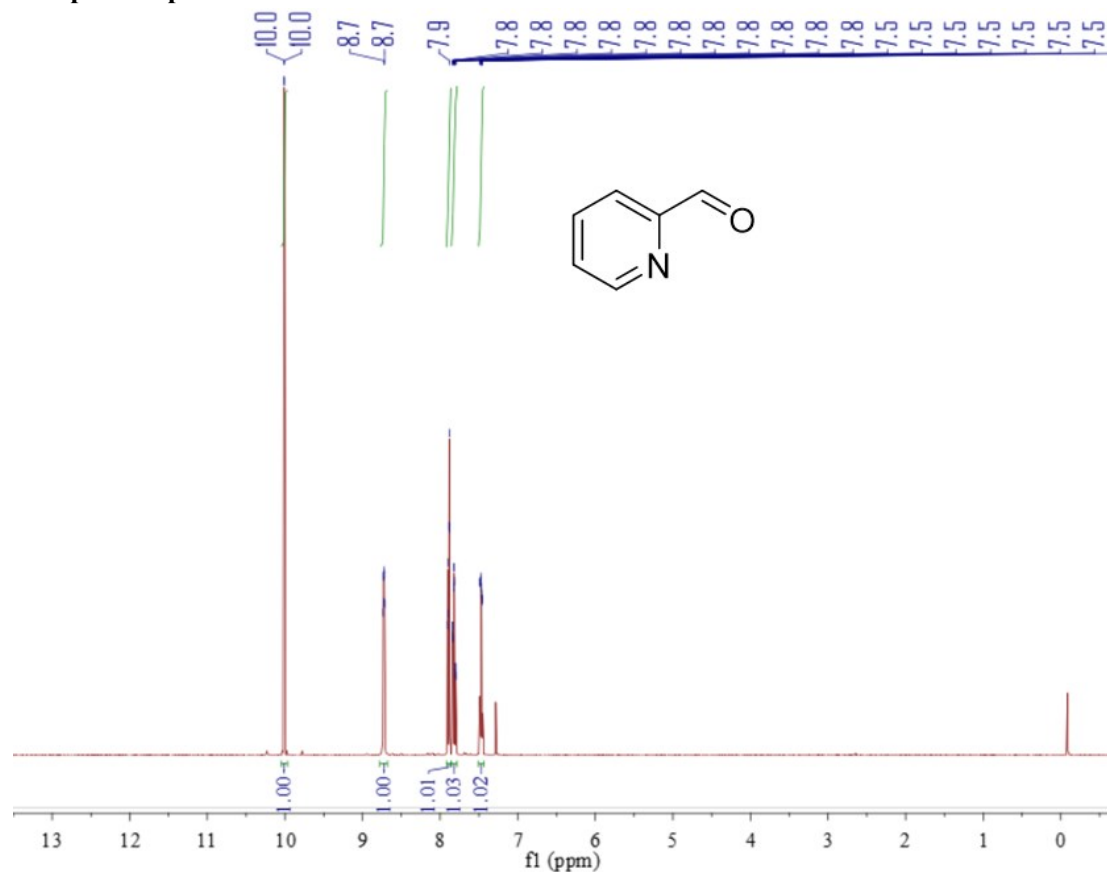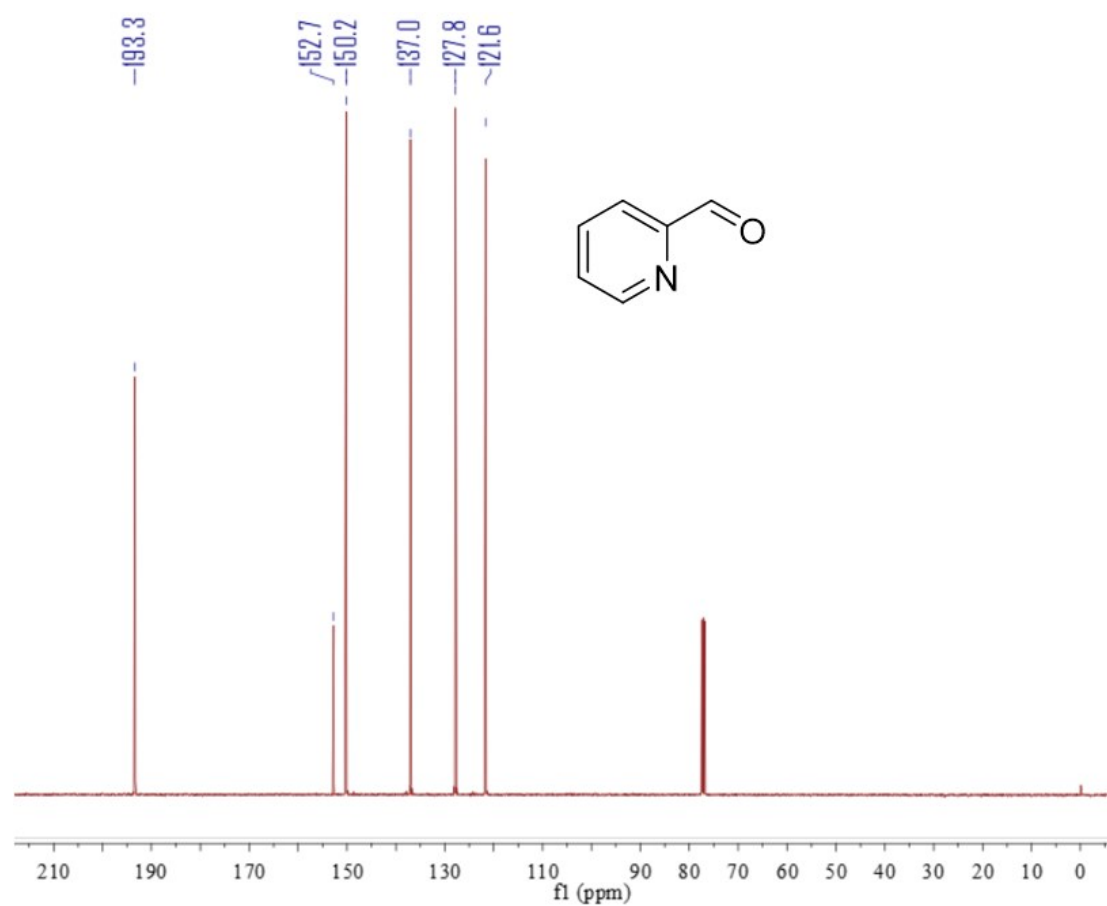

Compound 2q

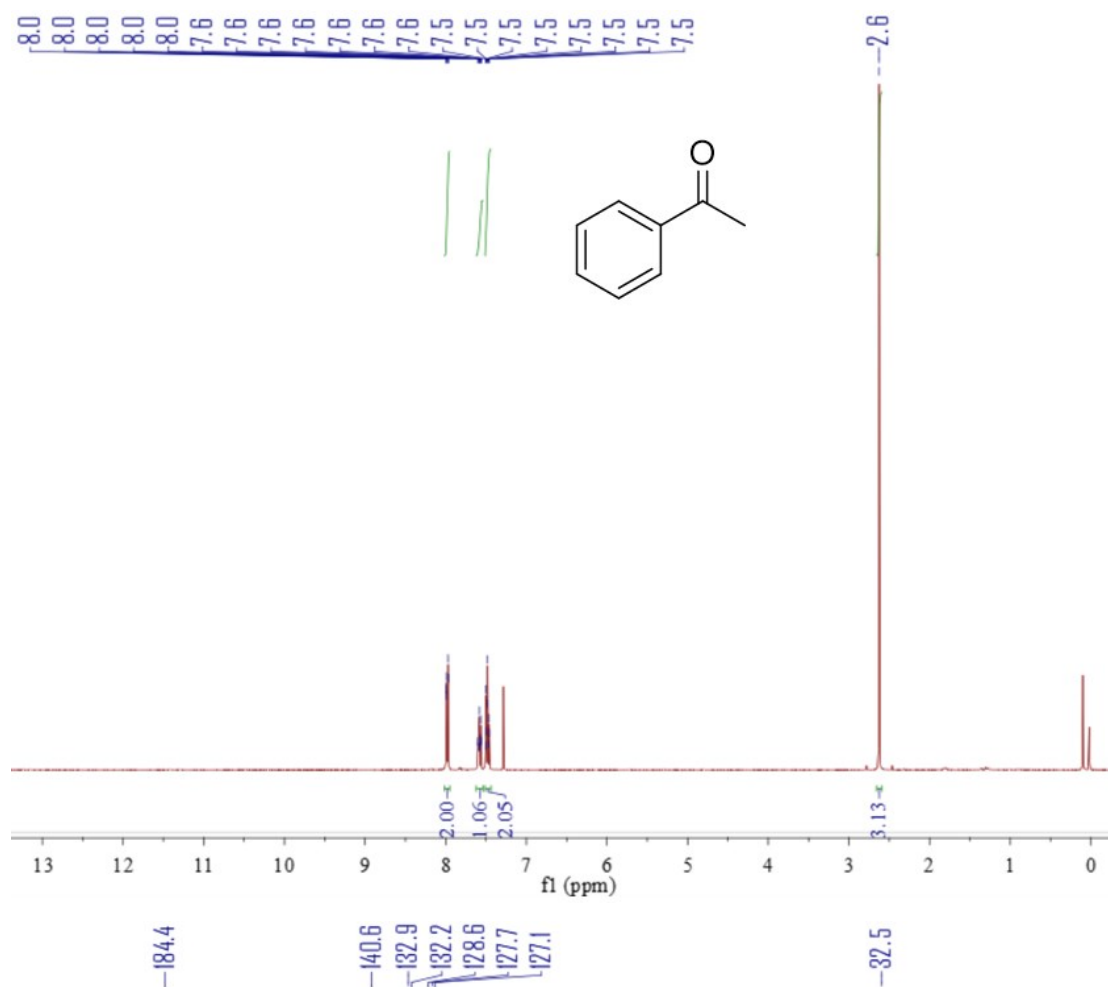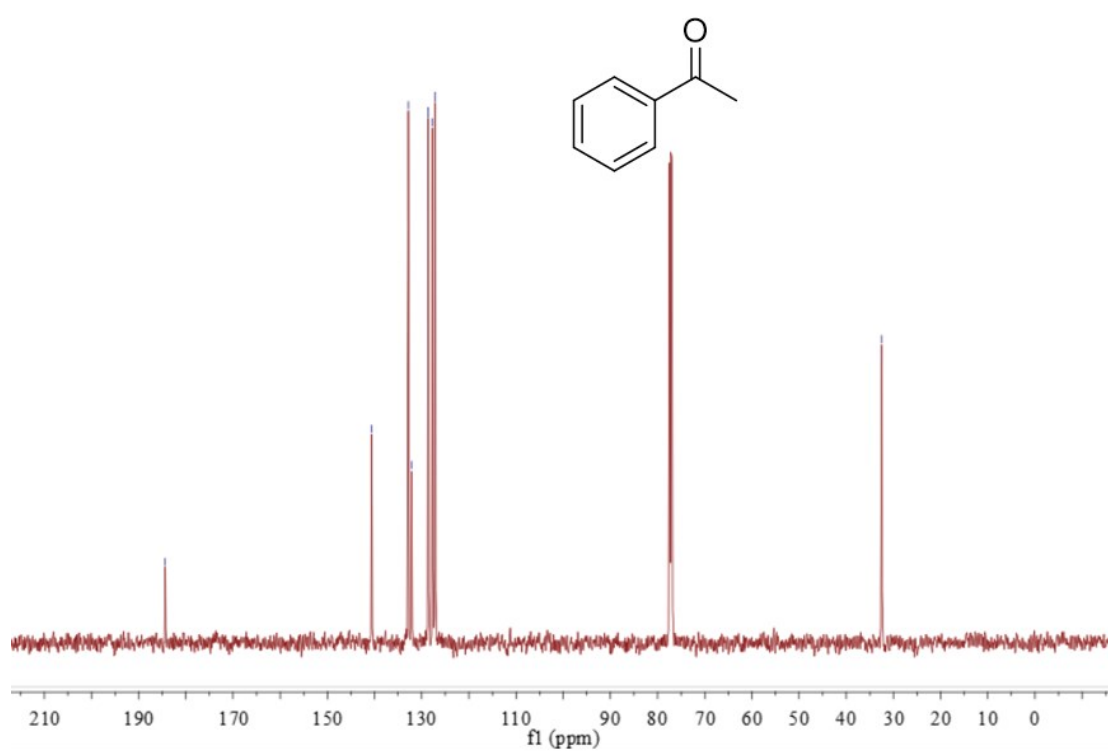

Compound 2r

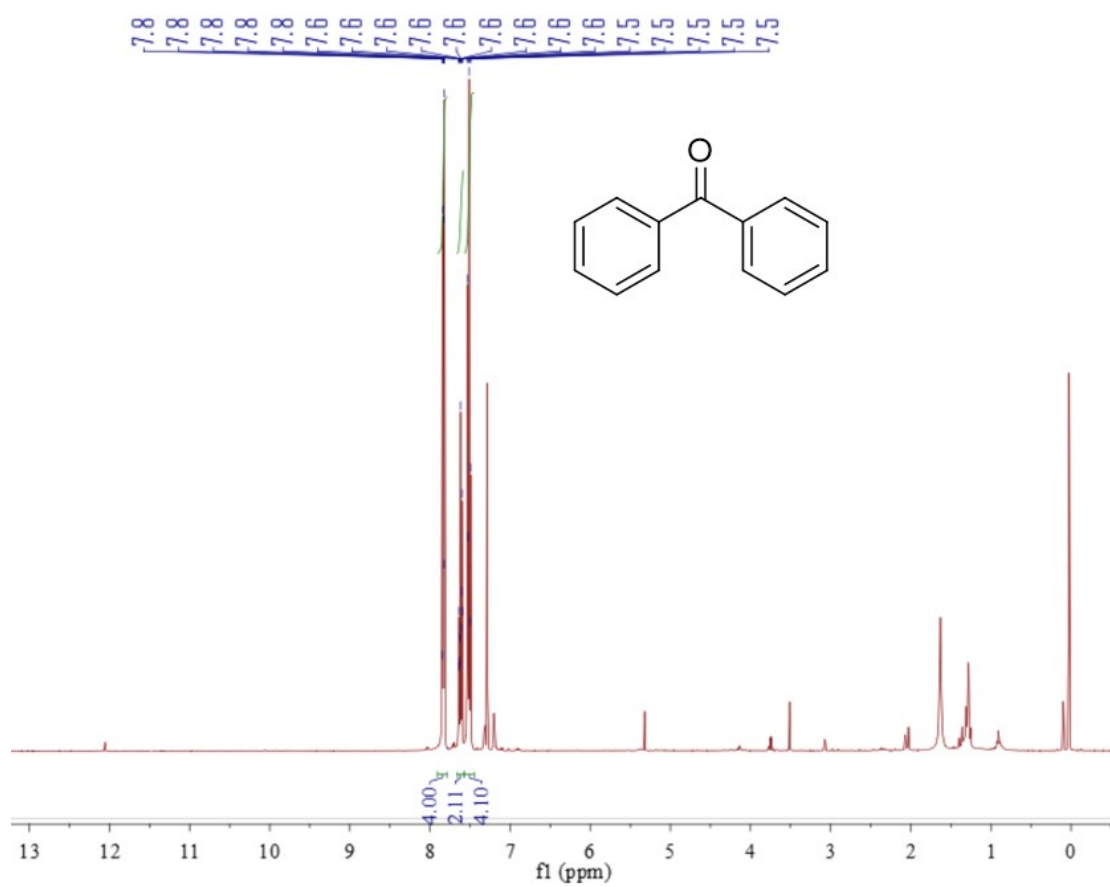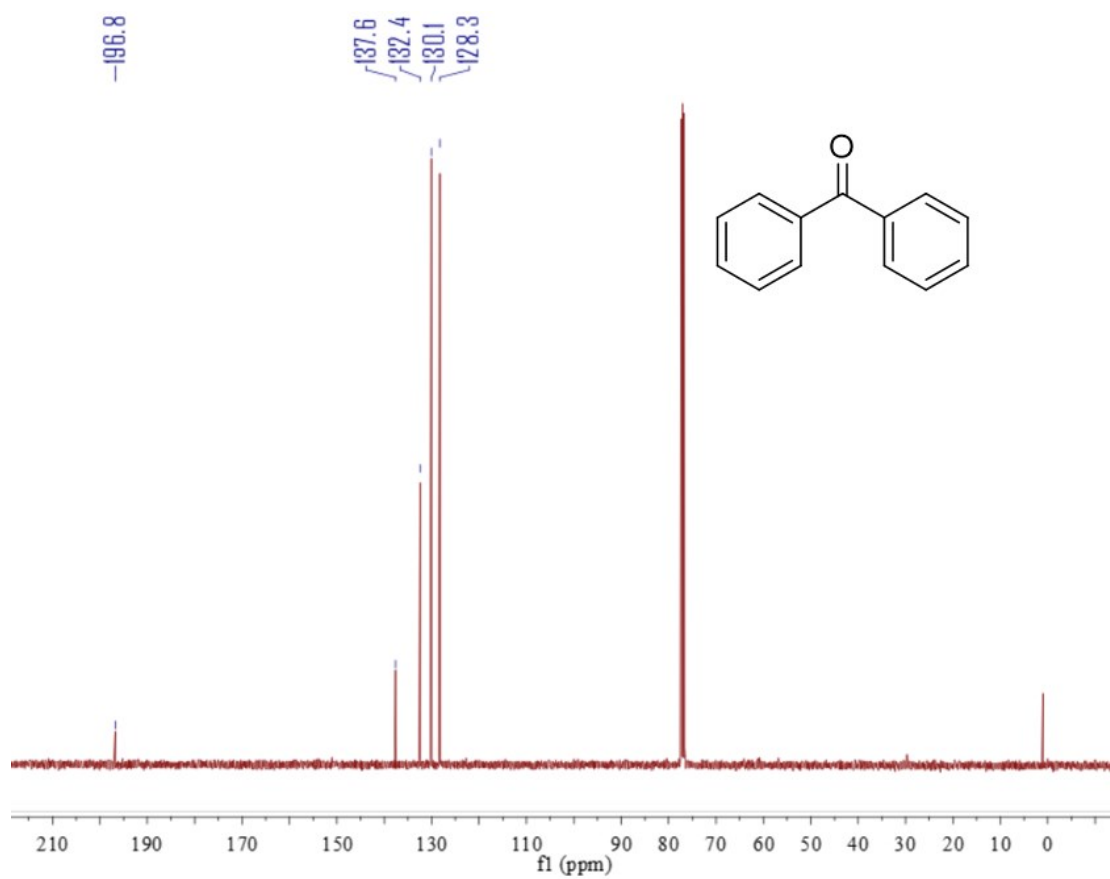

Compound 4a

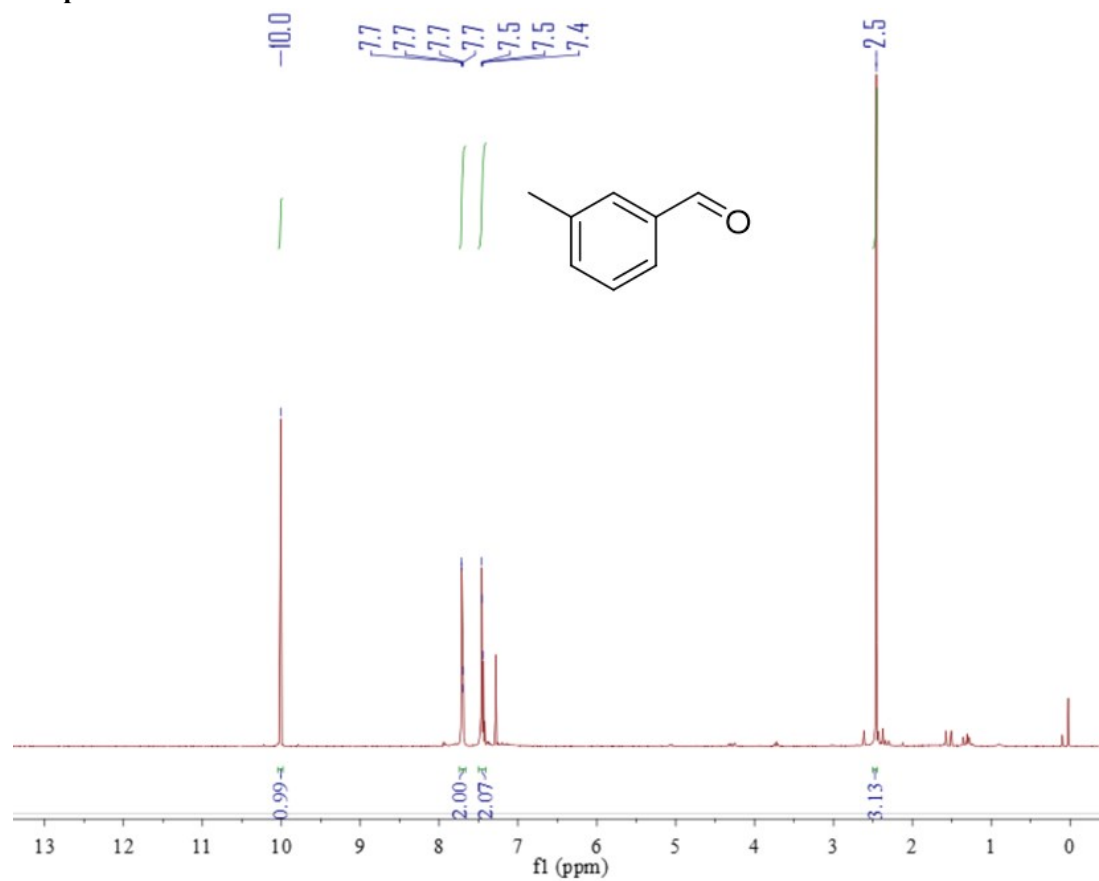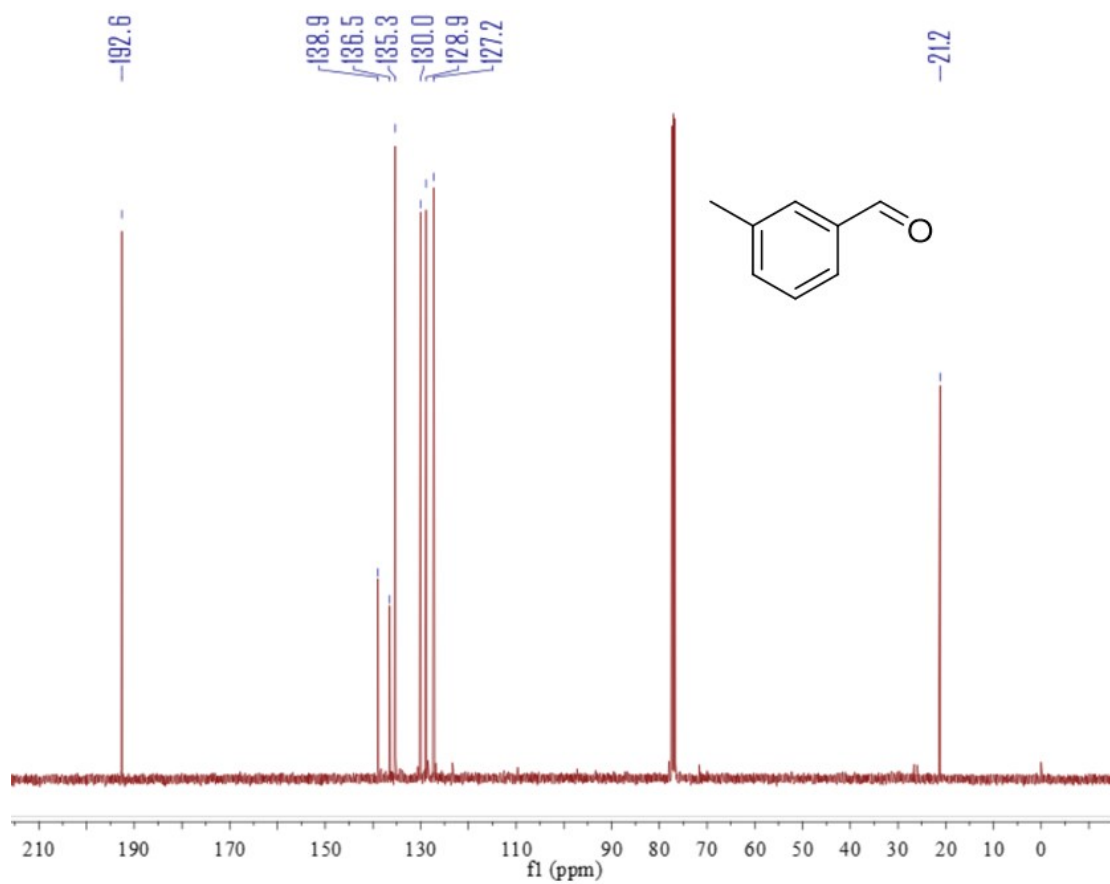

Compound 4b

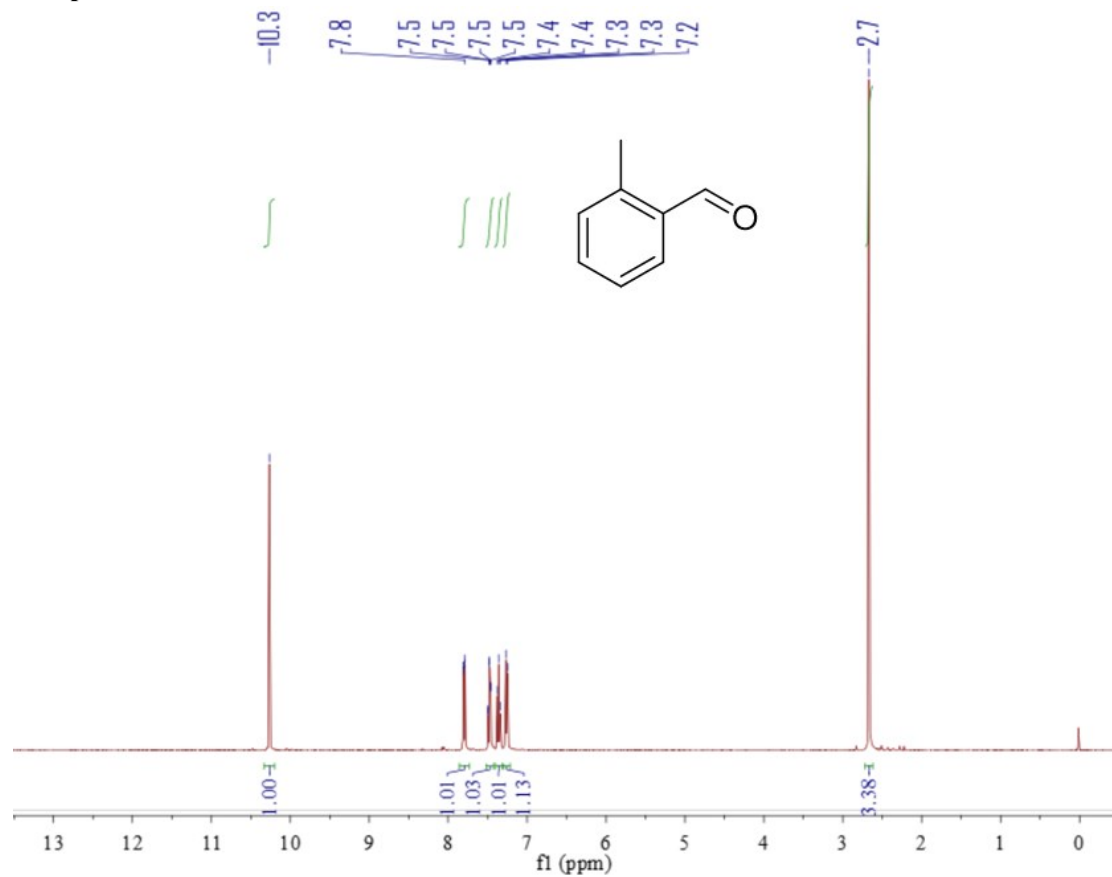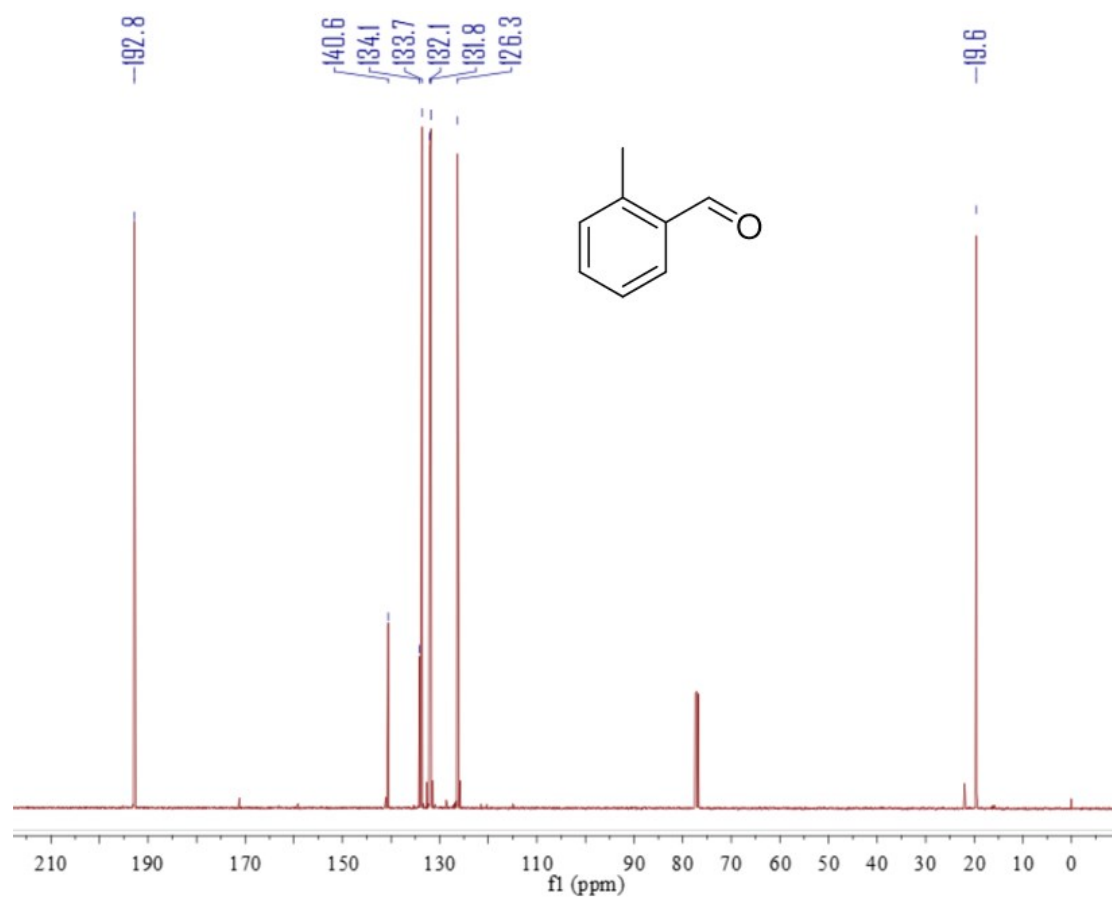

Compound 4c

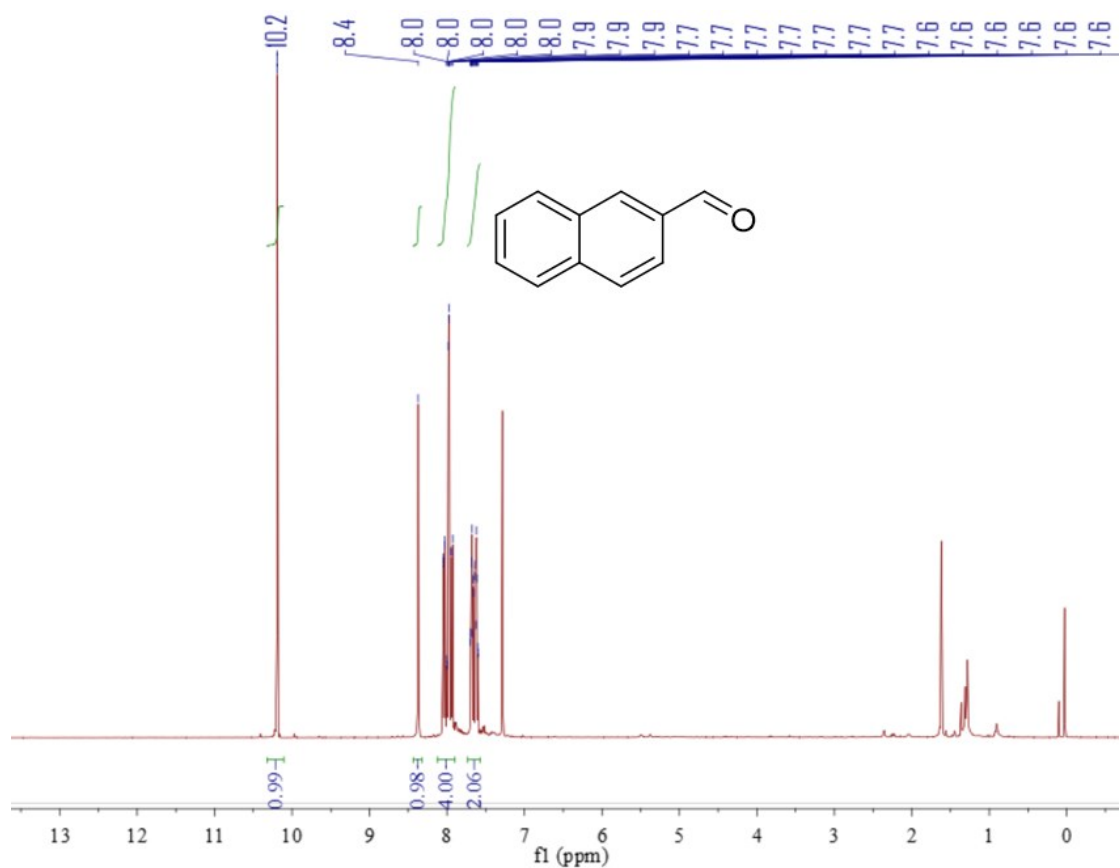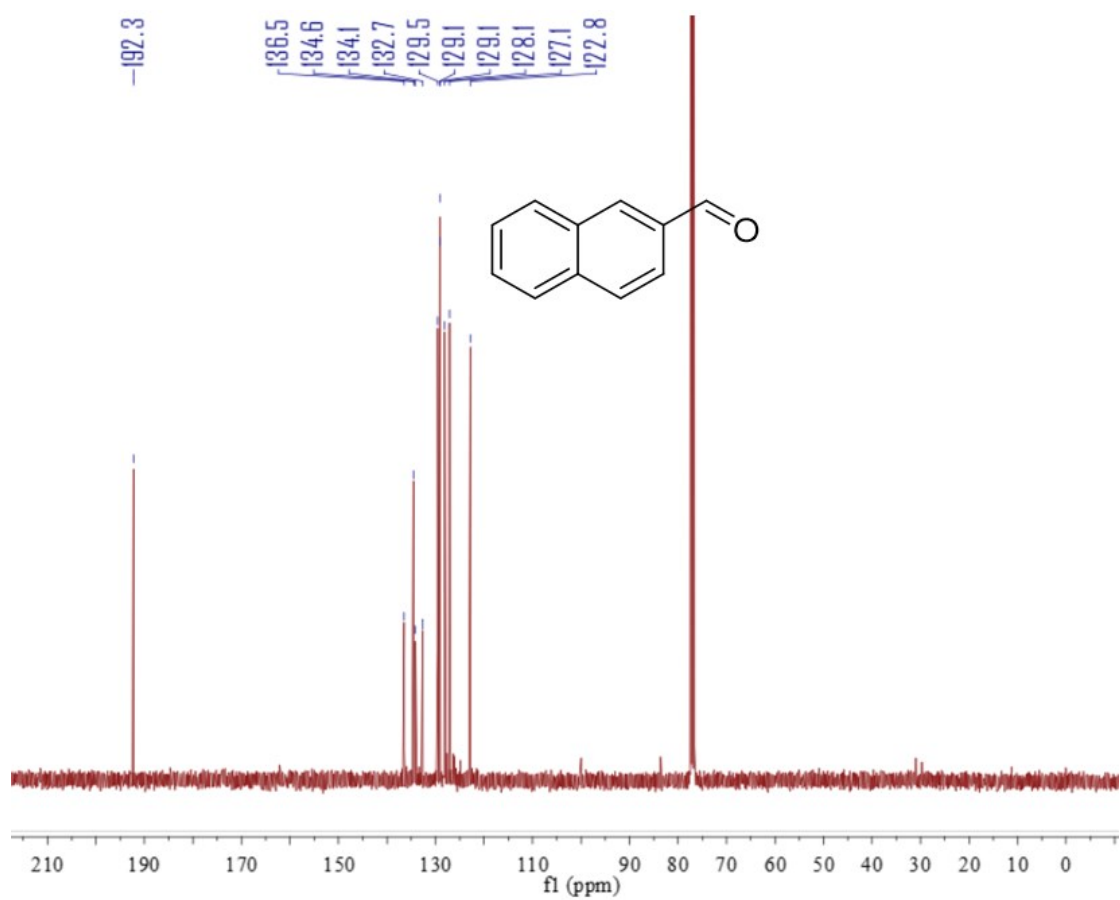

Compound 4d

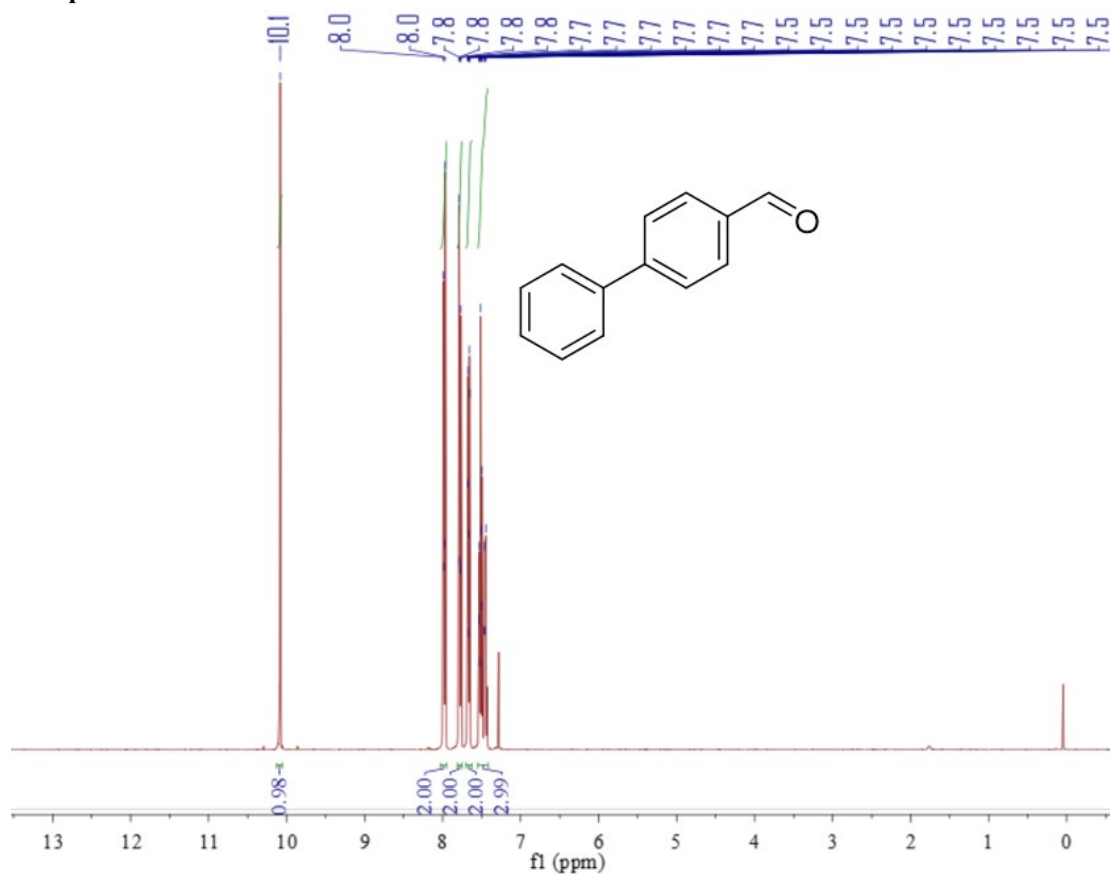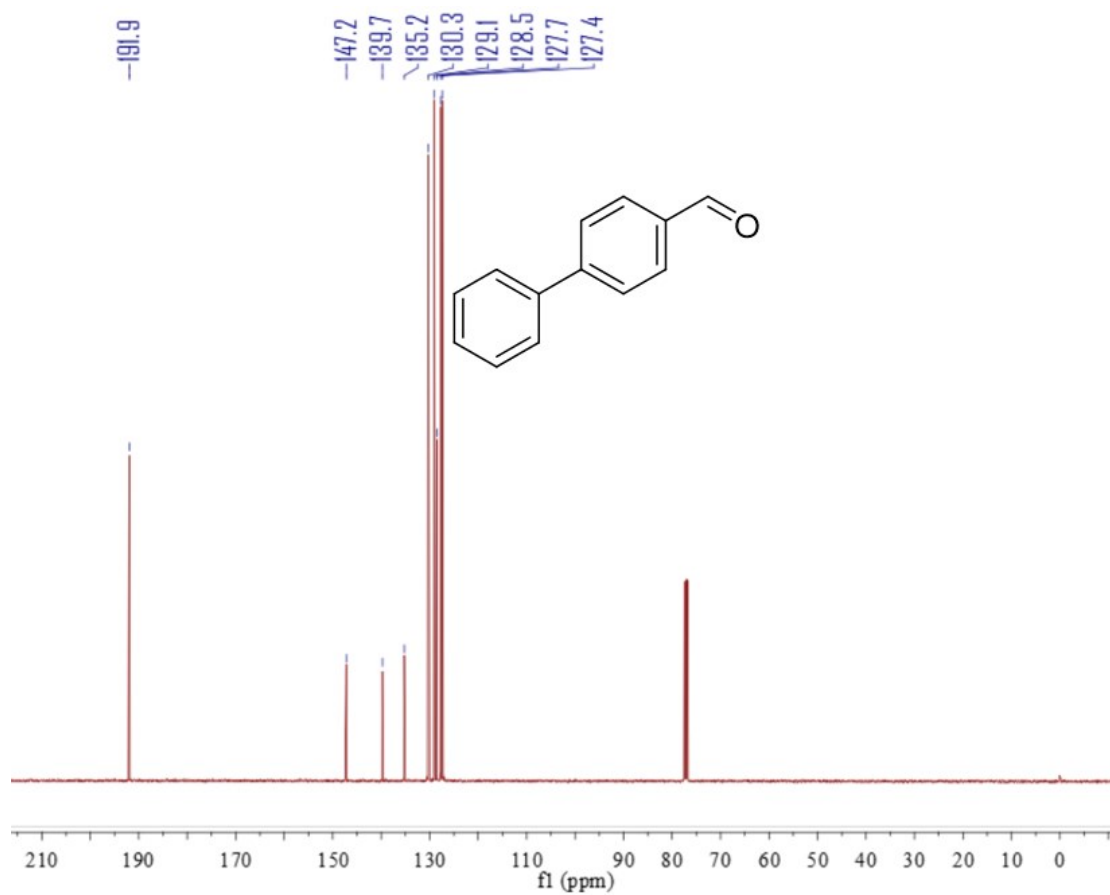



Compound 4e

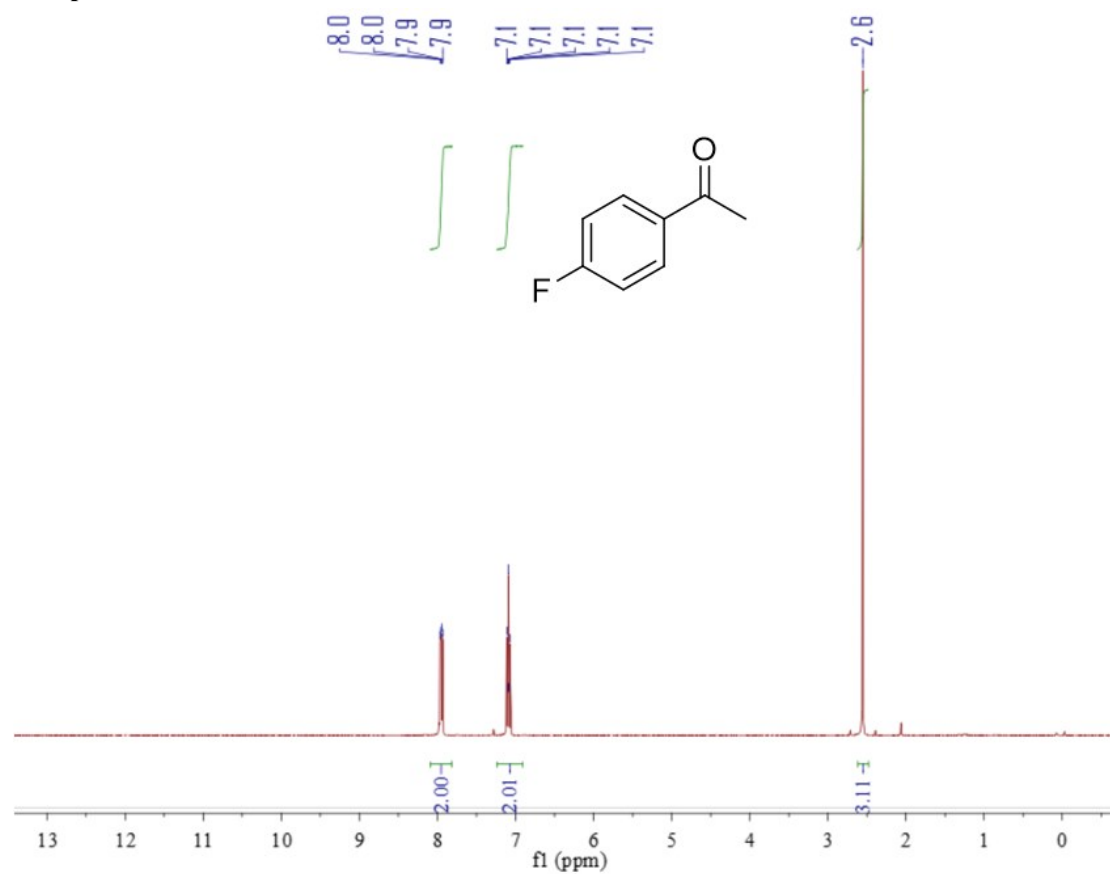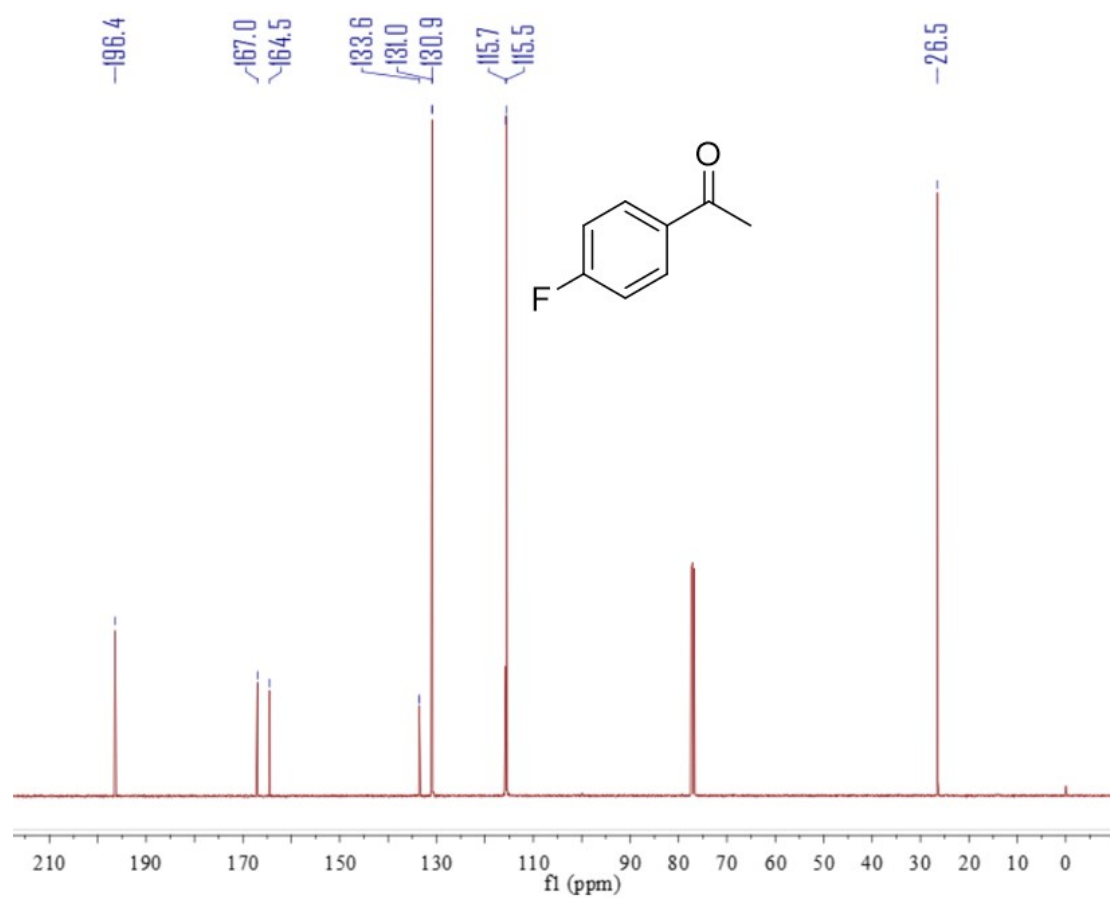

Compound 4f

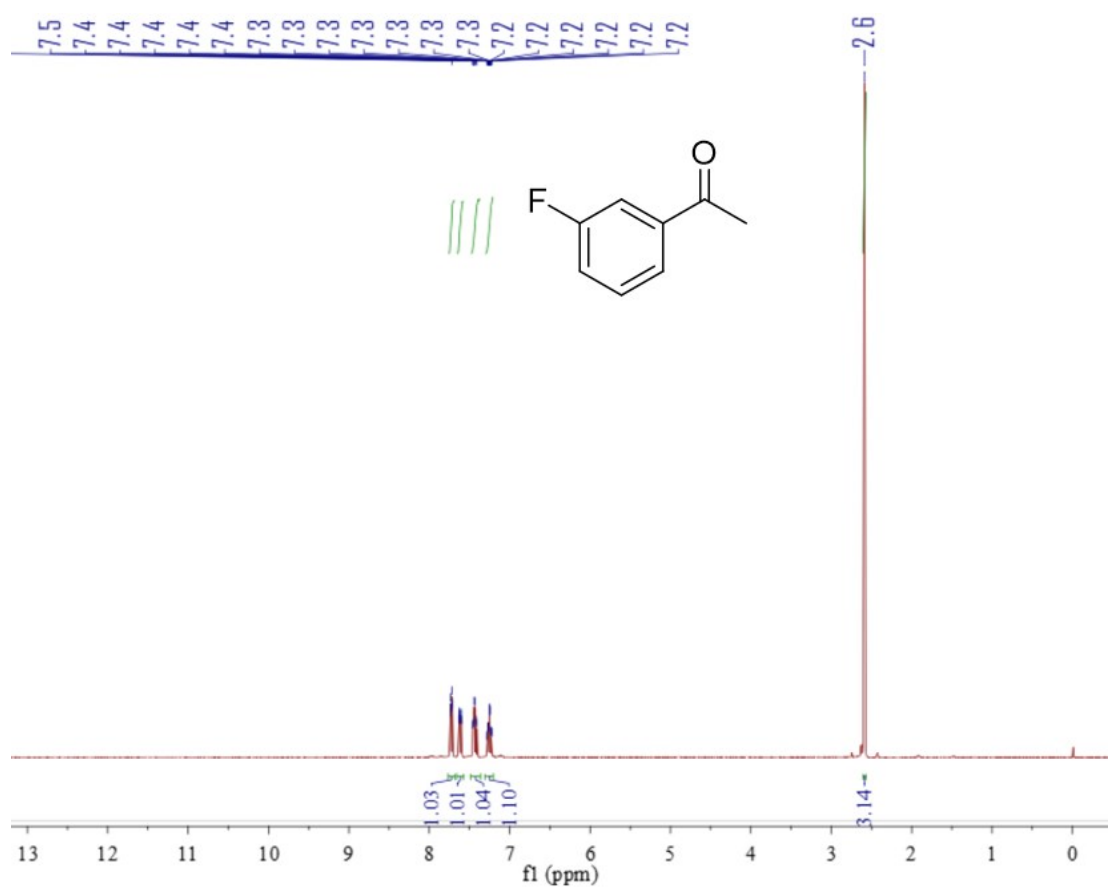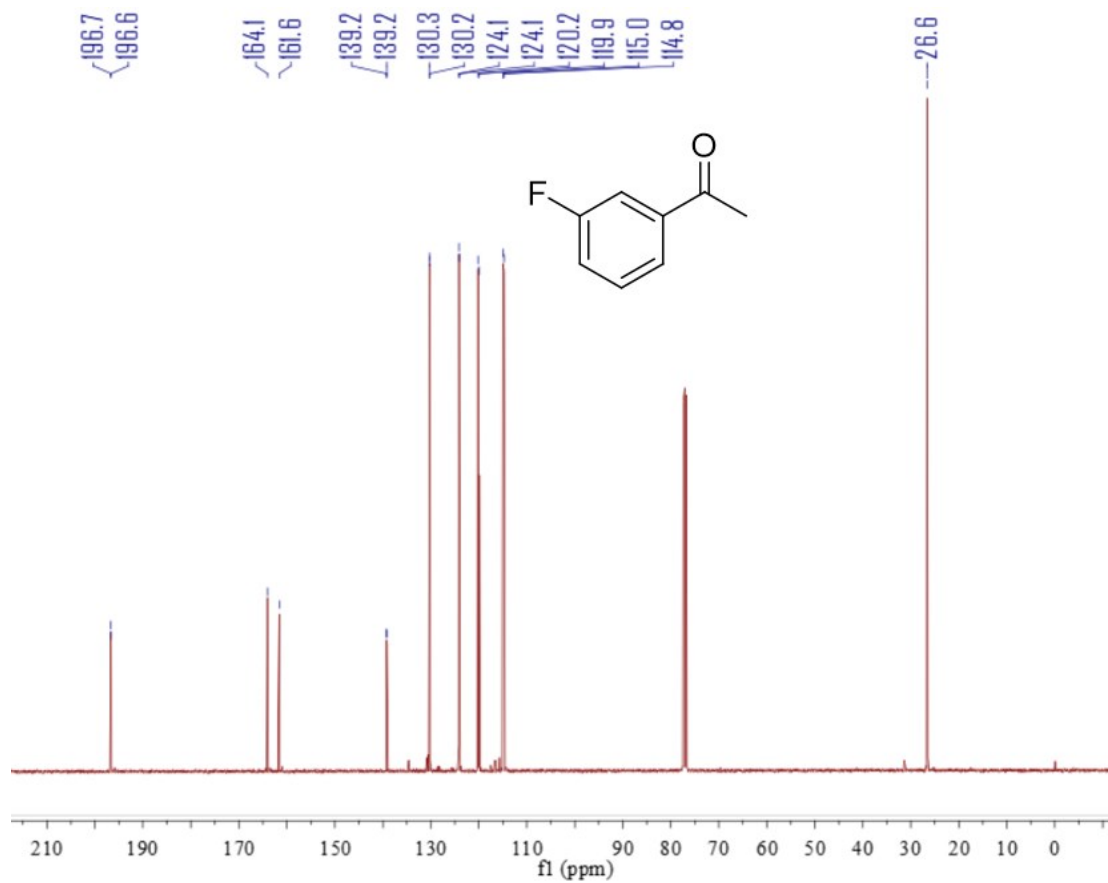

Compound 4g

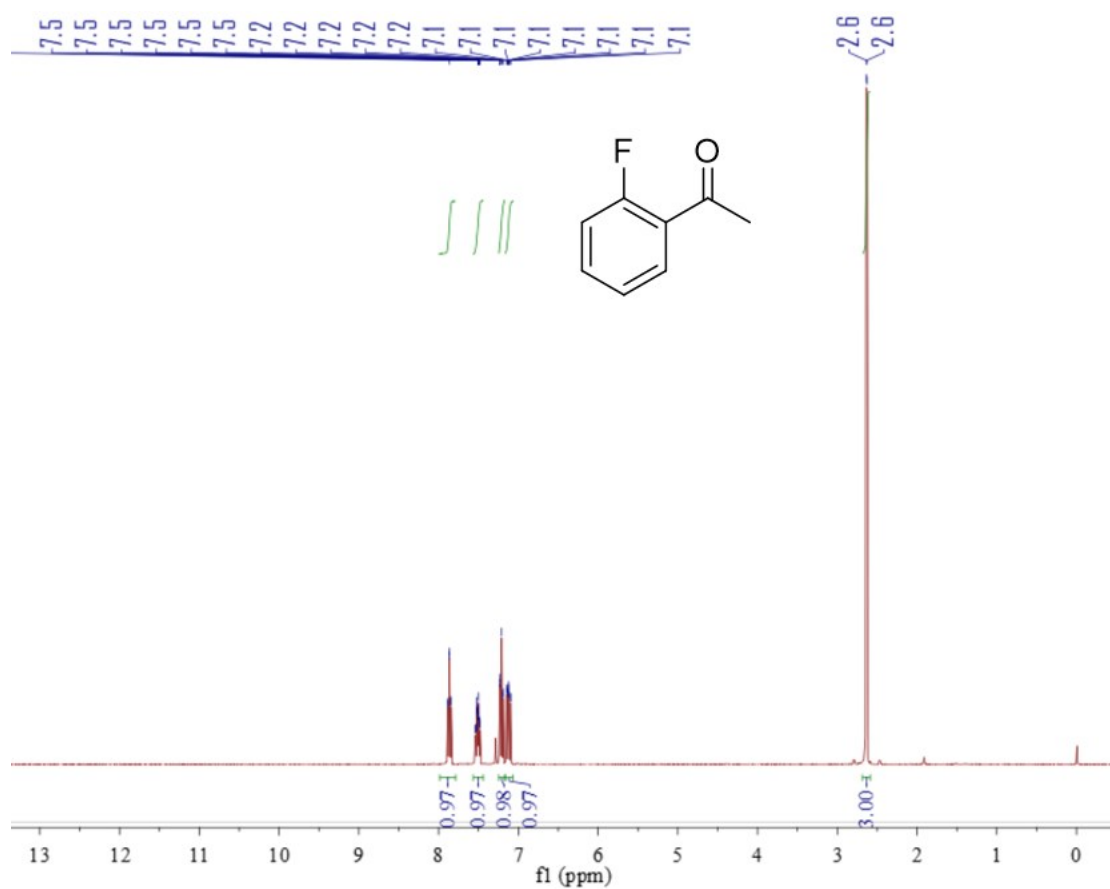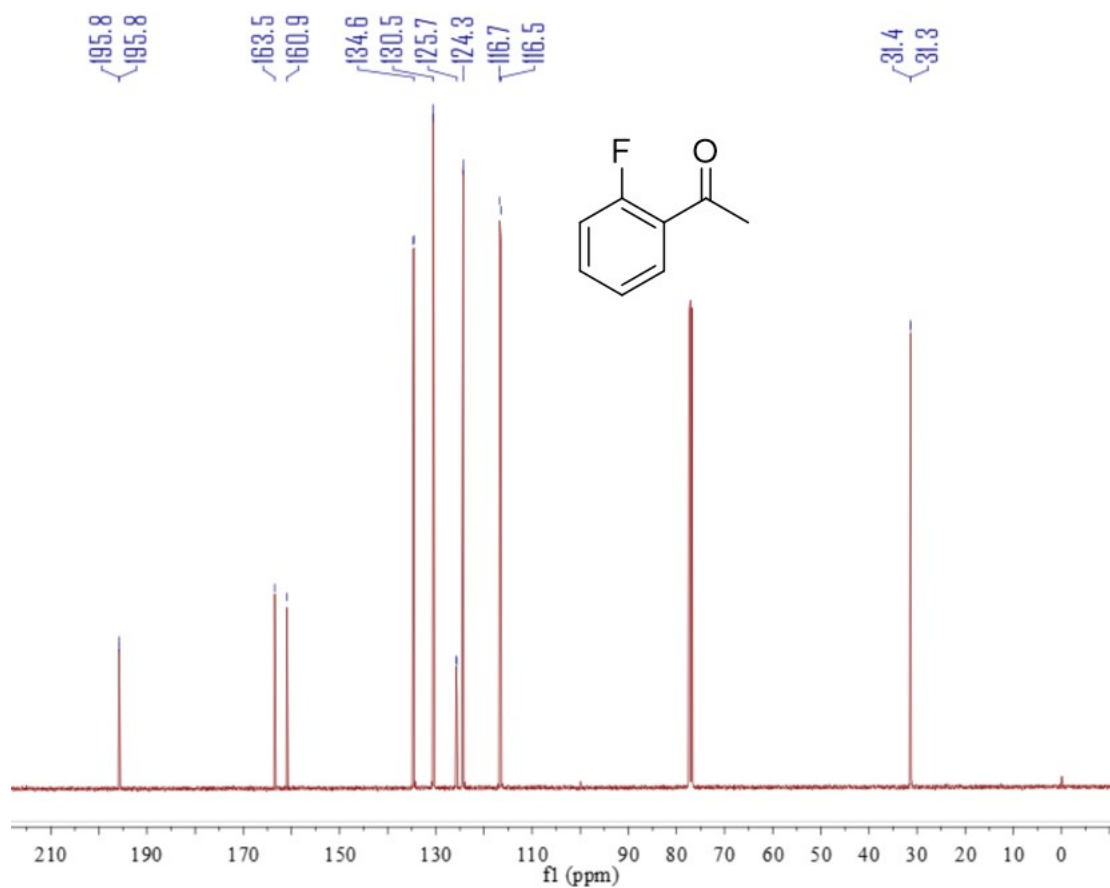

Compound 4h

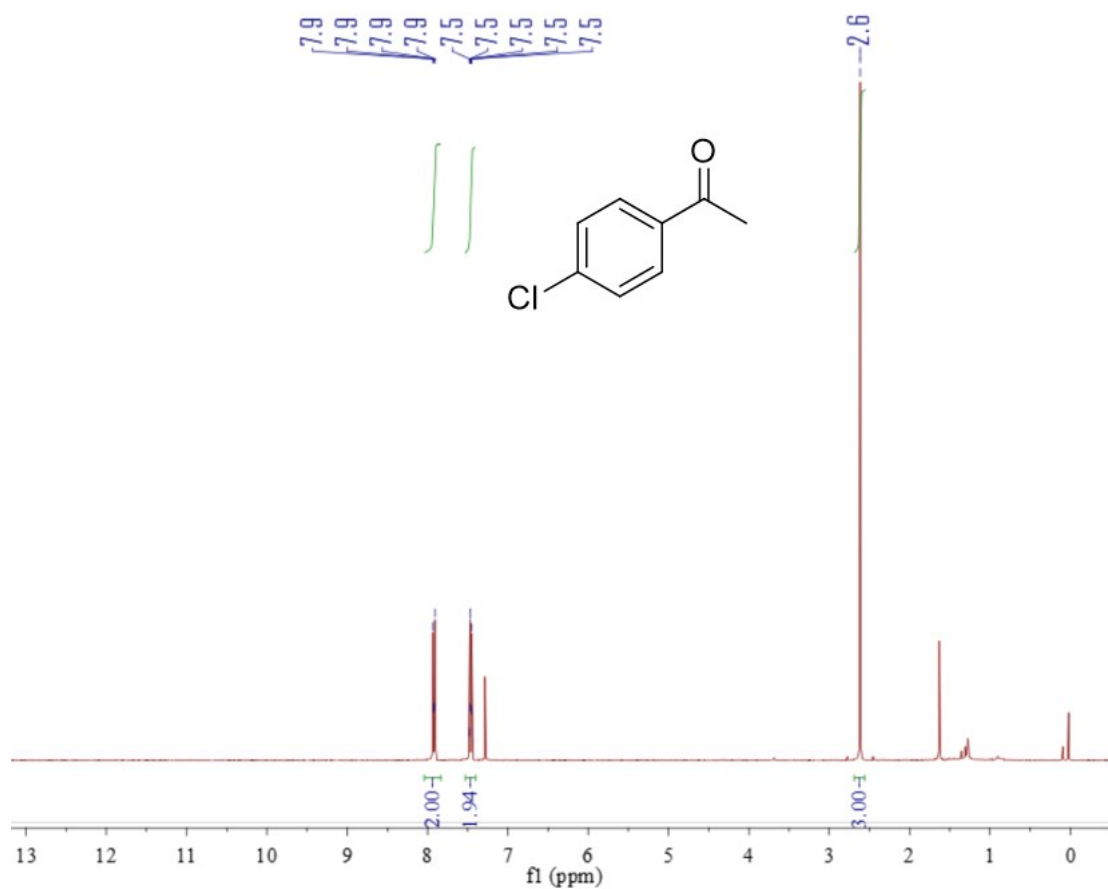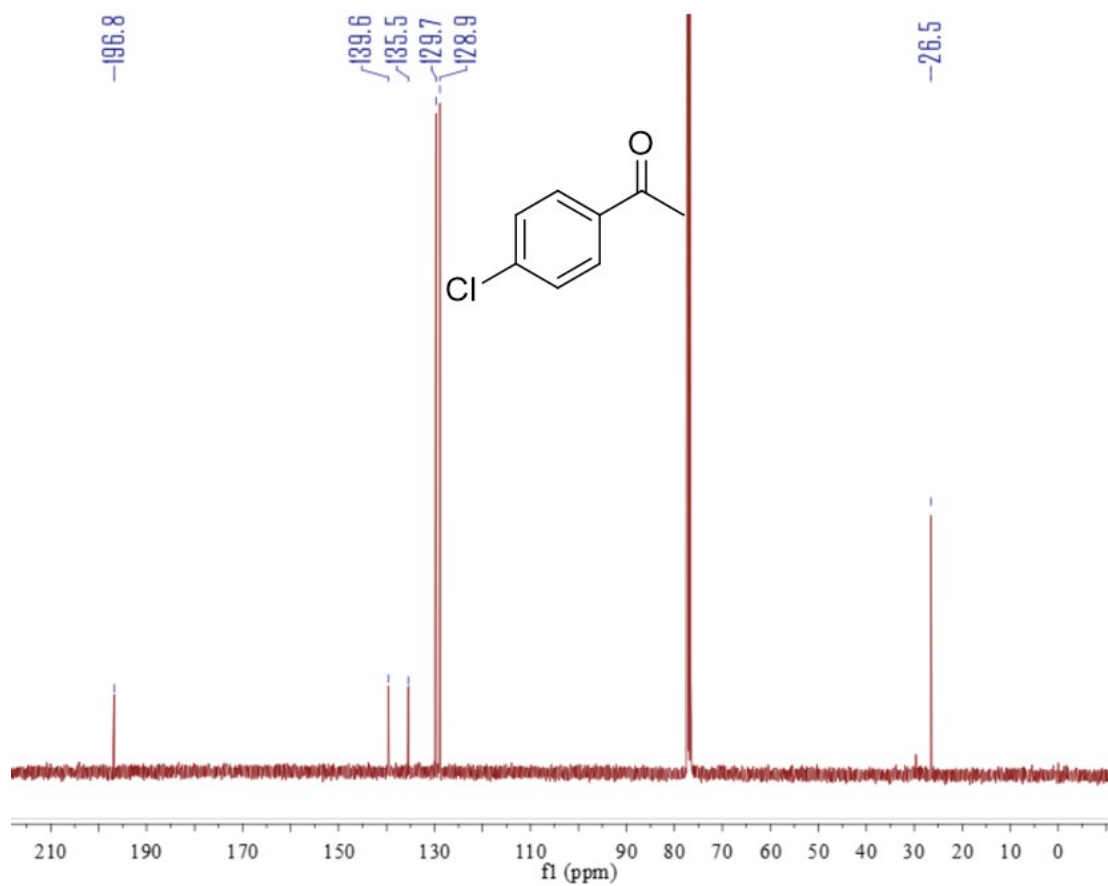

**Compound 4i**

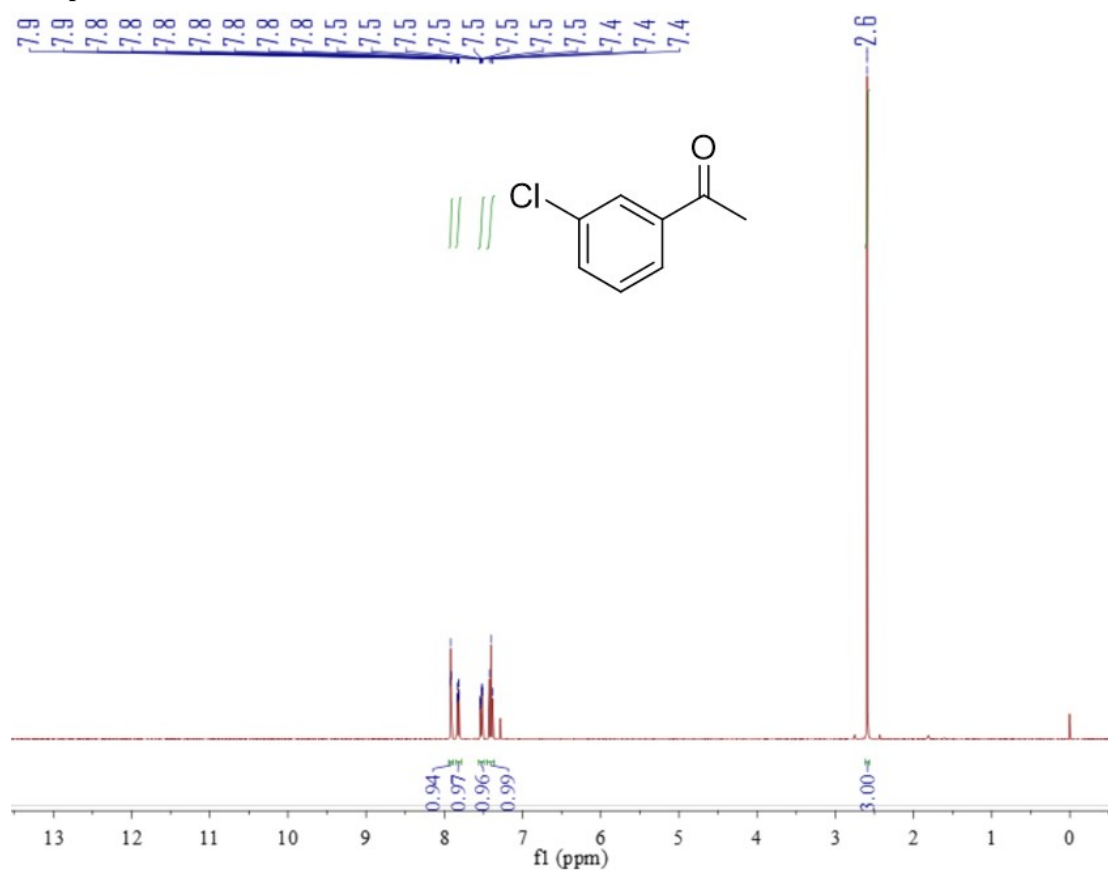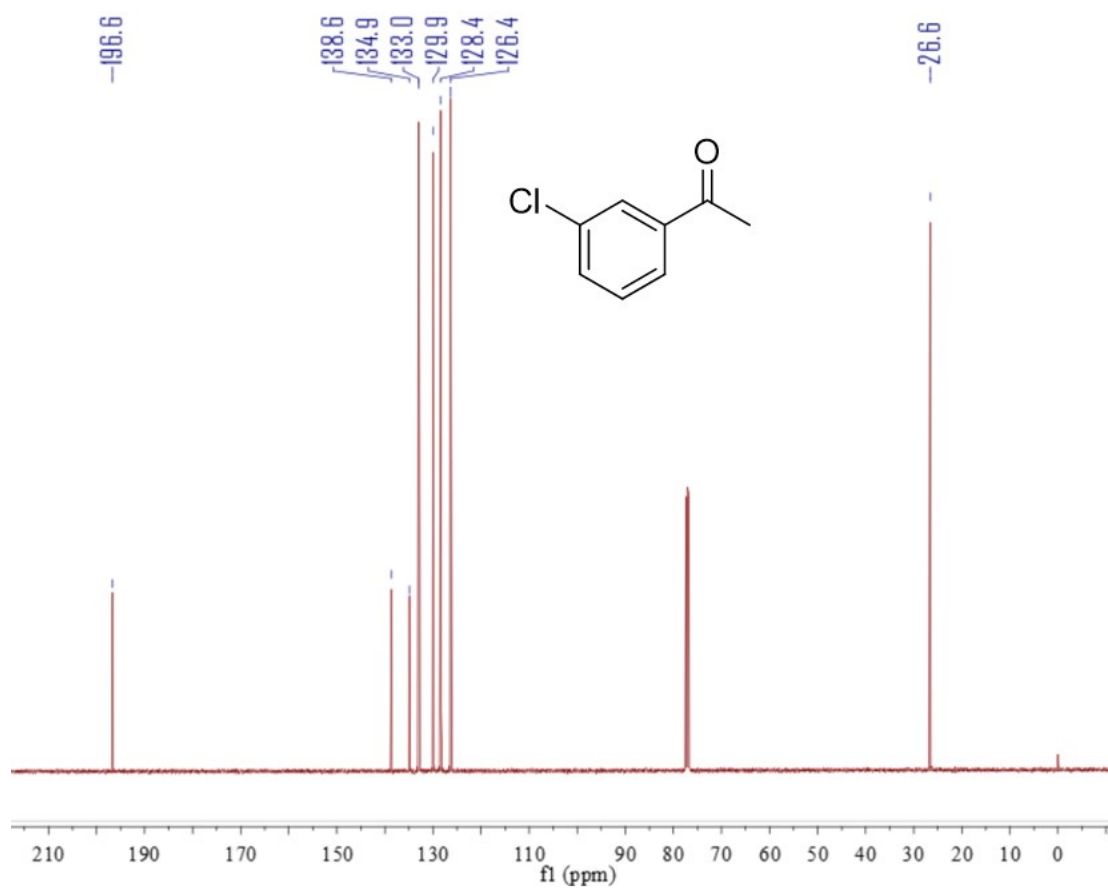

Compound 4j

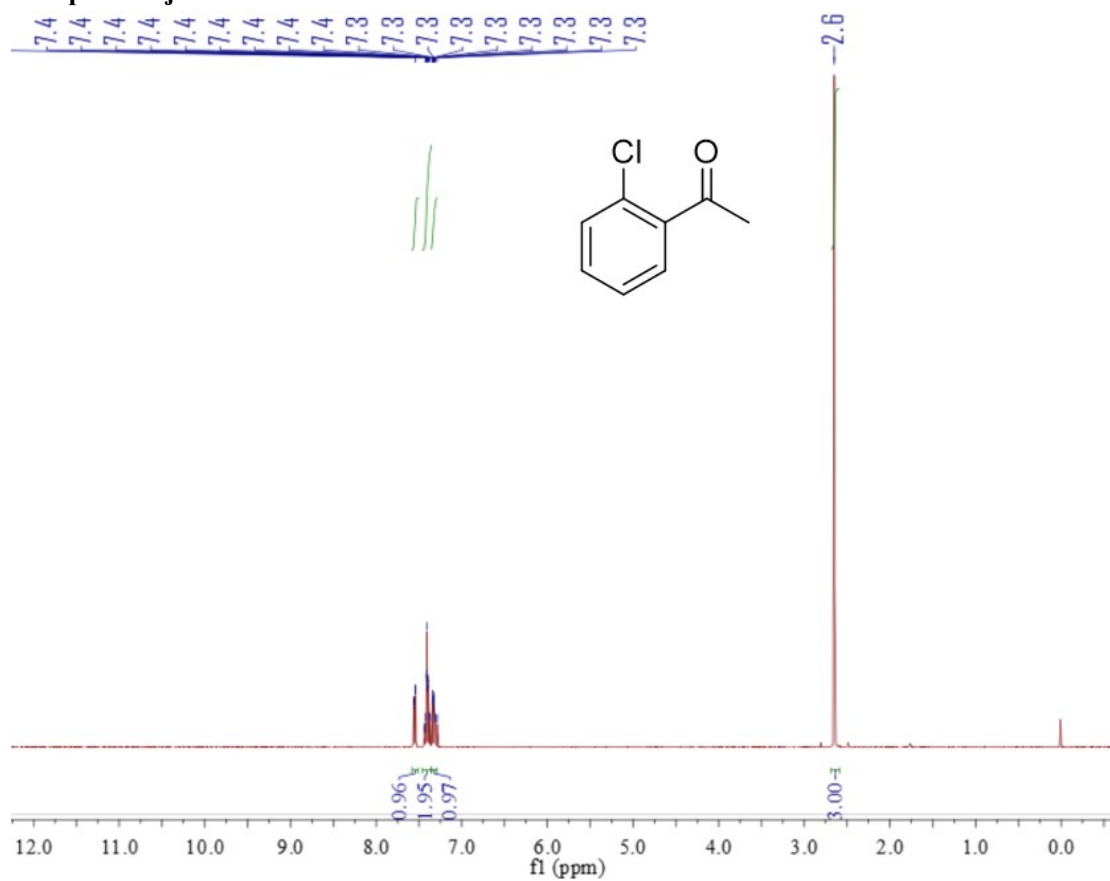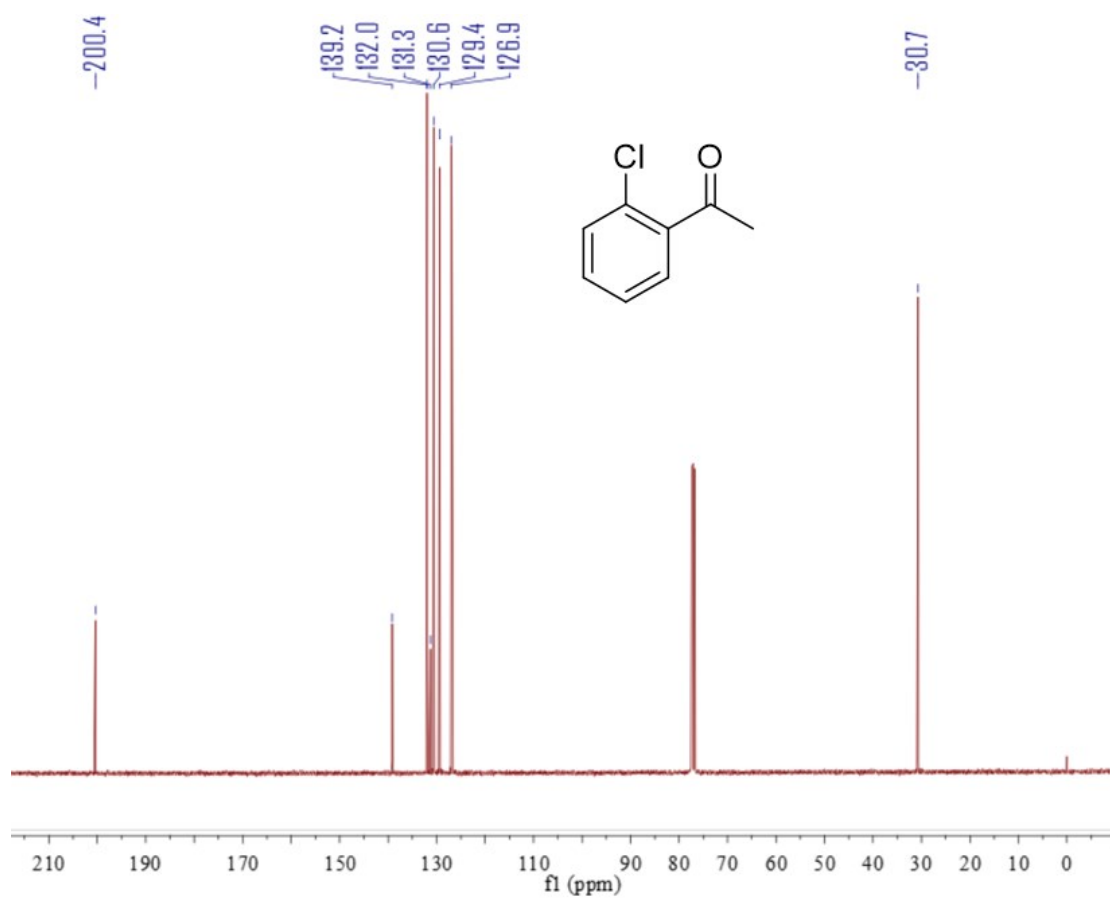

Compound 4k

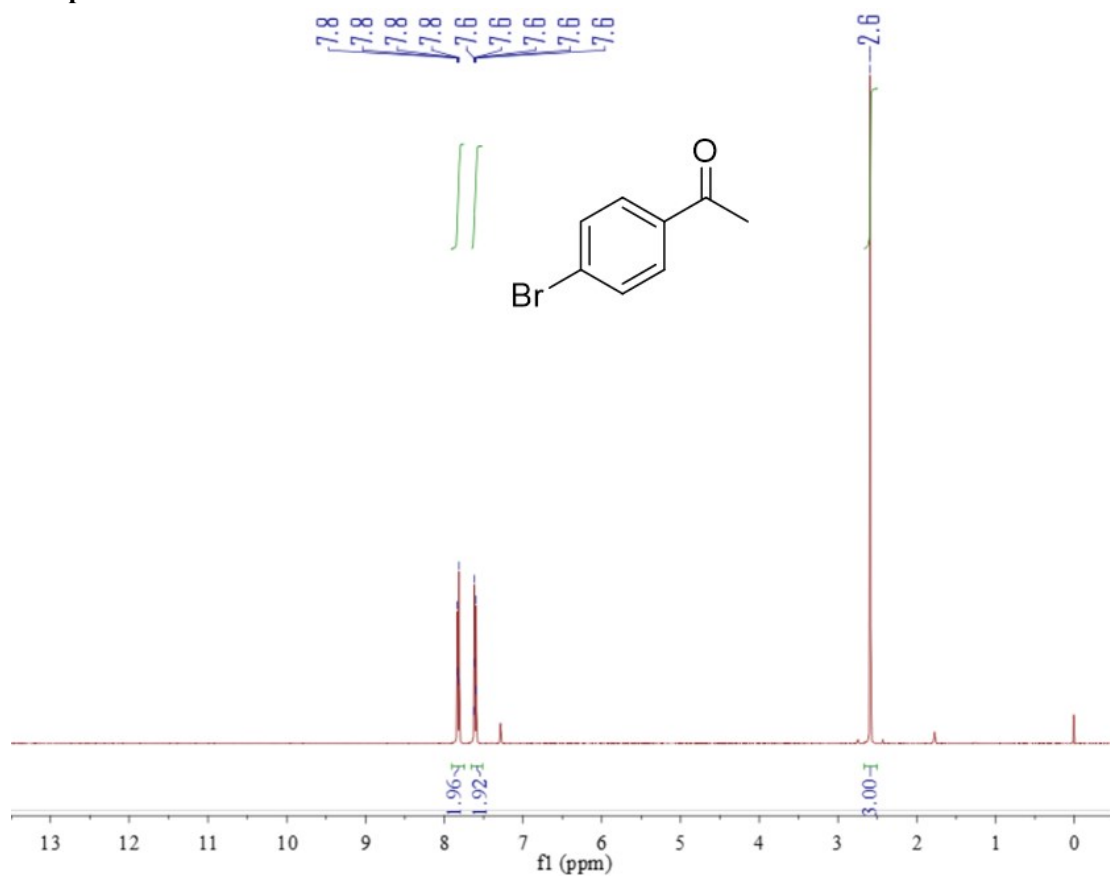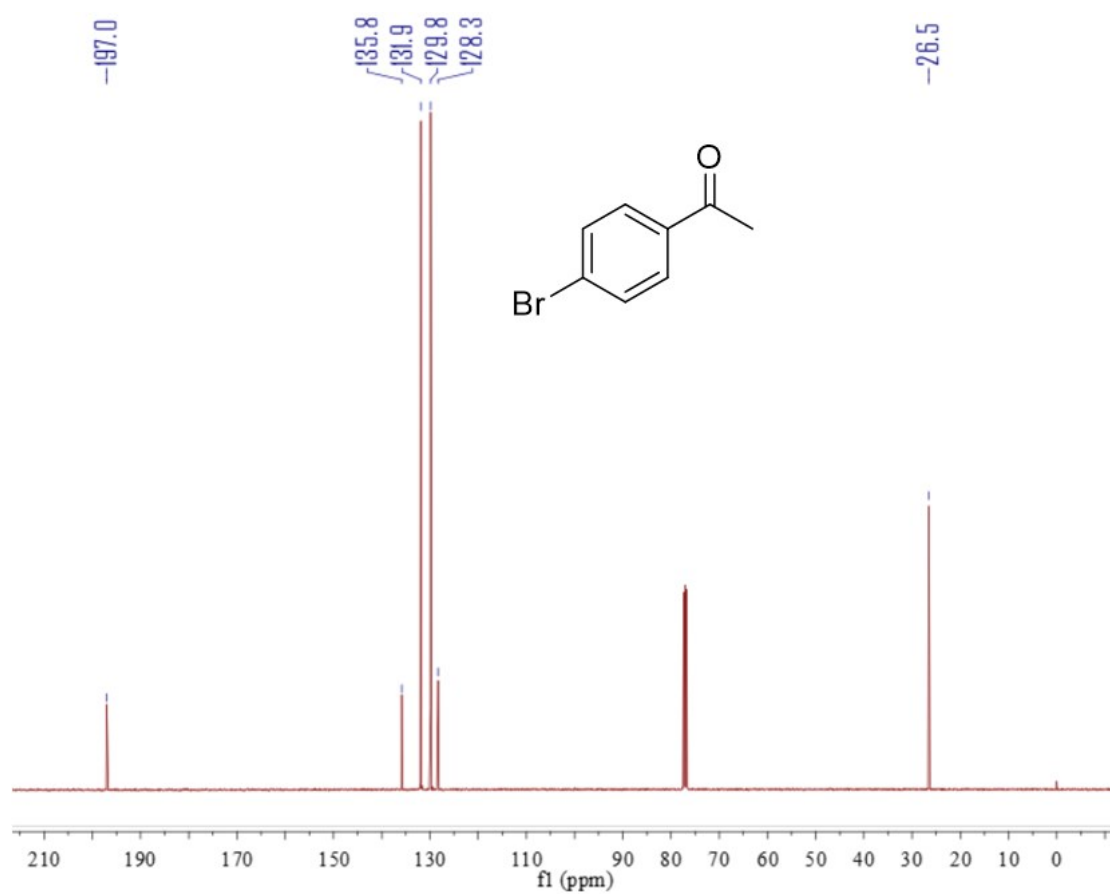

Compound 4l

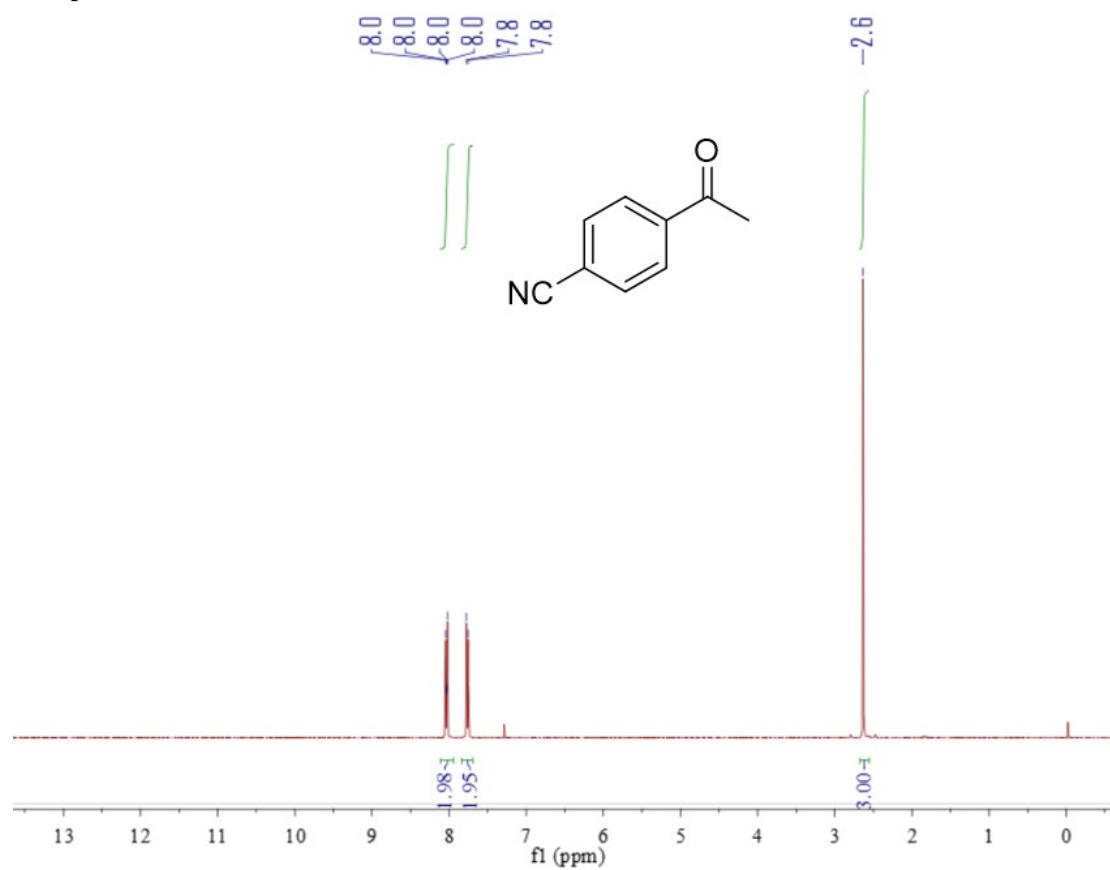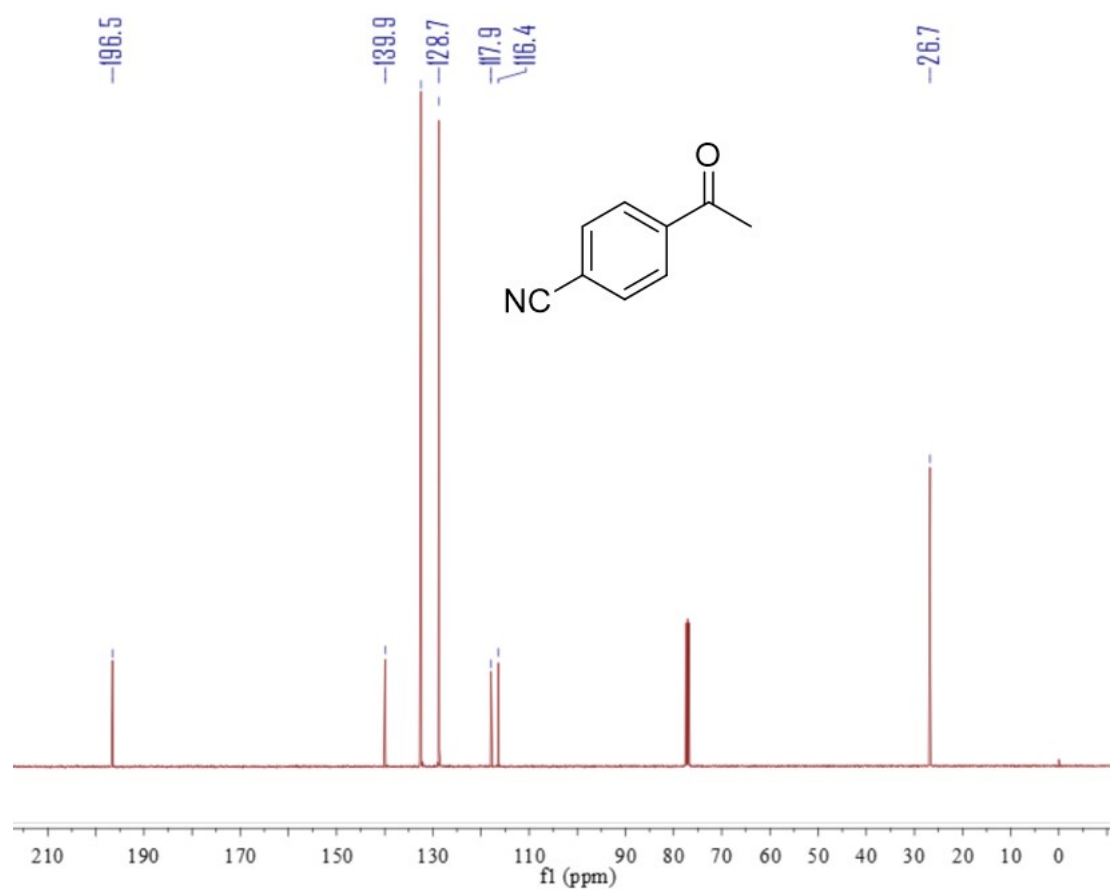



Compound 4m

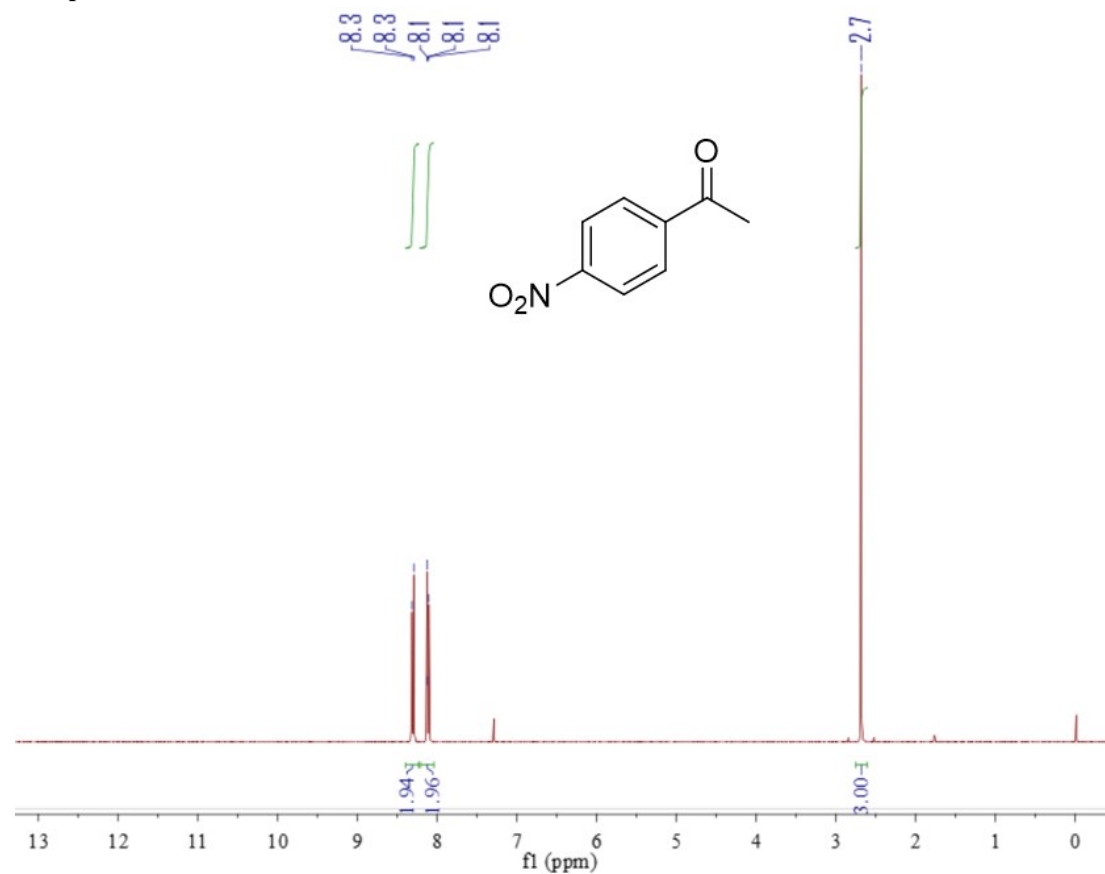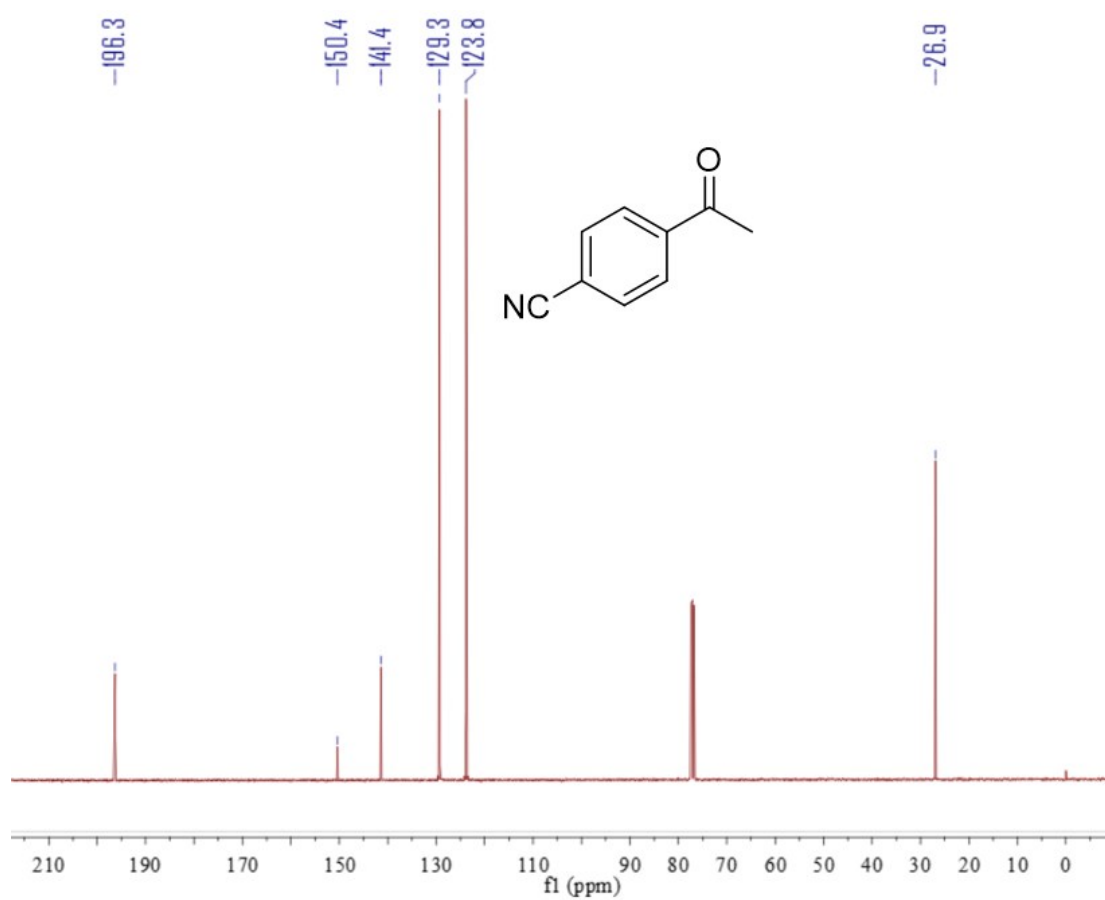

Compound 4n

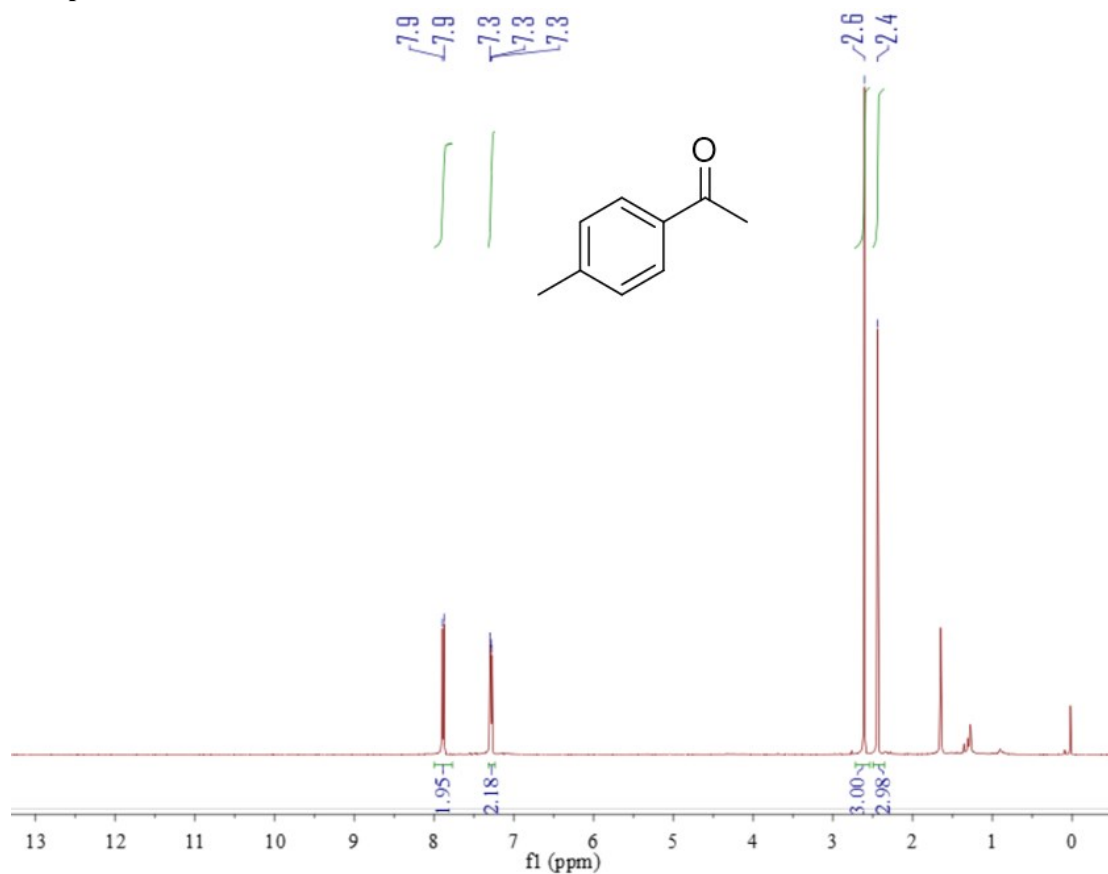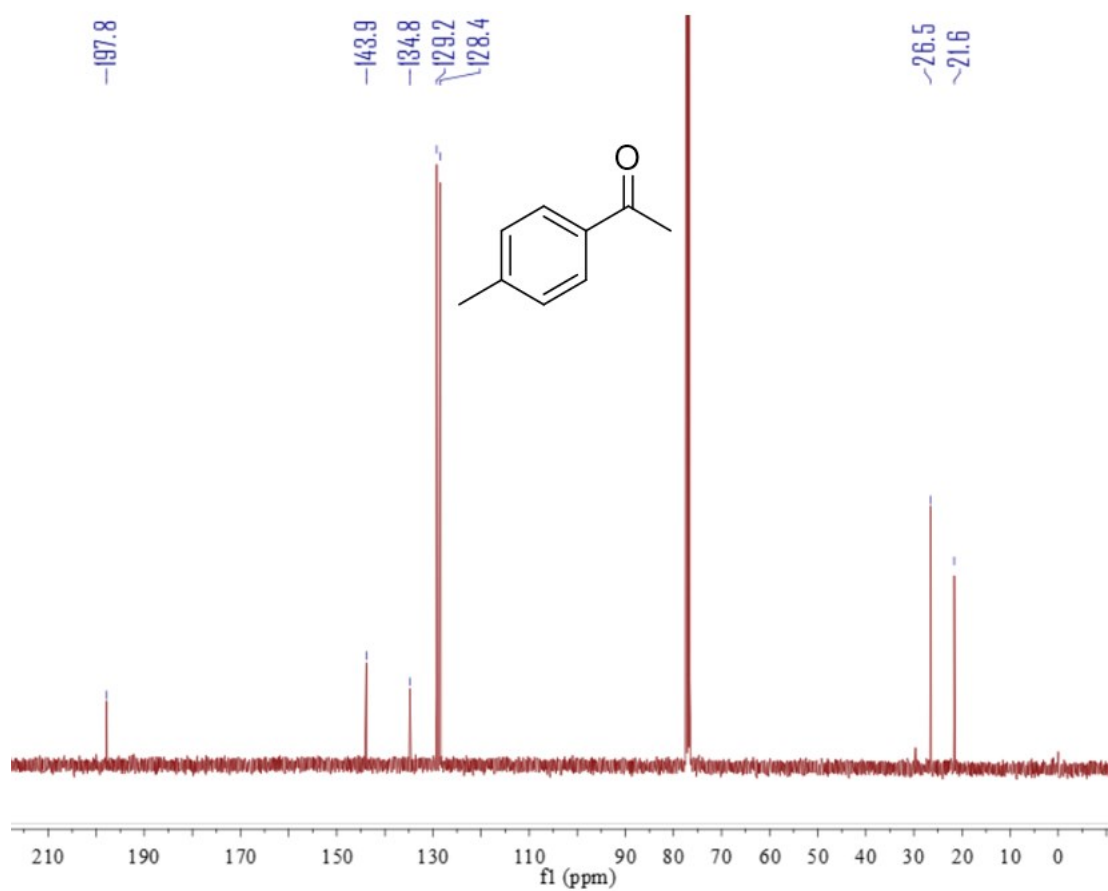

Supplement: d0gc01727b1.pdf [file d0gc01727b1.pdf]
